# Supplementary material for: A common mechanism for coenzyme cobalamin-dependent reductive dehalogenases
Source: Royal Society of Chemistry journal article supplement (doi:10.1039/c6cp08659d), 2017-01-01
Supplement: c6cp08659d1.pdf [file c6cp08659d1.pdf]

Supporting Information:

## A general mechanism for B12-dependent reductive dehalogenation

Linus O. Johannissen,\* David Leys and Sam Hay\*

SYNBIOCHEM, Manchester Institute of Biotechnology and School of Chemistry, University of Manchester, 131 Princess Street, Manchester M1 7DN, UK.

E-mail: linus.johannissen@manchester.ac.uk, sam.hay@manchester.ac.uk

**Table S1.** Gas-phase BDEs for the C-X bond of interest for this study ground state and 1-electron reduced substrates.

| Substrate | Charge | BDE / kJ mol <sup>-1</sup> |
|-----------|--------|----------------------------|
| TCE       | 0      | 916.7                      |
|           | -1     | 109.1                      |
| TBE       | 0      | 820.5                      |
|           | -1     | 105.7                      |
| DBMP      | -1     | 342.1                      |
|           | -2     | -285.0                     |
| DCMP      | -1     | 381.5                      |
|           | -2     | -310.0                     |

BDEs were calculated from the equation:

$$\text{BDE} = E(\text{RX}) - [E(\text{R}^+) + E(\text{X}^-)]$$

where  $E$  is the potential energy,  $\text{R}^+$  is the substrate without the halide  $\text{X}^-$  and  $E(\text{RX})$  includes the correction for basis set superposition error using the counterpoise method.

**Table S2.** HOMO and LUMO energies for the substrates in the gas phase

| Substrate | HOMO / eV | LUMO / eV |
|-----------|-----------|-----------|
| TCE       | -0.00789  | 3.17      |
| TBE       | 0.220     | 3.42      |
| DBMP      | -6.10     | -1.82     |
| DCMP      | -6.13     | -1.52     |

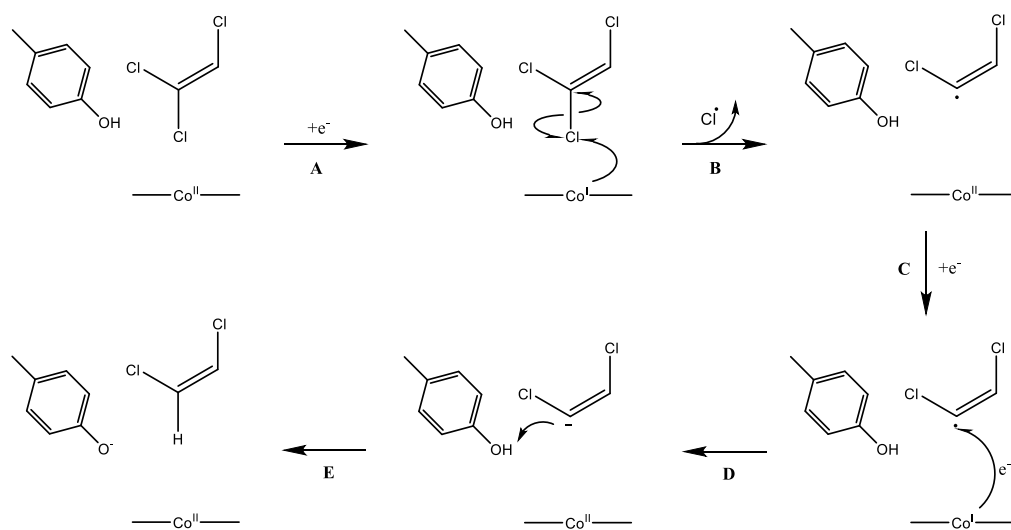

**Scheme S1.** Dissociative electron transfer mechanism for dehalogenation proposed by Bommer *et al.*<sup>[1]</sup>

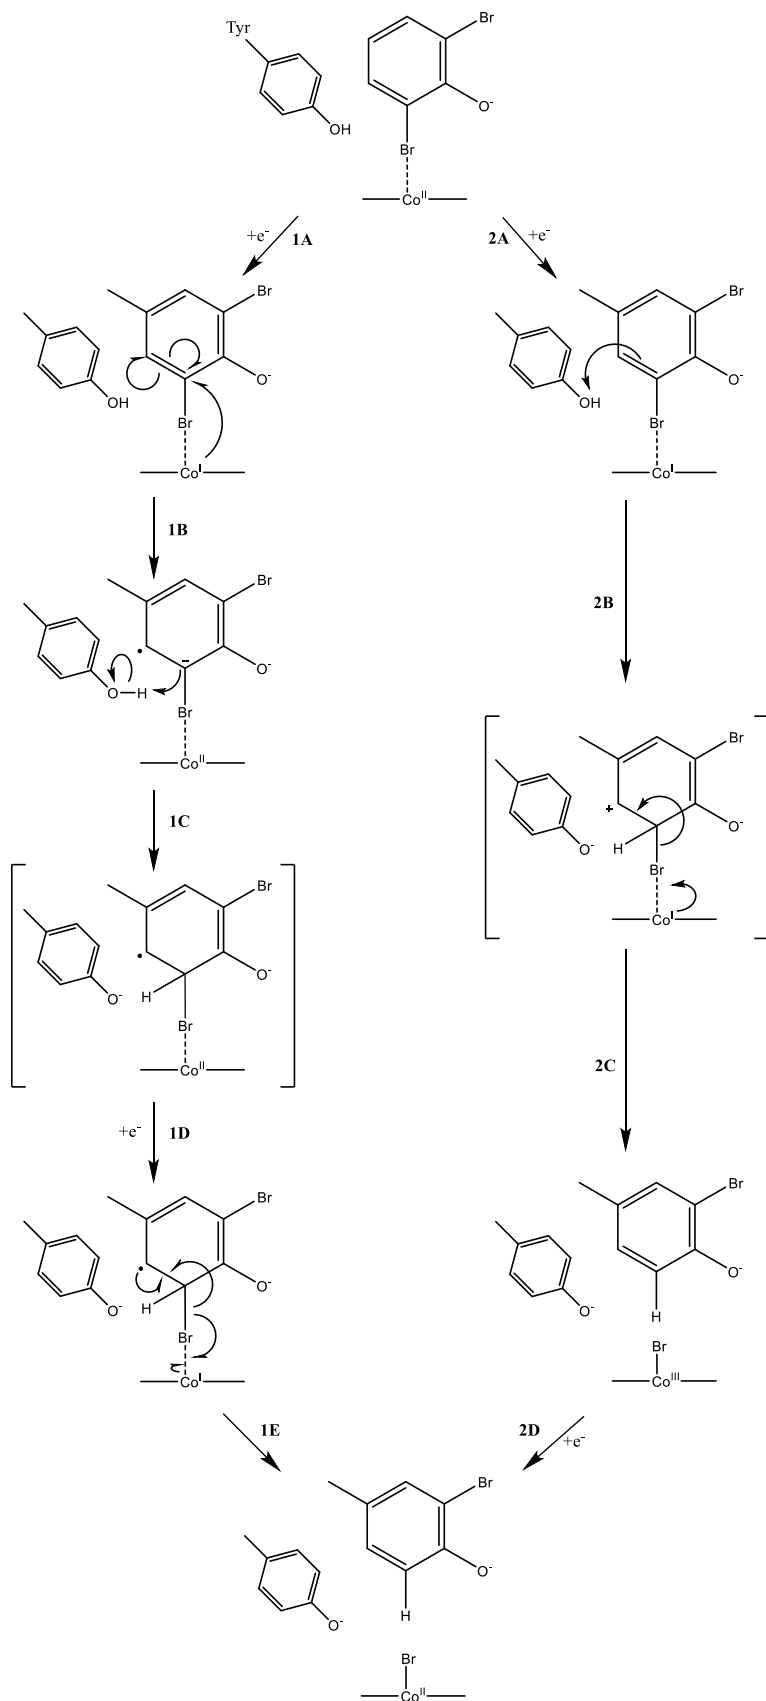

**Scheme S2.** Homolytic (A) and heterolytic (B) dehalogenation mechanisms proposed by Payne *et al.*<sup>[2]</sup> The concerted mechanism proposed by Liao *et al.* corresponds to the heterolytic mechanism with steps **2B** and **2C** combined.<sup>[3]</sup>

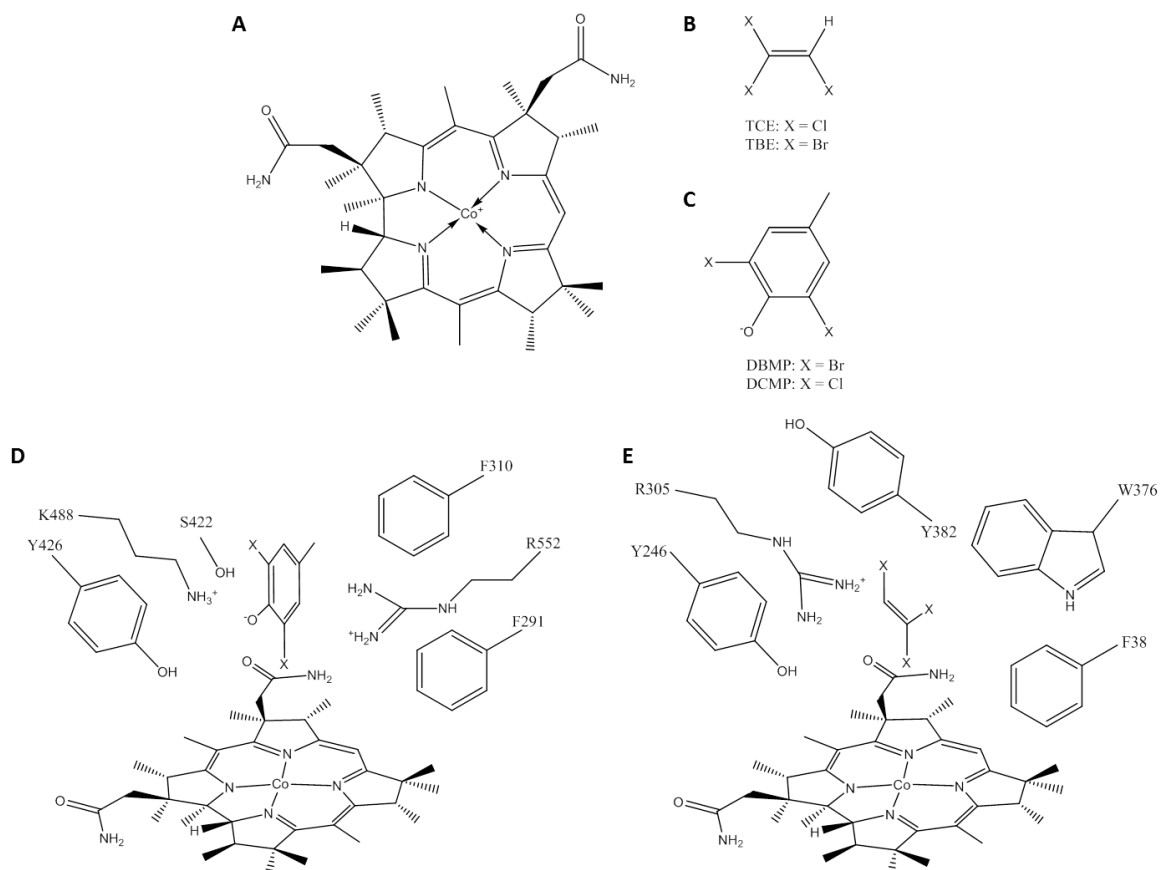

**Figure S1.** Structures used in DFT models: (A) cobalamin, (B) trihaloethylene, (C) 2,6-dihalo-4-methylphenolate, (D) NpRdhA active site with bound substrate, (E) PceA active site with bound substrate.

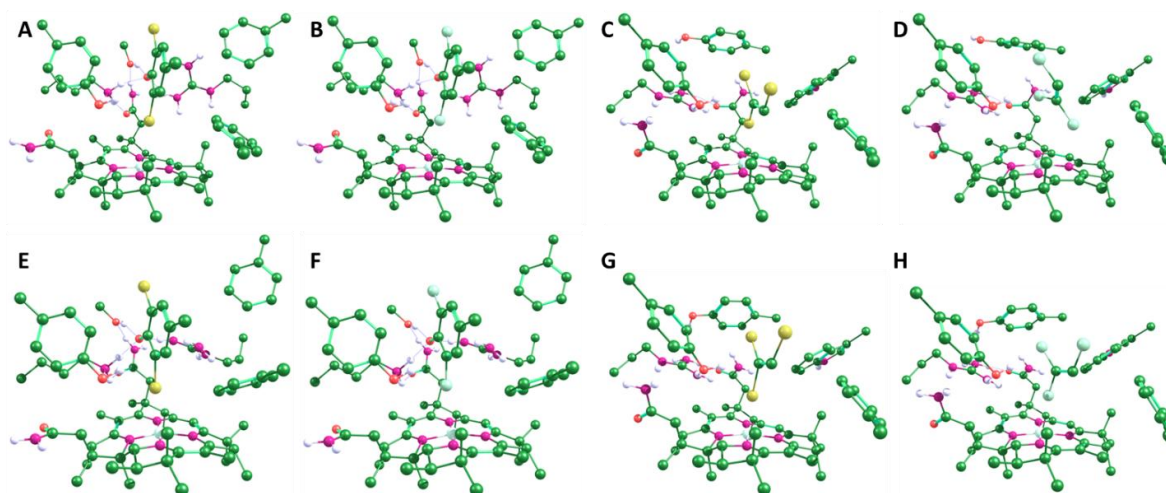

**Figure S2.** Optimised active site models, with non-polar hydrogens removed for clarity: (A-D)  $\text{Co}^{\text{II}}$  active site models and (E-F)  $\text{Co}^{\text{I}}$  active site models for (A,E) DBMP, (B,F) DCMP, (C,G) TBE and (D,H) TCE.

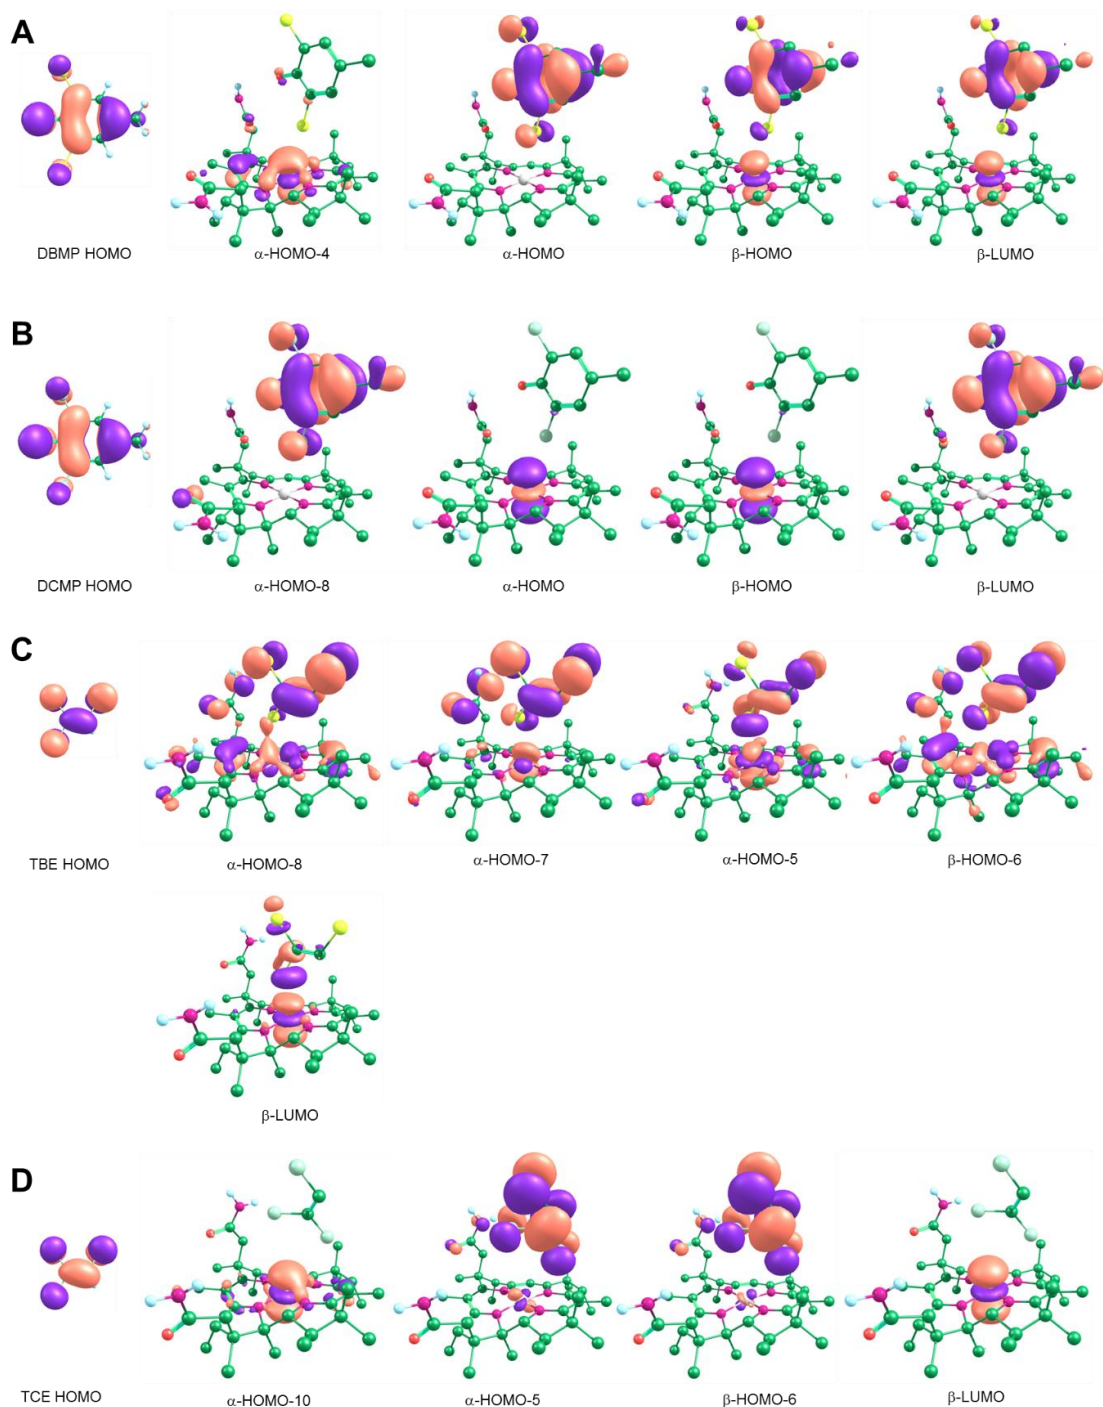

**Figure S3.** Molecular orbitals for the  $\text{Co}^{\text{II}}$  optimised active site models corresponding to the  $\text{Co } d_z^2$  orbitals; the HOMO of the substrate is shown for comparison on the far left. **(A)** NpRdhA/DBMP: half a charge is transferred (Table 2 in the main text) so that the SOMO and LUMO are both delocalised across the substrate HOMO and  $\text{Co } d_z^2$  orbitals. **(B)** NpRdhA/DCMP: DCMP fully reduces the cobalamin (the spin density is fully localised on the substrate, see Table 2 in the main text) so that the HOMO of the substrate is split into highest singly-occupied MO (SOMO) and lowest unoccupied MO (LUMO). **(C)** PceA/TBE: the HOMO of the substrate is delocalised with bonding orbitals of the cobalamin, so that the unoccupied  $\text{Co } d_z^2$  orbital is delocalised with the C-Br anti-bonding orbital in the LUMO, hence TBE has very little spin density. **(D)** PceA/TCE: there is no delocalisation of the TCE HOMO and  $\text{Co } d_z^2$  orbitals.

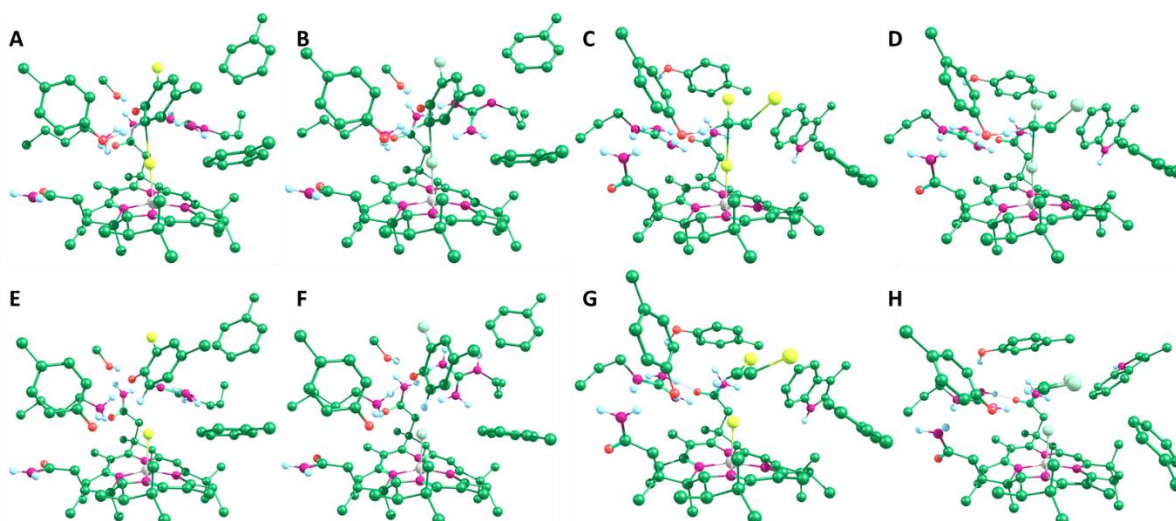

**Figure S4.** (A-D) Transition state and (E-H) product geometries, truncated for clarity (most amino acids and non-polar hydrogens removed) for dehalogenation in  $\text{Co}^{\text{I}}$  active site models: (A,E) DBMP, (B,F) DCMP, (C,G) TBE and (D,H) TCE.

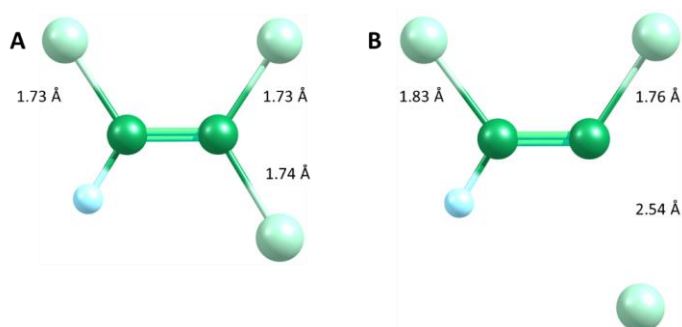

**Figure S5.** Optimised gas phase geometry of TCE (A) before and (B) after 1-electron reduction.

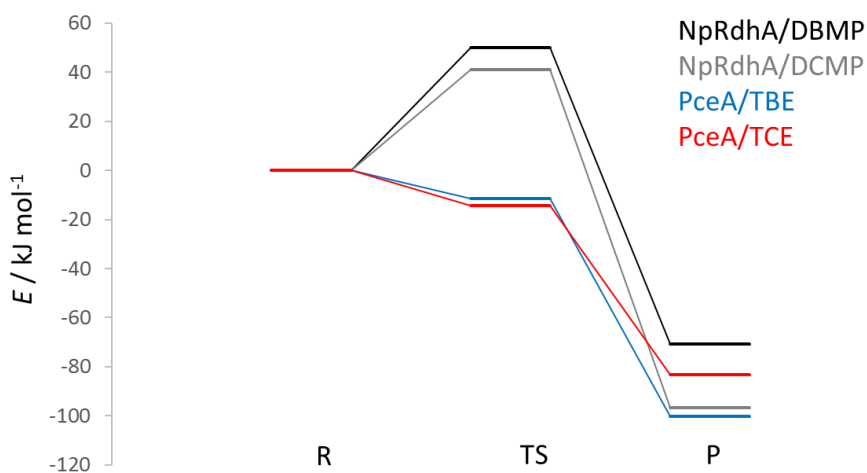

**Figure S6.** Calculated Gibbs free energy diagram for  $\text{Co}^{\text{I}}$ -catalysed dehalogenation in NpRdhA and PceA models.

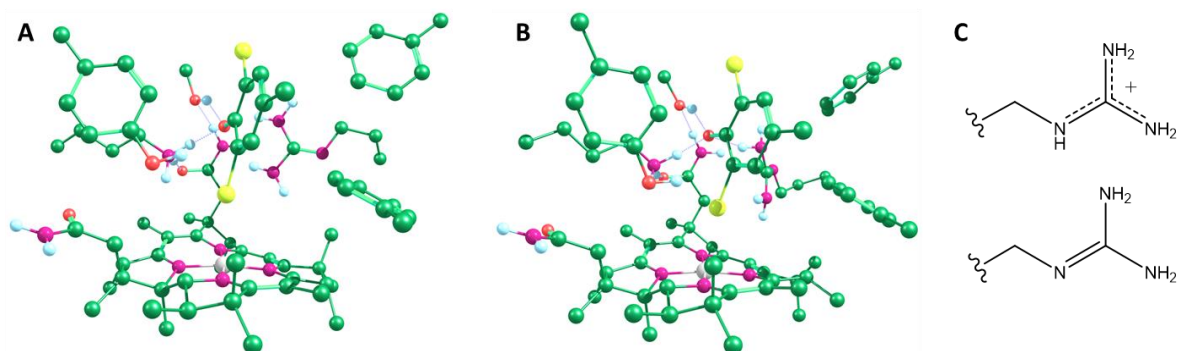

**Figure S7.** Optimised (A) Co<sup>II</sup> and (B) Co<sup>I</sup> NpRdhA/DBMP active site models with a neutralised R552 analogue, with non-polar hydrogens removed for clarity. (C) The chemical structure of protonated arginine, top, and the neutral form, bottom.

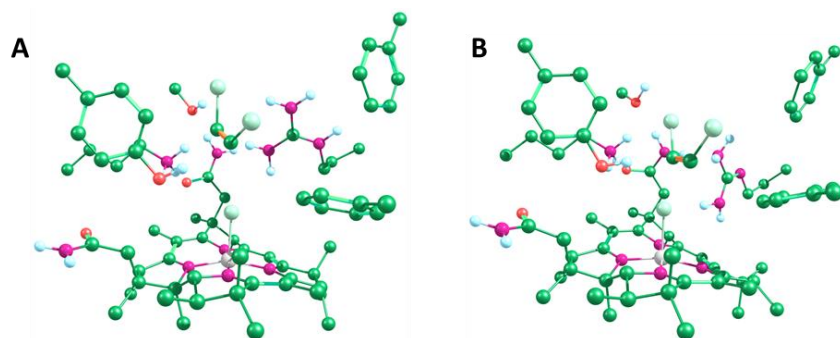

**Figure S8.** Optimised Co<sup>I</sup> active site models for (A) NpRdhA/TCE and (B) NpRdhA/TCE with a neutralized R552.

## References

1. Bommer, M., et al., *Structural basis for organohalide respiration*. *Science*, 2014. **346**(6208): p. 455-8.
2. Payne, K.A., et al., *Reductive dehalogenase structure suggests a mechanism for B12-dependent dehalogenation*. *Nature*, 2015. **517**(7535): p. 513-6.
3. Liao, R.-Z., S.-L. Chen, and P.E.M. Siegbahn, *Which Oxidation State Initiates Dehalogenation in the B12-Dependent Enzyme NpRdhA: CoII, CoI, or Co0?* *ACS Catal.*, 2015. **5**(12): p. 7350-7358.

## Cartesian coordinates of optimised structures

1A. NpRdhA/DBMP, Co<sup>II</sup>  
1B. NpRdhA/DBMP, Co<sup>I</sup>  
1C. NpRdhA/DBMP, Co<sup>I</sup> → Co<sup>III</sup> Transition State  
1D. NpRdhA/DBMP, Co<sup>III</sup>

2A. NpRdhA/DCMP, Co<sup>II</sup>  
2B. NpRdhA/DCMP, Co<sup>I</sup>  
2C. NpRdhA/DCMP, Co<sup>I</sup> → Co<sup>III</sup> Transition State  
2D. NpRdhA/DCMP, Co<sup>III</sup>

3A. PceA/TCE, Co<sup>II</sup>  
3B. PceA/TCE, Co<sup>I</sup>  
3C. PceA/TCE, Co<sup>I</sup> → Co<sup>III</sup> Transition State  
3D. PceA/TCE, Co<sup>III</sup>

4A. PceA/TBE, Co<sup>II</sup>  
4B. PceA/TBE, Co<sup>I</sup>  
4C. PceA/TBE, Co<sup>I</sup> → Co<sup>III</sup> Transition State  
4D. PceA/TBE, Co<sup>III</sup>

5A. NpRdhA/DBMP with neutralized R552, Co<sup>II</sup>  
5B. NpRdhA/DBMP with neutralized R552, Co<sup>I</sup>

6A. NpRdhA/TCE, Co<sup>I</sup>  
6B. NpRdhA/TCE with neutralized R552, Co<sup>I</sup>

1A. NpRdhA/DBMP, Co<sup>II</sup> (Charge = 2, Multiplicity = 2)

|    |               |              |              |
|----|---------------|--------------|--------------|
| C  | 2.767042000   | 7.745209000  | -1.375468000 |
| C  | 6.234703000   | 4.776158000  | 2.000383000  |
| C  | -6.250795000  | -2.553039000 | 3.470035000  |
| C  | -10.122743000 | 1.914071000  | 0.835203000  |
| C  | -0.160317000  | 5.144444000  | 3.344998000  |
| C  | -4.351732000  | -2.447006000 | -5.147355000 |
| Co | 1.968360000   | -2.807275000 | 0.307740000  |
| C  | -1.522924000  | 2.439099000  | -0.134346000 |
| C  | -1.270962000  | 1.440318000  | -1.108282000 |
| C  | -1.783610000  | 1.474046000  | -2.403861000 |
| C  | -2.631821000  | 2.511591000  | -2.808358000 |
| C  | -2.922424000  | 3.515993000  | -1.875231000 |
| C  | -2.379875000  | 3.474066000  | -0.596416000 |
| O  | -1.006038000  | 2.402438000  | 1.072781000  |
| Br | -0.147602000  | -0.038732000 | -0.600571000 |
| Br | -2.763883000  | 4.893973000  | 0.626378000  |
| C  | -3.252553000  | 2.519016000  | -4.184396000 |
| H  | -2.671596000  | 1.909869000  | -4.883281000 |
| H  | -4.270855000  | 2.111626000  | -4.149933000 |
| H  | -3.317445000  | 3.533828000  | -4.587436000 |
| H  | -1.534470000  | 0.674788000  | -3.094200000 |
| H  | -3.573719000  | 4.339884000  | -2.150346000 |
| C  | -4.439443000  | -2.476168000 | -3.638193000 |
| C  | -3.841416000  | -1.460918000 | -2.864051000 |
| C  | -3.887252000  | -1.489255000 | -1.463398000 |
| C  | -4.551630000  | -2.537930000 | -0.809296000 |
| C  | -5.153059000  | -3.558107000 | -1.562346000 |
| C  | -5.094381000  | -3.526648000 | -2.963984000 |
| H  | -5.185432000  | -2.996161000 | -5.614477000 |
| H  | -3.412242000  | -2.920851000 | -5.493007000 |
| H  | -4.357929000  | -1.412904000 | -5.531752000 |
| H  | -3.349810000  | -0.624894000 | -3.371880000 |
| H  | -3.424285000  | -0.680075000 | -0.888607000 |
| H  | -4.624664000  | -2.545595000 | 0.281031000  |
| H  | -5.683808000  | -4.373640000 | -1.058909000 |
| H  | -5.574017000  | -4.322843000 | -3.544214000 |
| C  | 2.420073000   | 6.316347000  | -1.713079000 |
| C  | 3.424088000   | 5.390539000  | -2.034756000 |
| C  | 3.125808000   | 4.066773000  | -2.345269000 |
| C  | 1.796901000   | 3.640112000  | -2.336120000 |
| C  | 0.774993000   | 4.540865000  | -2.034204000 |
| C  | 1.094640000   | 5.865562000  | -1.726620000 |
| O  | 1.552933000   | 2.299135000  | -2.590623000 |
| H  | 0.586986000   | 2.157250000  | -2.588645000 |
| H  | 3.154000000   | 8.274275000  | -2.254202000 |



|   |               |              |              |
|---|---------------|--------------|--------------|
| H | 3.541750000   | 7.792203000  | -0.601652000 |
| H | 1.891915000   | 8.292837000  | -1.014920000 |
| H | 4.463919000   | 5.708846000  | -2.040471000 |
| H | 3.913573000   | 3.367423000  | -2.600003000 |
| H | -0.261307000  | 4.212640000  | -2.039329000 |
| H | 0.289754000   | 6.557288000  | -1.489896000 |
| C | 4.745016000   | 4.977946000  | 1.692787000  |
| C | 4.010670000   | 3.666098000  | 1.362945000  |
| C | 2.518643000   | 3.906439000  | 1.152842000  |
| N | 1.783476000   | 2.648839000  | 0.791487000  |
| H | 1.920887000   | 1.876819000  | 1.506571000  |
| H | 0.738877000   | 2.766223000  | 0.796519000  |
| H | 2.051056000   | 2.299698000  | -0.140189000 |
| H | 6.753324000   | 4.303398000  | 1.147320000  |
| H | 6.373154000   | 4.123388000  | 2.881677000  |
| H | 6.729676000   | 5.738524000  | 2.213869000  |
| H | 4.629785000   | 5.672946000  | 0.838714000  |
| H | 4.249443000   | 5.466779000  | 2.554703000  |
| H | 4.457431000   | 3.206848000  | 0.461998000  |
| H | 4.149479000   | 2.945685000  | 2.192524000  |
| H | 2.333202000   | 4.634654000  | 0.348067000  |
| H | 2.041731000   | 4.268457000  | 2.073669000  |
| C | -6.632026000  | -1.419490000 | 2.507326000  |
| C | -5.790696000  | -0.147585000 | 2.653903000  |
| N | -4.363723000  | -0.423658000 | 2.393011000  |
| C | -3.404801000  | 0.513581000  | 2.275626000  |
| N | -3.732770000  | 1.815753000  | 2.223840000  |
| N | -2.099085000  | 0.179528000  | 2.258616000  |
| H | -4.048775000  | -1.382568000 | 2.533452000  |
| H | -2.987298000  | 2.484572000  | 2.001576000  |
| H | -4.688567000  | 2.093933000  | 2.001199000  |
| H | -1.836256000  | -0.797976000 | 2.160054000  |
| H | -1.442623000  | 0.894896000  | 1.864452000  |
| H | -6.931671000  | -3.411460000 | 3.346884000  |
| H | -6.307222000  | -2.224263000 | 4.522716000  |
| H | -5.226436000  | -2.935464000 | 3.292734000  |
| H | -7.681053000  | -1.122858000 | 2.679737000  |
| H | -6.580861000  | -1.760889000 | 1.457280000  |
| H | -6.144063000  | 0.599297000  | 1.922901000  |
| H | -5.898682000  | 0.277196000  | 3.671137000  |
| C | -8.672684000  | 1.791622000  | 0.405680000  |
| C | -8.212433000  | 0.649279000  | -0.285082000 |
| C | -6.894279000  | 0.562434000  | -0.760341000 |
| C | -5.998435000  | 1.623981000  | -0.552797000 |
| C | -6.433439000  | 2.763353000  | 0.147591000  |
| C | -7.752960000  | 2.839749000  | 0.626539000  |
| H | -10.721879000 | 2.367545000  | 0.023597000  |
| H | -10.230135000 | 2.557836000  | 1.724053000  |
| H | -10.563708000 | 0.928162000  | 1.058552000  |
| H | -8.905373000  | -0.180492000 | -0.467550000 |
| H | -6.566064000  | -0.331302000 | -1.301592000 |
| H | -4.975205000  | 1.570651000  | -0.940914000 |
| H | -5.752181000  | 3.610584000  | 0.296335000  |
| H | -8.082574000  | 3.739774000  | 1.158447000  |
| O | -0.005593000  | 3.741166000  | 3.133987000  |
| H | 0.069223000   | 5.724846000  | 2.430645000  |
| H | 0.546265000   | 5.440494000  | 4.137497000  |
| H | -1.185575000  | 5.398778000  | 3.675347000  |
| H | -0.575117000  | 3.432597000  | 2.379466000  |
| C | 0.846343000   | -3.908690000 | -4.829403000 |
| C | 1.055394000   | -2.785041000 | -3.798146000 |
| C | 0.211286000   | -1.543864000 | -4.168816000 |
| C | 2.584005000   | -2.443204000 | -3.721083000 |
| C | 3.085495000   | -1.494462000 | -4.808531000 |
| C | 2.746951000   | -1.947102000 | -2.282889000 |
| C | 4.061669000   | -2.146701000 | -1.489845000 |
| C | 5.199012000   | -1.059734000 | -1.592319000 |
| C | 5.667537000   | -0.922329000 | -0.099946000 |
| C | 4.441727000   | -1.345938000 | 0.675021000  |
| C | 4.221965000   | -1.087289000 | 2.070183000  |
| C | 5.069138000   | -0.009752000 | 2.715365000  |
| C | 6.911107000   | -1.726069000 | 0.330488000  |
| C | 4.590212000   | 0.309148000  | -2.028962000 |
| C | 5.599350000   | 1.452174000  | -2.011453000 |
| N | 6.074987000   | 1.846382000  | -3.224174000 |
| O | 5.953720000   | 2.001284000  | -0.966554000 |
| C | 6.335720000   | -1.434221000 | -2.550322000 |
| C | 4.573979000   | -3.586212000 | -1.668103000 |
| N | 3.589407000   | -1.992871000 | -0.079890000 |
| N | 1.719909000   | -2.725320000 | -1.539125000 |
| C | 0.769711000   | -3.165603000 | -2.335169000 |
| C | -0.372108000  | -3.877443000 | -1.839231000 |
| C | -1.452834000  | -4.325556000 | -2.799420000 |
| C | -0.499374000  | -4.192110000 | -0.501999000 |
| N | 0.364350000   | -3.810943000 | 0.520606000  |
| C | -1.561263000  | -5.127657000 | 0.053933000  |
| C | -1.230043000  | -6.580884000 | -0.340710000 |
| C | -1.492522000  | -4.851409000 | 1.580845000  |
| C | -1.775632000  | -6.055895000 | 2.485995000  |
| C | -2.478911000  | -3.706279000 | 1.927444000  |
| C | -0.094901000  | -4.274864000 | 1.711532000  |
| C | 0.572947000   | -4.140984000 | 2.921508000  |
| C | 1.713542000   | -3.376244000 | 3.122248000  |
| N | 2.350653000   | -2.671074000 | 2.159039000  |
| C | 2.378145000   | -3.152606000 | 4.454305000  |

|   |              |              |              |
|---|--------------|--------------|--------------|
| C | 3.496744000  | -4.186989000 | 4.681639000  |
| C | 2.884511000  | -1.687620000 | 4.247302000  |
| C | 3.232772000  | -1.757546000 | 2.750614000  |
| C | 3.992786000  | -1.311177000 | 5.237252000  |
| C | 1.619436000  | -0.794641000 | 4.494484000  |
| C | 1.553530000  | 0.556969000  | 3.808074000  |
| O | 1.787673000  | 0.632931000  | 2.586876000  |
| N | 1.157990000  | 1.611345000  | 4.541840000  |
| H | 1.233250000  | -4.864002000 | -4.460539000 |
| H | 1.393772000  | -3.654956000 | -5.743886000 |
| H | -0.200486000 | -4.040017000 | -5.107587000 |
| H | -0.854656000 | -1.742646000 | -4.026095000 |
| H | 0.370107000  | -1.280077000 | -5.219088000 |
| H | 0.478264000  | -0.682920000 | -3.548530000 |
| H | 3.111465000  | -3.400751000 | -3.814582000 |
| H | 4.176613000  | -1.415919000 | -4.785247000 |
| H | 2.666197000  | -0.489445000 | -4.693342000 |
| H | 2.814156000  | -1.861801000 | -5.803396000 |
| H | 5.889137000  | 0.131281000  | 0.090716000  |
| H | 4.466951000  | 0.603844000  | 3.386084000  |
| H | 5.476074000  | 0.660081000  | 1.955719000  |
| H | 5.913451000  | -0.410556000 | 3.286378000  |
| H | 7.114207000  | -1.550450000 | 1.390711000  |
| H | 7.789493000  | -1.398866000 | -0.231854000 |
| H | 6.788095000  | -2.803311000 | 0.189702000  |
| H | 3.786798000  | 0.591914000  | -1.341071000 |
| H | 4.151491000  | 0.216004000  | -3.025359000 |
| H | 5.810597000  | 1.390948000  | -4.085634000 |
| H | 6.777465000  | 2.574782000  | -3.259737000 |
| H | 6.806951000  | -2.381576000 | -2.283291000 |
| H | 7.112740000  | -0.664217000 | -2.535105000 |
| H | 5.972411000  | -1.518811000 | -3.580013000 |
| H | 3.755932000  | -4.291705000 | -1.487633000 |
| H | 5.372343000  | -3.806356000 | -0.957605000 |
| H | 4.954245000  | -3.753289000 | -2.678616000 |
| H | -2.395785000 | -4.499201000 | -2.280657000 |
| H | -1.182321000 | -5.244947000 | -3.330418000 |
| H | -1.652138000 | -3.558931000 | -3.549232000 |
| H | -2.553290000 | -4.869962000 | -0.330769000 |
| H | -1.970549000 | -7.274045000 | 0.067367000  |
| H | -0.240749000 | -6.869645000 | 0.029063000  |
| H | -1.229523000 | -6.689655000 | -1.427656000 |
| H | -1.769621000 | -5.758760000 | 3.539943000  |
| H | -1.037763000 | -6.850716000 | 2.353979000  |
| H | -2.767793000 | -6.464954000 | 2.269902000  |
| H | -2.332647000 | -2.865209000 | 1.239031000  |
| H | -2.328422000 | -3.370650000 | 2.960517000  |
| H | -3.509127000 | -4.061419000 | 1.819617000  |
| H | 0.136737000  | -4.617048000 | 3.792802000  |
| H | 1.660705000  | -3.203564000 | 5.281023000  |
| H | 3.077154000  | -5.196988000 | 4.685209000  |
| H | 3.991020000  | -4.021907000 | 5.642610000  |
| H | 4.247648000  | -4.129963000 | 3.886662000  |
| H | 3.689422000  | -1.621827000 | 6.243372000  |
| H | 4.171137000  | -0.234863000 | 5.269476000  |
| H | 4.936100000  | -1.808715000 | 5.002288000  |
| H | 1.483619000  | -0.701143000 | 5.577618000  |
| H | 0.740620000  | -1.328887000 | 4.106765000  |
| H | 0.824821000  | 2.473577000  | 4.075226000  |
| H | 0.930708000  | 1.485605000  | 5.518811000  |
| H | 2.450883000  | -0.893285000 | -2.208687000 |

### 1B. NpRdhA/DBMP, Co<sup>I</sup> (Charge = 1, Multiplicity = 1)

|    |               |              |              |
|----|---------------|--------------|--------------|
| C  | 2.767042000   | 7.745209000  | -1.375468000 |
| C  | 6.234703000   | 4.776158000  | 2.000383000  |
| C  | -6.250795000  | -2.553039000 | 3.470035000  |
| C  | -10.122743000 | 1.914071000  | 0.835203000  |
| C  | -0.160317000  | 5.144444000  | 3.344998000  |
| C  | -4.351732000  | -2.447006000 | -5.147355000 |
| Co | 1.968360000   | -2.807275000 | 0.307740000  |
| C  | -1.522924000  | 2.439099000  | -0.134346000 |
| C  | -1.270962000  | 1.440318000  | -1.108282000 |
| C  | -1.783610000  | 1.474046000  | -2.403861000 |
| C  | -2.631821000  | 2.511591000  | -2.808358000 |
| C  | -2.922424000  | 3.515993000  | -1.875231000 |
| C  | -2.379875000  | 3.474066000  | -0.596416000 |
| O  | -1.006038000  | 2.402438000  | 1.072781000  |
| Br | -0.147602000  | -0.038732000 | -0.600571000 |
| Br | -2.763883000  | 4.893973000  | 0.626378000  |
| C  | -3.252553000  | 2.519016000  | -4.184396000 |
| H  | -2.671596000  | 1.909869000  | -4.883281000 |
| H  | -4.270855000  | 2.111626000  | -4.149933000 |
| H  | -3.317445000  | 3.533828000  | -4.587436000 |
| H  | -1.534470000  | 0.674788000  | -3.094200000 |
| H  | -3.573719000  | 4.339884000  | -2.150346000 |
| C  | -4.439443000  | -2.476168000 | -3.638193000 |
| C  | -3.841416000  | -1.460918000 | -2.864051000 |
| C  | -3.887252000  | -1.489255000 | -1.463398000 |
| C  | -4.551630000  | -2.537930000 | -0.809296000 |
| C  | -5.153059000  | -3.558107000 | -1.562346000 |
| C  | -5.094381000  | -3.526648000 | -2.963984000 |
| H  | -5.185432000  | -2.996161000 | -5.614477000 |
| H  | -3.412242000  | -2.920851000 | -5.493007000 |
| H  | -4.357929000  | -1.412904000 | -5.531752000 |

|   |               |              |              |
|---|---------------|--------------|--------------|
| H | -3.349810000  | -0.624894000 | -3.371880000 |
| H | -3.424285000  | -0.680075000 | -0.888607000 |
| H | -4.624664000  | -2.545595000 | 0.281031000  |
| H | -5.683808000  | -4.373640000 | -1.058909000 |
| H | -5.574017000  | -4.322843000 | -3.544214000 |
| C | 2.420073000   | 6.316347000  | -1.713079000 |
| C | 3.424088000   | 5.390539000  | -2.034756000 |
| C | 3.125808000   | 4.066773000  | -2.345269000 |
| C | 1.796901000   | 3.640112000  | -2.336120000 |
| C | 0.774993000   | 4.540865000  | -2.034204000 |
| C | 1.094640000   | 5.865562000  | -1.726620000 |
| O | 1.552933000   | 2.299135000  | -2.590623000 |
| H | 0.586986000   | 2.157250000  | -2.588645000 |
| H | 3.154000000   | 8.274275000  | -2.254202000 |
| H | 3.541750000   | 7.792203000  | -0.601652000 |
| H | 1.891915000   | 8.292837000  | -1.014920000 |
| H | 4.463919000   | 5.708846000  | -2.040471000 |
| H | 3.913573000   | 3.367423000  | -2.600003000 |
| H | -0.261307000  | 4.212640000  | -2.039329000 |
| H | 0.289754000   | 6.557288000  | -1.489896000 |
| C | 4.745016000   | 4.977946000  | 1.692787000  |
| C | 4.010670000   | 3.666098000  | 1.362945000  |
| C | 2.518643000   | 3.906439000  | 1.152842000  |
| N | 1.783476000   | 2.648839000  | 0.791487000  |
| H | 1.920887000   | 1.876819000  | 1.506571000  |
| H | 0.738877000   | 2.766223000  | 0.796519000  |
| H | 2.051056000   | 2.299698000  | -0.140189000 |
| H | 6.753324000   | 4.303398000  | 1.147320000  |
| H | 6.373154000   | 4.123388000  | 2.881677000  |
| H | 6.729676000   | 5.738524000  | 2.213869000  |
| H | 4.629785000   | 5.672946000  | 0.838714000  |
| H | 4.249443000   | 5.466779000  | 2.554703000  |
| H | 4.457431000   | 3.206848000  | 0.461998000  |
| H | 4.149479000   | 2.945685000  | 2.192524000  |
| H | 2.333202000   | 4.634654000  | 0.348067000  |
| H | 2.041731000   | 4.268457000  | 2.073669000  |
| C | -6.632026000  | -1.419490000 | 2.507326000  |
| C | -5.790696000  | -0.147585000 | 2.653903000  |
| N | -4.363723000  | -0.423658000 | 2.393011000  |
| C | -3.404801000  | 0.513581000  | 2.275626000  |
| N | -3.732770000  | 1.815753000  | 2.223840000  |
| N | -2.099085000  | 0.179528000  | 2.258616000  |
| H | -4.048775000  | -1.382568000 | 2.533452000  |
| H | -2.987298000  | 2.484572000  | 2.001576000  |
| H | -4.688567000  | 2.093933000  | 2.001199000  |
| H | -1.836256000  | -0.797976000 | 2.160054000  |
| H | -1.442623000  | 0.894896000  | 1.864452000  |
| H | -6.931671000  | -3.411460000 | 3.346884000  |
| H | -6.307222000  | -2.224263000 | 4.522716000  |
| H | -5.226436000  | -2.935464000 | 3.292734000  |
| H | -7.681053000  | -1.122858000 | 2.679737000  |
| H | -6.580861000  | -1.760889000 | 1.457280000  |
| H | -6.144063000  | 0.599297000  | 1.922901000  |
| H | -5.898682000  | 0.277196000  | 3.671137000  |
| C | -8.672684000  | 1.791622000  | 0.405680000  |
| C | -8.212433000  | 0.649279000  | -0.285082000 |
| C | -6.894279000  | 0.562434000  | -0.760341000 |
| C | -5.998435000  | 1.623981000  | -0.552797000 |
| C | -6.433439000  | 2.763353000  | 0.147591000  |
| C | -7.752960000  | 2.839749000  | 0.626539000  |
| H | -10.721879000 | 2.367545000  | 0.023597000  |
| H | -10.230135000 | 2.557836000  | 1.724053000  |
| H | -10.563708000 | 0.928162000  | 1.058552000  |
| H | -8.905373000  | -0.180492000 | -0.467550000 |
| H | -6.566064000  | -0.331302000 | -1.301592000 |
| H | -4.975205000  | 1.570651000  | -0.940914000 |
| H | -5.752181000  | 3.610584000  | 0.296335000  |
| H | -8.082574000  | 3.739774000  | 1.158447000  |
| O | -0.005593000  | 3.741166000  | 3.133987000  |
| H | 0.069223000   | 5.724846000  | 2.430645000  |
| H | 0.546265000   | 5.440494000  | 4.137497000  |
| H | -1.185575000  | 5.398778000  | 3.675347000  |
| H | -0.575117000  | 3.432597000  | 2.379466000  |
| C | 0.846343000   | -3.908690000 | -4.829403000 |
| C | 1.055394000   | -2.785041000 | -3.798146000 |
| C | 0.211286000   | -1.543864000 | -4.168816000 |
| C | 2.584005000   | -2.443204000 | -3.721083000 |
| C | 3.085495000   | -1.494462000 | -4.808531000 |
| C | 2.746951000   | -1.947102000 | -2.282889000 |
| C | 4.061669000   | -2.146701000 | -1.489845000 |
| C | 5.199012000   | -1.059734000 | -1.592319000 |
| C | 5.667537000   | -0.922329000 | -0.099946000 |
| C | 4.441727000   | -1.345938000 | 0.675021000  |
| C | 4.221965000   | -1.087289000 | 2.070183000  |
| C | 5.069138000   | -0.009752000 | 2.715365000  |
| C | 6.911107000   | -1.726069000 | 0.330488000  |
| C | 4.590212000   | 0.309148000  | -2.028962000 |
| C | 5.599350000   | 1.452174000  | -2.011453000 |
| N | 6.074987000   | 1.846382000  | -3.224174000 |
| O | 5.953720000   | 2.001284000  | -0.966554000 |
| C | 6.335720000   | -1.434221000 | -2.550322000 |
| C | 4.573979000   | -3.586212000 | -1.668103000 |
| N | 3.589407000   | -1.992871000 | -0.079890000 |
| N | 1.719909000   | -2.725320000 | -1.539125000 |
| C | 0.769711000   | -3.165603000 | -2.335169000 |

|   |              |              |              |
|---|--------------|--------------|--------------|
| C | -0.372108000 | -3.877443000 | -1.839231000 |
| C | -1.452834000 | -4.325556000 | -2.799420000 |
| C | -0.499374000 | -4.192110000 | -0.501999000 |
| N | 0.364350000  | -3.810943000 | 0.520606000  |
| C | -1.561263000 | -5.127657000 | 0.053933000  |
| C | -1.230043000 | -6.580884000 | -0.340710000 |
| C | -1.492522000 | -4.851409000 | 1.580845000  |
| C | -1.775632000 | -6.055895000 | 2.485995000  |
| C | -2.478911000 | -3.706279000 | 1.927444000  |
| C | -0.094901000 | -4.274864000 | 1.711532000  |
| C | 0.572947000  | -4.140984000 | 2.921508000  |
| C | 1.713542000  | -3.376244000 | 3.122248000  |
| N | 2.350653000  | -2.671074000 | 2.159039000  |
| C | 2.378145000  | -3.152606000 | 4.454305000  |
| C | 3.496744000  | -4.186989000 | 4.681639000  |
| C | 2.884511000  | -1.687620000 | 4.247302000  |
| C | 3.232772000  | -1.757546000 | 2.750614000  |
| C | 3.992786000  | -1.311177000 | 5.237252000  |
| C | 1.619436000  | -0.794641000 | 4.494484000  |
| C | 1.553530000  | 0.556969000  | 3.808074000  |
| O | 1.787673000  | 0.632931000  | 2.586876000  |
| N | 1.157990000  | 1.611345000  | 4.541840000  |
| H | 1.233250000  | -4.864002000 | -4.460539000 |
| H | 1.393772000  | -3.654956000 | -5.743886000 |
| H | -0.200486000 | -4.040017000 | -5.107587000 |
| H | -0.854656000 | -1.742646000 | -4.026095000 |
| H | 0.370107000  | -1.280077000 | -5.219088000 |
| H | 0.478264000  | -0.682920000 | -3.548530000 |
| H | 3.111465000  | -3.400751000 | -3.814582000 |
| H | 4.176613000  | -1.415919000 | -4.785247000 |
| H | 2.666197000  | -0.489445000 | -4.693342000 |
| H | 2.814156000  | -1.861801000 | -5.803396000 |
| H | 5.889137000  | 0.131281000  | 0.090716000  |
| H | 4.466951000  | 0.603844000  | 3.386084000  |
| H | 5.476074000  | 0.660081000  | 1.955719000  |
| H | 5.913451000  | -0.410556000 | 3.286378000  |
| H | 7.114207000  | -1.550450000 | 1.390711000  |
| H | 7.789493000  | -1.398866000 | -0.231854000 |
| H | 6.788095000  | -2.803311000 | 0.189702000  |
| H | 3.786798000  | 0.591914000  | -1.341071000 |
| H | 4.151491000  | 0.216004000  | -3.025359000 |
| H | 5.810597000  | 1.390948000  | -4.085634000 |
| H | 6.777465000  | 2.574782000  | -3.259737000 |
| H | 6.806951000  | -2.381576000 | -2.283291000 |
| H | 7.112740000  | -0.664217000 | -2.535105000 |
| H | 5.972411000  | -1.518811000 | -3.580013000 |
| H | 3.755932000  | -4.291705000 | -1.487633000 |
| H | 5.372343000  | -3.806356000 | -0.957605000 |
| H | 4.954245000  | -3.753289000 | -2.678616000 |
| H | -2.395785000 | -4.499201000 | -2.280657000 |
| H | -1.182321000 | -5.244947000 | -3.330418000 |
| H | -1.652138000 | -3.558931000 | -3.549232000 |
| H | -2.553290000 | -4.869962000 | -0.330769000 |
| H | -1.970549000 | -7.274045000 | 0.067367000  |
| H | -0.240749000 | -6.869645000 | 0.029063000  |
| H | -1.229523000 | -6.689655000 | -1.427656000 |
| H | -1.769621000 | -5.758760000 | 3.539943000  |
| H | -1.037763000 | -6.850716000 | 2.353979000  |
| H | -2.767793000 | -6.464954000 | 2.269902000  |
| H | -2.332647000 | -2.865209000 | 1.239031000  |
| H | -2.328422000 | -3.370650000 | 2.960517000  |
| H | -3.509127000 | -4.061419000 | 1.819617000  |
| H | 0.136737000  | -4.617048000 | 3.792802000  |
| H | 1.660705000  | -3.203564000 | 5.281023000  |
| H | 3.077154000  | -5.196988000 | 4.685209000  |
| H | 3.991020000  | -4.021907000 | 5.642610000  |
| H | 4.247648000  | -4.129963000 | 3.886662000  |
| H | 3.689422000  | -1.621827000 | 6.243372000  |
| H | 4.171137000  | -0.234863000 | 5.269476000  |
| H | 4.936100000  | -1.808715000 | 5.002288000  |
| H | 1.483619000  | -0.701143000 | 5.577618000  |
| H | 0.740620000  | -1.328887000 | 4.106765000  |
| H | 0.824821000  | 2.473577000  | 4.075226000  |
| H | 0.930708000  | 1.485605000  | 5.518811000  |
| H | 2.450883000  | -0.893285000 | -2.208687000 |

### 1C. NpRdhA/DBMP, Co<sup>I</sup> → Co<sup>III</sup> Transition State (Charge = 1, Multiplicity = 1)

|    |              |              |              |
|----|--------------|--------------|--------------|
| C  | 3.611124000  | 7.387625000  | -2.898475000 |
| C  | 6.624390000  | 4.621247000  | 1.038851000  |
| C  | -6.742569000 | -0.640476000 | 3.362143000  |
| C  | -9.960615000 | 3.769895000  | -0.113838000 |
| C  | 0.327426000  | 6.052666000  | 2.106595000  |
| C  | -4.785496000 | -2.281967000 | -5.084501000 |
| Co | 1.389795000  | -2.515155000 | 0.540481000  |
| C  | -1.103218000 | 2.687613000  | -0.405383000 |
| C  | -0.609541000 | 1.797778000  | -1.405656000 |
| C  | -1.415895000 | 1.456725000  | -2.502772000 |
| C  | -2.670827000 | 2.030923000  | -2.723706000 |
| C  | -3.122796000 | 2.981816000  | -1.790939000 |
| C  | -2.353586000 | 3.304120000  | -0.681066000 |
| O  | -0.473119000 | 2.884063000  | 0.736803000  |
| Br | 0.393192000  | -0.381811000 | -0.213758000 |
| Br | -3.045133000 | 4.563544000  | 0.598703000  |
| C  | -3.530620000 | 1.657937000  | -3.908074000 |
| H  | -2.923981000 | 1.247116000  | -4.720825000 |

|   |               |              |              |
|---|---------------|--------------|--------------|
| H | -4.272223000  | 0.898444000  | -3.627938000 |
| H | -4.076241000  | 2.524550000  | -4.294023000 |
| H | -1.018058000  | 0.759960000  | -3.238885000 |
| H | -4.091293000  | 3.454592000  | -1.923543000 |
| C | -4.228912000  | -2.341746000 | -3.683887000 |
| C | -2.952213000  | -1.808930000 | -3.411393000 |
| C | -2.393751000  | -1.886086000 | -2.132949000 |
| C | -3.113611000  | -2.497365000 | -1.093302000 |
| C | -4.395995000  | -3.011310000 | -1.337790000 |
| C | -4.947659000  | -2.932190000 | -2.626372000 |
| H | -5.829802000  | -2.631898000 | -5.126240000 |
| H | -4.189518000  | -2.912784000 | -5.769581000 |
| H | -4.751551000  | -1.251451000 | -5.481708000 |
| H | -2.390231000  | -1.327703000 | -4.218966000 |
| H | -1.398968000  | -1.480552000 | -1.928919000 |
| H | -2.646345000  | -2.588277000 | -0.106910000 |
| H | -4.968335000  | -3.485323000 | -0.531986000 |
| H | -5.946420000  | -3.341169000 | -2.816229000 |
| C | 3.142111000   | 5.959014000  | -2.723714000 |
| C | 4.053336000   | 4.893961000  | -2.690623000 |
| C | 3.632787000   | 3.576511000  | -2.533551000 |
| C | 2.267936000   | 3.258817000  | -2.396104000 |
| C | 1.342293000   | 4.317558000  | -2.466861000 |
| C | 1.783805000   | 5.633714000  | -2.617742000 |
| O | 1.921153000   | 1.972116000  | -2.144232000 |
| H | 0.736170000   | 1.846522000  | -1.751021000 |
| H | 3.852461000   | 7.602496000  | -3.947519000 |
| H | 4.513950000   | 7.584368000  | -2.309392000 |
| H | 2.839676000   | 8.098074000  | -2.585401000 |
| H | 5.119483000   | 5.099271000  | -2.775312000 |
| H | 4.361120000   | 2.773742000  | -2.494949000 |
| H | 0.280325000   | 4.112520000  | -2.382965000 |
| H | 1.042563000   | 6.430384000  | -2.650583000 |
| C | 5.104958000   | 4.811450000  | 1.011994000  |
| C | 4.354557000   | 3.474746000  | 0.954368000  |
| C | 2.844278000   | 3.658022000  | 0.893794000  |
| N | 2.142396000   | 2.367142000  | 0.624720000  |
| H | 2.356735000   | 1.666234000  | 1.350354000  |
| H | 1.077527000   | 2.505654000  | 0.674212000  |
| H | 2.326287000   | 1.999996000  | -0.336733000 |
| H | 6.967166000   | 4.057574000  | 0.153270000  |
| H | 6.938871000   | 4.048962000  | 1.930696000  |
| H | 7.150674000   | 5.591644000  | 1.058484000  |
| H | 4.817797000   | 5.415128000  | 0.129317000  |
| H | 4.776370000   | 5.383782000  | 1.901583000  |
| H | 4.694093000   | 2.914542000  | 0.065424000  |
| H | 4.615939000   | 2.857615000  | 1.835069000  |
| H | 2.561325000   | 4.343215000  | 0.078599000  |
| H | 2.435528000   | 4.040601000  | 1.840632000  |
| C | -5.741889000  | -1.729246000 | 2.967253000  |
| C | -4.722020000  | -1.266677000 | 1.925666000  |
| N | -3.870581000  | -0.193520000 | 2.451058000  |
| C | -3.017503000  | 0.535173000  | 1.692028000  |
| N | -2.965098000  | 0.320381000  | 0.375188000  |
| N | -2.241584000  | 1.466989000  | 2.267642000  |
| H | -3.739479000  | -0.149793000 | 3.459581000  |
| H | -2.297679000  | 0.852641000  | -0.195538000 |
| H | -3.287020000  | -0.556176000 | -0.036193000 |
| H | -2.540386000  | 1.870066000  | 3.150935000  |
| H | -1.537867000  | 2.030504000  | 1.714573000  |
| H | -7.473781000  | -1.022257000 | 4.094193000  |
| H | -7.296564000  | -0.275271000 | 2.479305000  |
| H | -6.238548000  | 0.231752000  | 3.815612000  |
| H | -6.272194000  | -2.598446000 | 2.538536000  |
| H | -5.203799000  | -2.113078000 | 3.857525000  |
| H | -4.090552000  | -2.119095000 | 1.614757000  |
| H | -5.247125000  | -0.885168000 | 1.031862000  |
| C | -8.761627000  | 2.862659000  | -0.326663000 |
| C | -8.854311000  | 1.721259000  | -1.151118000 |
| C | -7.737706000  | 0.907792000  | -1.396837000 |
| C | -6.497035000  | 1.216742000  | -0.816616000 |
| C | -6.389791000  | 2.339423000  | 0.019572000  |
| C | -7.510928000  | 3.150235000  | 0.259737000  |
| H | -10.020475000 | 4.526827000  | -0.918671000 |
| H | -9.892320000  | 4.311173000  | 0.844795000  |
| H | -10.904989000 | 3.199685000  | -0.126869000 |
| H | -9.816360000  | 1.470824000  | -1.613846000 |
| H | -7.835394000  | 0.032324000  | -2.040905000 |
| H | -5.616160000  | 0.599224000  | -1.026155000 |
| H | -5.426584000  | 2.596252000  | 0.474213000  |
| H | -7.409392000  | 4.029534000  | 0.906923000  |
| O | 0.047349000   | 4.738290000  | 2.565522000  |
| H | 1.095437000   | 6.060873000  | 1.307352000  |
| H | 0.711495000   | 6.634339000  | 2.961310000  |
| H | -0.581770000  | 6.554298000  | 1.719679000  |
| H | -0.277396000  | 4.179781000  | 1.805058000  |
| C | 1.593832000   | -4.556082000 | -4.483314000 |
| C | 1.557455000   | -3.322633000 | -3.567318000 |
| C | 0.793641000   | -2.158906000 | -4.240329000 |
| C | 3.022961000   | -2.910699000 | -3.199130000 |
| C | 3.741397000   | -2.081098000 | -4.263176000 |
| C | 2.850899000   | -2.230493000 | -1.839221000 |
| C | 3.917339000   | -2.359505000 | -0.731548000 |
| C | 5.155095000   | -1.397623000 | -0.731404000 |
| C | 5.302745000   | -1.058007000 | 0.796249000  |
| C | 3.892111000   | -1.251773000 | 1.317198000  |
| C | 3.411431000   | -0.759697000 | 2.579812000  |
| C | 4.340127000   | 0.153845000  | 3.353777000  |
| C | 6.350716000   | -1.859877000 | 1.590603000  |
| C | 4.813780000   | -0.076913000 | -1.479548000 |
| C | 6.012378000   | 0.863851000  | -1.563500000 |

|   |              |              |              |
|---|--------------|--------------|--------------|
| N | 6.437702000  | 1.150702000  | -2.827800000 |
| O | 6.584538000  | 1.316884000  | -0.572993000 |
| C | 6.415410000  | -2.017308000 | -1.348700000 |
| C | 4.304067000  | -3.838652000 | -0.536991000 |
| N | 3.145867000  | -1.922530000 | 0.474078000  |
| N | 1.662587000  | -2.897174000 | -1.258920000 |
| C | 0.959687000  | -3.530554000 | -2.166664000 |
| C | -0.206392000 | -4.288766000 | -1.823073000 |
| C | -1.060270000 | -4.893919000 | -2.916953000 |
| C | -0.585295000 | -4.451901000 | -0.506148000 |
| N | -0.098271000 | -3.717780000 | 0.571403000  |
| C | -1.648736000 | -5.440761000 | -0.048795000 |
| C | -1.404145000 | -6.892208000 | -0.494650000 |
| C | -1.707285000 | -5.240070000 | 1.499343000  |
| C | -1.139462000 | -6.429058000 | 2.311283000  |
| C | -3.145399000 | -4.963345000 | 1.970694000  |
| C | -0.772927000 | -4.059120000 | 1.698197000  |
| C | -0.562307000 | -3.477641000 | 2.938608000  |
| C | 0.434155000  | -2.565068000 | 3.254596000  |
| N | 1.342604000  | -2.064713000 | 2.389593000  |
| C | 0.741050000  | -2.135718000 | 4.663999000  |
| C | 1.572195000  | -3.227997000 | 5.366776000  |
| C | 1.507262000  | -0.804755000 | 4.409035000  |
| C | 2.180626000  | -1.156585000 | 3.061500000  |
| C | 2.387520000  | -0.413563000 | 5.602049000  |
| C | 0.395428000  | 0.267794000  | 4.206134000  |
| C | 0.865777000  | 1.686572000  | 3.929092000  |
| O | 1.888061000  | 1.914744000  | 3.275974000  |
| N | 0.085049000  | 2.687522000  | 4.395706000  |
| H | 1.925679000  | -5.444904000 | -3.936445000 |
| H | 2.305722000  | -4.375400000 | -5.296572000 |
| H | 0.628196000  | -4.770505000 | -4.944215000 |
| H | -0.257685000 | -2.422975000 | -4.379370000 |
| H | 1.217462000  | -1.944206000 | -5.226549000 |
| H | 0.836856000  | -1.248118000 | -3.633261000 |
| H | 3.573847000  | -3.848279000 | -3.051717000 |
| H | 4.801706000  | -1.967141000 | -4.018480000 |
| H | 3.301279000  | -1.082994000 | -4.357790000 |
| H | 3.688781000  | -2.569460000 | -5.242090000 |
| H | 5.591342000  | -0.005568000 | 0.870349000  |
| H | 3.787694000  | 0.973377000  | 3.804825000  |
| H | 5.087111000  | 0.593443000  | 2.690980000  |
| H | 4.880355000  | -0.386036000 | 4.139610000  |
| H | 6.351201000  | -1.543498000 | 2.636835000  |
| H | 7.349663000  | -1.672133000 | 1.188163000  |
| H | 6.162587000  | -2.936736000 | 1.569691000  |
| H | 4.001276000  | 0.448635000  | -0.965755000 |
| H | 4.453579000  | -0.294630000 | -2.486264000 |
| H | 5.907657000  | 0.881849000  | -3.644116000 |
| H | 7.184341000  | 1.824878000  | -2.941498000 |
| H | 6.715045000  | -2.935077000 | -0.839680000 |
| H | 7.252021000  | -1.315304000 | -1.286148000 |
| H | 6.256540000  | -2.253619000 | -2.406149000 |
| H | 3.398047000  | -4.444020000 | -0.441898000 |
| H | 4.894863000  | -3.969047000 | 0.371226000  |
| H | 4.887062000  | -4.212532000 | -1.382309000 |
| H | -2.084723000 | -5.040199000 | -2.567169000 |
| H | -0.680149000 | -5.851316000 | -3.289166000 |
| H | -1.121934000 | -4.210103000 | -3.765732000 |
| H | -2.610292000 | -5.119561000 | -0.473435000 |
| H | -2.157905000 | -7.552398000 | -0.054187000 |
| H | -0.415495000 | -7.245299000 | -0.189158000 |
| H | -1.476702000 | -6.995115000 | -1.577497000 |
| H | -1.151722000 | -6.183427000 | 3.377762000  |
| H | -0.105991000 | -6.651651000 | 2.030865000  |
| H | -1.744034000 | -7.329105000 | 2.166340000  |
| H | -3.575105000 | -4.110227000 | 1.438593000  |
| H | -3.184577000 | -4.755370000 | 3.045275000  |
| H | -3.776082000 | -5.837747000 | 1.775415000  |
| H | -1.170884000 | -3.834215000 | 3.764227000  |
| H | -0.173215000 | -1.956963000 | 5.242130000  |
| H | 1.010197000  | -4.166560000 | 5.391485000  |
| H | 1.807930000  | -2.943620000 | 6.396011000  |
| H | 2.509565000  | -3.406979000 | 4.829327000  |
| H | 1.786316000  | -0.481093000 | 6.516758000  |
| H | 2.751012000  | 0.611282000  | 5.522000000  |
| H | 3.246523000  | -1.077995000 | 5.715520000  |
| H | -0.246553000 | 0.255386000  | 5.097583000  |
| H | -0.235427000 | -0.013611000 | 3.351978000  |
| H | 0.174082000  | 3.619413000  | 3.955151000  |
| H | -0.740377000 | 2.482226000  | 4.939545000  |
| H | 2.591515000  | -1.170948000 | -1.955725000 |

#### 1D. NpRdhA/DBMP, Co<sup>III</sup> (Charge = 1, Multiplicity = 1)

|    |               |              |              |
|----|---------------|--------------|--------------|
| C  | 3.065540000   | 7.687582000  | -2.534524000 |
| C  | 6.355525000   | 4.898666000  | 1.157835000  |
| C  | -6.571715000  | -1.379632000 | 3.445425000  |
| C  | -10.161934000 | 3.005105000  | 0.319097000  |
| C  | 0.008059000   | 5.836930000  | 2.449612000  |
| C  | -4.731049000  | -2.376045000 | -5.127243000 |
| Co | 1.590294000   | -2.530719000 | 0.335880000  |
| C  | -1.656435000  | 2.922223000  | -0.365370000 |
| C  | -1.373881000  | 2.205978000  | -1.555490000 |
| C  | -2.306476000  | 2.087305000  | -2.583970000 |
| C  | -3.578872000  | 2.664088000  | -2.494835000 |
| C  | -3.874630000  | 3.396882000  | -1.338187000 |
| C  | -2.940428000  | 3.523938000  | -0.314296000 |
| O  | -0.816085000  | 2.919946000  | 0.660529000  |

|    |               |              |              |
|----|---------------|--------------|--------------|
| Br | 0.236945000   | -0.545006000 | 0.212685000  |
| Br | -3.435739000  | 4.479524000  | 1.272924000  |
| C  | -4.600737000  | 2.513070000  | -3.596169000 |
| H  | -4.417907000  | 1.600846000  | -4.174198000 |
| H  | -5.614828000  | 2.459420000  | -3.187411000 |
| H  | -4.565750000  | 3.360062000  | -4.293021000 |
| H  | -2.038485000  | 1.516401000  | -3.470030000 |
| H  | -4.853991000  | 3.850697000  | -1.221065000 |
| C  | -4.117037000  | -2.334198000 | -3.751822000 |
| C  | -2.967595000  | -1.555738000 | -3.503104000 |
| C  | -2.328152000  | -1.588051000 | -2.259579000 |
| C  | -2.842409000  | -2.392488000 | -1.229150000 |
| C  | -4.018936000  | -3.128123000 | -1.443482000 |
| C  | -4.646988000  | -3.101485000 | -2.696937000 |
| H  | -5.770729000  | -2.742043000 | -5.101255000 |
| H  | -4.156091000  | -3.054659000 | -5.785653000 |
| H  | -4.725706000  | -1.380258000 | -5.603757000 |
| H  | -2.562234000  | -0.929165000 | -4.305938000 |
| H  | -1.424455000  | -0.999562000 | -2.075440000 |
| H  | -2.299115000  | -2.447193000 | -0.279017000 |
| H  | -4.449489000  | -3.737157000 | -0.641340000 |
| H  | -5.555212000  | -3.691715000 | -2.862656000 |
| C  | 2.915696000   | 6.190435000  | -2.594439000 |
| C  | 4.038208000   | 5.352663000  | -2.746031000 |
| C  | 3.925863000   | 3.973598000  | -2.705687000 |
| C  | 2.668839000   | 3.331271000  | -2.464534000 |
| C  | 1.526073000   | 4.194483000  | -2.407356000 |
| C  | 1.658722000   | 5.572765000  | -2.459370000 |
| O  | 2.582197000   | 2.055654000  | -2.226912000 |
| H  | -0.407376000  | 1.715807000  | -1.632161000 |
| H  | 3.832972000   | 8.043609000  | -3.230735000 |
| H  | 3.369754000   | 8.010356000  | -1.528524000 |
| H  | 2.124580000   | 8.194077000  | -2.770519000 |
| H  | 5.019590000   | 5.805378000  | -2.880371000 |
| H  | 4.808556000   | 3.346969000  | -2.786213000 |
| H  | 0.546672000   | 3.742548000  | -2.284114000 |
| H  | 0.769571000   | 6.195879000  | -2.376993000 |
| C  | 4.817315000   | 4.948157000  | 1.195556000  |
| C  | 4.127299000   | 3.615801000  | 0.842718000  |
| C  | 2.603758000   | 3.756914000  | 0.848095000  |
| N  | 1.886805000   | 2.508047000  | 0.431519000  |
| H  | 2.041399000   | 1.755074000  | 1.124498000  |
| H  | 0.831124000   | 2.658502000  | 0.437277000  |
| H  | 2.154093000   | 2.187822000  | -0.544322000 |
| H  | 6.715034000   | 4.632983000  | 0.147478000  |
| H  | 6.750941000   | 4.138734000  | 1.853717000  |
| H  | 6.785811000   | 5.878248000  | 1.428696000  |
| H  | 4.460309000   | 5.722222000  | 0.487890000  |
| H  | 4.482432000   | 5.272344000  | 2.200622000  |
| H  | 4.454382000   | 3.296948000  | -0.162154000 |
| H  | 4.439098000   | 2.825609000  | 1.551533000  |
| H  | 2.290871000   | 4.544839000  | 0.145084000  |
| H  | 2.220620000   | 4.009475000  | 1.848869000  |
| C  | -5.432414000  | -2.297501000 | 2.989407000  |
| C  | -4.514383000  | -1.686694000 | 1.923977000  |
| N  | -3.713899000  | -0.574607000 | 2.455044000  |
| C  | -3.051687000  | 0.327750000  | 1.685249000  |
| N  | -3.196399000  | 0.290384000  | 0.355022000  |
| N  | -2.287085000  | 1.265283000  | 2.253522000  |
| H  | -3.406417000  | -0.652390000 | 3.422887000  |
| H  | -2.689875000  | 0.976503000  | -0.220187000 |
| H  | -3.425266000  | -0.584470000 | -0.117721000 |
| H  | -2.421400000  | 1.498673000  | 3.231982000  |
| H  | -1.677735000  | 1.918898000  | 1.679549000  |
| H  | -7.199062000  | -1.878183000 | 4.203024000  |
| H  | -7.215349000  | -1.098210000 | 2.593591000  |
| H  | -6.183282000  | -0.444536000 | 3.887009000  |
| H  | -5.846872000  | -3.226790000 | 2.557783000  |
| H  | -4.817150000  | -2.619216000 | 3.854431000  |
| H  | -3.839526000  | -2.467326000 | 1.524314000  |
| H  | -5.120822000  | -1.299447000 | 1.086275000  |
| C  | -8.906559000  | 2.224972000  | -0.020173000 |
| C  | -8.913497000  | 1.258906000  | -1.048259000 |
| C  | -7.746072000  | 0.565979000  | -1.401055000 |
| C  | -6.541543000  | 0.823679000  | -0.728029000 |
| C  | -6.518987000  | 1.772651000  | 0.306135000  |
| C  | -7.690619000  | 2.463342000  | 0.654022000  |
| H  | -10.272296000 | 3.875443000  | -0.355254000 |
| H  | -10.132671000 | 3.389070000  | 1.352641000  |
| H  | -11.066214000 | 2.383485000  | 0.203323000  |
| H  | -9.847886000  | 1.051441000  | -1.583175000 |
| H  | -7.774546000  | -0.174104000 | -2.208898000 |
| H  | -5.622943000  | 0.304917000  | -1.021097000 |
| H  | -5.582997000  | 1.990093000  | 0.831783000  |
| H  | -7.657737000  | 3.208767000  | 1.457438000  |
| O  | -0.097152000  | 4.440856000  | 2.702017000  |
| H  | 0.684391000   | 6.054008000  | 1.597662000  |
| H  | 0.425329000   | 6.314792000  | 3.351965000  |
| H  | -0.979936000  | 6.288831000  | 2.234669000  |
| H  | -0.503912000  | 3.994102000  | 1.903035000  |
| C  | 1.883508000   | -3.293896000 | -5.023646000 |
| C  | 1.792103000   | -2.337264000 | -3.824683000 |
| C  | 0.957234000   | -1.083465000 | -4.177634000 |
| C  | 3.241571000   | -1.948869000 | -3.364806000 |
| C  | 3.894676000   | -0.825870000 | -4.172469000 |

|   |              |              |              |
|---|--------------|--------------|--------------|
| C | 3.059330000  | -1.641267000 | -1.876485000 |
| C | 4.126191000  | -2.039730000 | -0.826018000 |
| C | 5.370536000  | -1.121241000 | -0.565748000 |
| C | 5.478397000  | -1.151446000 | 1.001190000  |
| C | 4.047129000  | -1.405844000 | 1.418337000  |
| C | 3.493539000  | -1.117125000 | 2.710455000  |
| C | 4.323196000  | -0.253250000 | 3.637148000  |
| C | 6.457390000  | -2.154306000 | 1.639896000  |
| C | 5.058337000  | 0.349044000  | -0.965377000 |
| C | 6.261621000  | 1.259961000  | -0.747826000 |
| N | 6.822112000  | 1.763688000  | -1.883928000 |
| O | 6.729207000  | 1.506155000  | 0.364082000  |
| C | 6.643599000  | -1.588483000 | -1.281409000 |
| C | 4.508963000  | -3.522994000 | -0.994848000 |
| N | 3.331580000  | -1.893267000 | 0.434343000  |
| N | 1.894355000  | -2.471746000 | -1.489675000 |
| C | 1.225914000  | -2.922117000 | -2.519593000 |
| C | 0.121095000  | -3.828334000 | -2.357610000 |
| C | -0.693952000 | -4.227248000 | -3.567939000 |
| C | -0.231233000 | -4.320338000 | -1.115315000 |
| N | 0.219253000  | -3.820040000 | 0.100472000  |
| C | -1.240641000 | -5.435496000 | -0.882116000 |
| C | -0.952217000 | -6.739397000 | -1.644042000 |
| C | -1.277568000 | -5.589566000 | 0.674246000  |
| C | -0.563471000 | -6.862389000 | 1.191824000  |
| C | -2.717775000 | -5.571850000 | 1.211922000  |
| C | -0.453031000 | -4.399123000 | 1.124706000  |
| C | -0.354632000 | -3.998857000 | 2.451395000  |
| C | 0.546596000  | -3.070920000 | 2.960443000  |
| N | 1.508495000  | -2.465801000 | 2.237368000  |
| C | 0.665067000  | -2.710539000 | 4.420234000  |
| C | 1.421380000  | -3.819583000 | 5.177648000  |
| C | 1.428211000  | -1.350814000 | 4.330824000  |
| C | 2.246661000  | -1.596387000 | 3.050752000  |
| C | 2.158617000  | -1.009538000 | 5.634148000  |
| C | 0.339477000  | -0.267525000 | 4.046489000  |
| C | 0.835203000  | 1.143192000  | 3.746425000  |
| O | 1.784441000  | 1.342152000  | 2.982264000  |
| N | 0.140003000  | 2.162671000  | 4.302681000  |
| H | 2.263398000  | -4.275636000 | -4.721475000 |
| H | 2.580398000  | -2.875262000 | -5.758252000 |
| H | 0.926571000  | -3.431240000 | -5.530990000 |
| H | -0.085977000 | -1.358533000 | -4.358885000 |
| H | 1.344839000  | -0.617447000 | -5.088831000 |
| H | 0.986047000  | -0.342745000 | -3.371792000 |
| H | 3.843423000  | -2.861485000 | -3.464685000 |
| H | 4.962207000  | -0.758095000 | -3.937758000 |
| H | 3.433035000  | 0.143183000  | -3.953867000 |
| H | 3.817456000  | -1.019469000 | -5.247900000 |
| H | 5.801715000  | -0.156437000 | 1.318678000  |
| H | 3.720431000  | 0.551105000  | 4.054828000  |
| H | 5.143101000  | 0.216156000  | 3.092904000  |
| H | 4.761423000  | -0.832424000 | 4.457186000  |
| H | 6.411501000  | -2.069268000 | 2.730110000  |
| H | 7.481698000  | -1.927230000 | 1.332470000  |
| H | 6.235388000  | -3.192347000 | 1.377655000  |
| H | 4.237462000  | 0.731911000  | -0.351993000 |
| H | 4.720545000  | 0.414368000  | -1.999545000 |
| H | 6.410935000  | 1.617260000  | -2.794055000 |
| H | 7.605147000  | 2.399038000  | -1.799485000 |
| H | 6.929420000  | -2.603834000 | -0.999621000 |
| H | 7.479888000  | -0.928573000 | -1.032216000 |
| H | 6.511752000  | -1.562665000 | -2.368812000 |
| H | 3.604684000  | -4.133866000 | -1.063346000 |
| H | 5.090426000  | -3.873271000 | -0.140820000 |
| H | 5.102045000  | -3.675894000 | -1.899893000 |
| H | -1.707226000 | -4.513693000 | -3.276146000 |
| H | -0.248365000 | -5.051171000 | -4.136110000 |
| H | -0.795256000 | -3.376202000 | -4.243378000 |
| H | -2.221500000 | -5.065240000 | -1.209955000 |
| H | -1.666241000 | -7.513721000 | -1.345641000 |
| H | 0.057901000  | -7.106525000 | -1.444164000 |
| H | -1.053410000 | -6.602978000 | -2.721067000 |
| H | -0.544100000 | -6.850049000 | 2.286178000  |
| H | 0.470192000  | -6.915722000 | 0.837857000  |
| H | -1.090519000 | -7.766037000 | 0.871769000  |
| H | -3.217031000 | -4.630452000 | 0.967587000  |
| H | -2.742168000 | -5.701684000 | 2.299059000  |
| H | -3.292422000 | -6.391631000 | 0.767150000  |
| H | -1.000899000 | -4.496965000 | 3.167795000  |
| H | -0.322036000 | -2.573651000 | 4.878201000  |
| H | 0.885536000  | -4.768871000 | 5.081383000  |
| H | 1.509239000  | -3.584772000 | 6.242050000  |
| H | 2.426366000  | -3.953723000 | 4.763671000  |
| H | 1.457262000  | -1.119971000 | 6.469781000  |
| H | 2.516599000  | 0.021129000  | 5.641736000  |
| H | 3.007358000  | -1.671122000 | 5.818669000  |
| H | -0.351940000 | -0.262139000 | 4.900208000  |
| H | -0.231187000 | -0.555889000 | 3.151703000  |
| H | 0.221007000  | 3.113848000  | 3.905428000  |
| H | -0.599050000 | 1.980780000  | 4.966108000  |
| H | 2.779825000  | -0.591229000 | -1.722094000 |

2A. NpRdhA/DCMP, Co<sup>II</sup> (Charge = 2, Multiplicity = 2)



|    |               |              |              |
|----|---------------|--------------|--------------|
| C  | 3.111172000   | 7.726287000  | -1.171983000 |
| C  | 6.404368000   | 4.460264000  | 2.102812000  |
| C  | -6.487214000  | -2.164915000 | 3.398524000  |
| C  | -10.094830000 | 2.597627000  | 0.910011000  |
| C  | 0.044287000   | 5.162693000  | 3.479714000  |
| C  | -4.599918000  | -1.914854000 | -5.218469000 |
| Co | 1.697445000   | -2.806538000 | 0.201814000  |
| C  | -1.393458000  | 2.626038000  | -0.058047000 |
| C  | -1.163730000  | 1.663162000  | -1.071291000 |
| C  | -1.637057000  | 1.794421000  | -2.376263000 |
| C  | -2.413688000  | 2.897631000  | -2.747003000 |
| C  | -2.681896000  | 3.865209000  | -1.769761000 |
| C  | -2.183460000  | 3.727526000  | -0.479775000 |
| O  | -0.914796000  | 2.501576000  | 1.162117000  |
| Cl | -0.232463000  | 0.229953000  | -0.643212000 |
| Cl | -2.510279000  | 4.970684000  | 0.708181000  |
| C  | -2.984442000  | 3.016382000  | -4.139172000 |
| H  | -2.430082000  | 2.394498000  | -4.848259000 |
| H  | -4.032662000  | 2.692724000  | -4.156122000 |
| H  | -2.954144000  | 4.050314000  | -4.495333000 |
| H  | -1.415453000  | 1.014534000  | -3.097131000 |
| H  | -3.280995000  | 4.737470000  | -2.013157000 |
| C  | -4.655451000  | -1.874780000 | -3.708881000 |
| C  | -3.939677000  | -0.903644000 | -2.981913000 |
| C  | -3.967788000  | -0.876497000 | -1.580091000 |
| C  | -4.728739000  | -1.823085000 | -0.880353000 |
| C  | -5.446061000  | -2.801803000 | -1.586593000 |
| C  | -5.407331000  | -2.826452000 | -2.987996000 |
| H  | -5.995690000  | -2.081824000 | -5.654767000 |
| H  | -3.955174000  | -2.745306000 | -5.564727000 |
| H  | -4.193864000  | -0.978081000 | -5.634741000 |
| H  | -3.366408000  | -0.146475000 | -3.526917000 |
| H  | -3.415928000  | -0.100817000 | -1.039349000 |
| H  | -4.788493000  | -1.775926000 | 0.209146000  |
| H  | -6.051855000  | -3.537426000 | -1.045824000 |
| H  | -5.977378000  | -3.587413000 | -3.532928000 |
| C  | 2.744111000   | 6.306139000  | -1.524143000 |
| C  | 3.736502000   | 5.355739000  | -1.807470000 |
| C  | 3.417795000   | 4.039971000  | -2.133242000 |
| C  | 2.079028000   | 3.650518000  | -2.179023000 |
| C  | 1.068289000   | 4.576203000  | -1.920254000 |
| C  | 1.408906000   | 5.890809000  | -1.594945000 |
| O  | 1.805638000   | 2.312242000  | -2.433595000 |
| H  | 0.836856000   | 2.207522000  | -2.482735000 |
| H  | 3.496477000   | 8.260879000  | -2.048324000 |
| H  | 3.893145000   | 7.755036000  | -0.404987000 |
| H  | 2.245619000   | 8.280284000  | -0.798259000 |
| H  | 4.783340000   | 5.647514000  | -1.769668000 |
| H  | 4.197552000   | 3.318805000  | -2.351040000 |
| H  | 0.024836000   | 4.274859000  | -1.968623000 |
| H  | 0.613383000   | 6.603155000  | -1.389845000 |
| C  | 4.915407000   | 4.718375000  | 1.837776000  |
| C  | 4.132577000   | 3.444813000  | 1.472411000  |
| C  | 2.648819000   | 3.747560000  | 1.286113000  |
| N  | 1.862079000   | 2.538073000  | 0.874345000  |
| H  | 1.958208000   | 1.736437000  | 1.560761000  |
| H  | 0.820873000   | 2.700156000  | 0.891879000  |
| H  | 2.110745000   | 2.213612000  | -0.072063000 |
| H  | 6.888342000   | 4.000655000  | 1.222901000  |
| H  | 6.542642000   | 3.773453000  | 2.957775000  |
| H  | 6.933433000   | 5.399310000  | 2.337570000  |
| H  | 4.802919000   | 5.449039000  | 1.013573000  |
| H  | 4.452917000   | 5.187808000  | 2.728338000  |
| H  | 4.554844000   | 3.002499000  | 0.551746000  |
| H  | 4.255932000   | 2.689318000  | 2.273064000  |
| H  | 2.486796000   | 4.518212000  | 0.516342000  |
| H  | 2.190232000   | 4.086283000  | 2.225290000  |
| C  | -6.776211000  | -0.953999000 | 2.500028000  |
| C  | -5.830341000  | 0.234653000  | 2.705524000  |
| N  | -4.431757000  | -0.145977000 | 2.423896000  |
| C  | -3.404083000  | 0.713731000  | 2.291091000  |
| N  | -3.621817000  | 2.038852000  | 2.275311000  |
| N  | -2.131582000  | 0.273740000  | 2.217298000  |
| H  | -4.190464000  | -1.127780000 | 2.551392000  |
| H  | -2.826048000  | 2.645574000  | 2.043454000  |
| H  | -4.560029000  | 2.405021000  | 2.116501000  |
| H  | -1.950761000  | -0.717973000 | 2.083770000  |
| H  | -1.427547000  | 0.954021000  | 1.846043000  |
| H  | -7.239851000  | -2.954562000 | 3.238433000  |
| H  | -6.508993000  | -1.888703000 | 4.467523000  |
| H  | -5.500885000  | -2.623588000 | 3.189441000  |
| H  | -7.795926000  | -0.580156000 | 2.696871000  |
| H  | -6.759001000  | -1.243356000 | 1.433391000  |
| H  | -6.120675000  | 1.043757000  | 2.013681000  |
| H  | -5.902777000  | 0.616090000  | 3.742916000  |
| C  | -8.640929000  | 2.440225000  | 0.507084000  |
| C  | -8.212649000  | 1.322940000  | -0.242779000 |
| C  | -6.889634000  | 1.210122000  | -0.697133000 |
| C  | -5.955588000  | 2.217970000  | -0.406436000 |
| C  | -6.357964000  | 3.328452000  | 0.356713000  |
| C  | -7.683946000  | 3.431860000  | 0.812309000  |
| H  | -10.660122000 | 3.099389000  | 0.102563000  |
| H  | -10.200545000 | 3.212844000  | 1.818999000  |
| H  | -10.573885000 | 1.620217000  | 1.088219000  |
| H  | -8.935152000  | 0.536343000  | -0.490513000 |

|   |              |              |              |
|---|--------------|--------------|--------------|
| H | -6.587816000 | 0.340033000  | -1.289269000 |
| H | -4.927946000 | 2.145969000  | -0.780067000 |
| H | -5.645544000 | 4.134438000  | 0.572550000  |
| H | -7.988310000 | 4.310590000  | 1.392624000  |
| O | 0.122879000  | 3.750800000  | 3.274169000  |
| H | 0.361003000  | 5.726409000  | 2.580630000  |
| H | 0.721771000  | 5.415254000  | 4.311357000  |
| H | -0.980567000 | 5.479530000  | 3.751797000  |
| H | -0.433770000 | 3.480119000  | 2.496314000  |
| C | 0.671264000  | -3.467212000 | -5.033117000 |
| C | 0.948001000  | -2.442377000 | -3.918559000 |
| C | 0.243854000  | -1.102238000 | -4.228915000 |
| C | 2.498065000  | -2.257760000 | -3.769092000 |
| C | 3.133642000  | -1.302240000 | -4.777701000 |
| C | 2.648403000  | -1.862886000 | -2.299087000 |
| C | 3.909151000  | -2.221787000 | -1.475474000 |
| C | 5.136162000  | -1.230918000 | -1.475198000 |
| C | 5.548315000  | -1.205765000 | 0.040217000  |
| C | 4.261744000  | -1.570351000 | 0.744158000  |
| C | 4.003502000  | -1.370327000 | 2.142927000  |
| C | 4.906542000  | -0.406008000 | 2.885965000  |
| C | 6.704726000  | -2.126985000 | 0.477241000  |
| C | 4.663750000  | 0.204060000  | -1.860158000 |
| C | 5.771245000  | 1.249535000  | -1.776197000 |
| N | 6.285248000  | 1.668488000  | -2.965276000 |
| O | 6.166943000  | 1.705229000  | -0.702160000 |
| C | 6.278050000  | -1.654396000 | -2.406207000 |
| C | 4.305135000  | -3.688140000 | -1.721767000 |
| N | 3.394455000  | -2.108470000 | -0.076599000 |
| N | 1.528276000  | -2.588140000 | -1.641014000 |
| C | 0.573363000  | -2.888925000 | -2.494013000 |
| C | -0.643227000 | -3.528472000 | -2.083563000 |
| C | -1.724499000 | -3.806833000 | -3.105667000 |
| C | -0.846029000 | -3.921048000 | -0.776371000 |
| N | 0.006589000  | -3.679354000 | 0.296818000  |
| C | -1.996730000 | -4.805546000 | -0.323510000 |
| C | -1.779903000 | -6.241816000 | -0.842343000 |
| C | -1.950587000 | -4.670174000 | 1.223239000  |
| C | -2.315231000 | -5.935940000 | 2.009088000  |
| C | -2.886245000 | -3.513558000 | 1.657453000  |
| C | -0.527326000 | -4.187513000 | 1.437117000  |
| C | 0.095510000  | -4.167306000 | 2.678212000  |
| C | 1.275708000  | -3.497473000 | 2.969139000  |
| N | 2.010761000  | -2.801087000 | 2.071933000  |
| C | 1.887601000  | -3.386516000 | 4.340297000  |
| C | 2.903647000  | -4.520660000 | 4.574158000  |
| C | 2.521676000  | -1.962016000 | 4.226785000  |
| C | 2.934680000  | -1.991741000 | 2.745559000  |
| C | 3.606153000  | -1.722929000 | 5.282932000  |
| C | 1.324048000  | -0.974477000 | 4.458442000  |
| C | 1.404109000  | 0.399689000  | 3.821556000  |
| O | 1.657947000  | 0.488998000  | 2.605050000  |
| N | 1.115616000  | 1.465135000  | 4.588777000  |
| H | 0.948273000  | -4.479220000 | -4.720964000 |
| H | 1.275946000  | -3.208614000 | -5.909393000 |
| H | -0.371853000 | -3.473357000 | -5.353428000 |
| H | -0.842752000 | -1.214024000 | -4.173883000 |
| H | 0.498000000  | -0.767505000 | -5.239344000 |
| H | 0.540956000  | -0.324931000 | -3.518509000 |
| H | 2.933052000  | -3.256150000 | -3.903258000 |
| H | 4.225406000  | -1.343851000 | -4.717495000 |
| H | 2.819531000  | -0.267169000 | -4.607134000 |
| H | 2.859854000  | -1.574891000 | -5.801816000 |
| H | 5.843707000  | -0.183120000 | 0.291228000  |
| H | 4.318639000  | 0.266966000  | 3.513023000  |
| H | 5.458934000  | 0.220065000  | 2.183457000  |
| H | 5.639848000  | -0.910102000 | 3.523669000  |
| H | 6.875276000  | -2.018342000 | 1.552235000  |
| H | 7.629403000  | -1.846520000 | -0.033541000 |
| H | 6.501650000  | -3.182756000 | 0.278040000  |
| H | 3.875996000  | 0.527709000  | -1.172039000 |
| H | 4.238225000  | 0.197055000  | -2.866279000 |
| H | 5.991878000  | 1.281461000  | -3.850520000 |
| H | 7.052809000  | 2.328947000  | -2.958781000 |
| H | 6.654534000  | -2.651503000 | -2.171840000 |
| H | 7.117485000  | -0.957841000 | -2.319659000 |
| H | 5.954877000  | -1.655539000 | -3.452666000 |
| H | 3.423819000  | -4.329732000 | -1.613880000 |
| H | 5.052509000  | -4.016172000 | -0.997274000 |
| H | 4.712192000  | -3.830250000 | -2.725819000 |
| H | -2.696238000 | -3.937012000 | -2.628424000 |
| H | -1.515314000 | -4.701596000 | -3.702214000 |
| H | -1.831945000 | -2.968689000 | -3.795353000 |
| H | -2.953346000 | -4.431511000 | -0.703352000 |
| H | -2.586961000 | -6.902261000 | -0.513834000 |
| H | -0.828736000 | -6.648391000 | -0.483514000 |
| H | -1.760460000 | -6.252319000 | -1.934369000 |
| H | -2.321028000 | -5.734672000 | 3.085265000  |
| H | -1.614322000 | -6.752427000 | 1.820519000  |
| H | -3.320358000 | -6.272609000 | 1.736074000  |
| H | -2.678320000 | -2.617918000 | 1.060661000  |
| H | -2.748018000 | -3.291387000 | 2.722507000  |
| H | -3.930678000 | -3.796261000 | 1.488819000  |
| H | -0.409180000 | -4.658077000 | 3.503377000  |
| H | 1.126761000  | -3.412110000 | 5.128433000  |

|   |             |              |              |
|---|-------------|--------------|--------------|
| H | 2.402397000 | -5.490687000 | 4.510955000  |
| H | 3.358704000 | -4.438047000 | 5.564869000  |
| H | 3.697386000 | -4.494752000 | 3.820333000  |
| H | 3.223715000 | -2.039837000 | 6.259713000  |
| H | 3.878915000 | -0.669319000 | 5.365282000  |
| H | 4.510750000 | -2.297778000 | 5.073726000  |
| H | 1.148446000 | -0.910161000 | 5.537837000  |
| H | 0.422930000 | -1.417470000 | 4.012169000  |
| H | 0.875469000 | 2.373481000  | 4.155372000  |
| H | 0.866177000 | 1.330036000  | 5.559081000  |
| H | 2.442771000 | -0.792764000 | -2.174656000 |

## 2B. NpRdhA/DCMP, Co<sup>I</sup> (Charge = 1, Multiplicity = 1)

|    |              |              |              |
|----|--------------|--------------|--------------|
| C  | 3.771046000  | 7.438651000  | -2.150048000 |
| C  | 6.596248000  | 4.258353000  | 1.610062000  |
| C  | -6.993244000 | -0.685864000 | 3.230348000  |
| C  | -9.977384000 | 4.102677000  | 0.059071000  |
| C  | 0.329501000  | 5.826102000  | 2.663556000  |
| C  | -4.900861000 | -1.714085000 | -5.280349000 |
| Co | 1.132021000  | -2.620616000 | 0.430163000  |
| C  | -0.925349000 | 2.551894000  | -0.489718000 |
| C  | -0.603507000 | 1.452060000  | -1.322823000 |
| C  | -0.926983000 | 1.404531000  | -2.675898000 |
| C  | -1.630849000 | 2.449299000  | -3.286542000 |
| C  | -1.985794000 | 3.544871000  | -2.493186000 |
| C  | -1.635633000 | 3.586172000  | -1.146624000 |
| O  | -0.603713000 | 2.600559000  | 0.793205000  |
| Cl | 0.193196000  | 0.028736000  | -0.587297000 |
| Cl | -2.063312000 | 5.001328000  | -0.198019000 |
| C  | -2.037025000 | 2.360398000  | -4.737529000 |
| H  | -1.246201000 | 1.905165000  | -5.342593000 |
| H  | -2.936268000 | 1.740858000  | -4.848012000 |
| H  | -2.257770000 | 3.348586000  | -5.150512000 |
| H  | -0.650849000 | 0.528217000  | -3.253436000 |
| H  | -2.531227000 | 4.380155000  | -2.921889000 |
| C  | -4.495373000 | -1.619939000 | -3.827689000 |
| C  | -3.151727000 | -1.376483000 | -3.480438000 |
| C  | -2.738659000 | -1.356811000 | -2.143785000 |
| C  | -3.675258000 | -1.554901000 | -1.120786000 |
| C  | -5.021293000 | -1.779243000 | -1.444117000 |
| C  | -5.426130000 | -1.813398000 | -2.787727000 |
| H  | -5.991668000 | -1.616798000 | -5.407950000 |
| H  | -4.600775000 | -2.691001000 | -5.704387000 |
| H  | -4.410549000 | -0.932050000 | -5.886443000 |
| H  | -2.416345000 | -1.215971000 | -4.276965000 |
| H  | -1.687612000 | -1.209917000 | -1.890025000 |
| H  | -3.338150000 | -1.556509000 | -0.080961000 |
| H  | -5.763238000 | -1.945040000 | -0.653795000 |
| H  | -6.477968000 | -1.998473000 | -3.033531000 |
| C  | 3.413600000  | 5.971151000  | -2.161668000 |
| C  | 4.408439000  | 4.983567000  | -2.110261000 |
| C  | 4.096804000  | 3.626326000  | -2.142167000 |
| C  | 2.760420000  | 3.233537000  | -2.224583000 |
| C  | 1.749586000  | 4.192878000  | -2.290856000 |
| C  | 2.083248000  | 5.547374000  | -2.254331000 |
| O  | 2.483219000  | 1.876700000  | -2.195338000 |
| H  | 1.519252000  | 1.759361000  | -2.302668000 |
| H  | 4.160467000  | 7.756168000  | -3.125341000 |
| H  | 4.544690000  | 7.654212000  | -1.404959000 |
| H  | 2.897869000  | 8.057775000  | -1.923936000 |
| H  | 5.452611000  | 5.280013000  | -2.039492000 |
| H  | 4.877910000  | 2.874709000  | -2.097514000 |
| H  | 0.710075000  | 3.884504000  | -2.363632000 |
| H  | 1.285514000  | 6.285387000  | -2.299844000 |
| C  | 5.081652000  | 4.488413000  | 1.565175000  |
| C  | 4.298457000  | 3.173435000  | 1.443447000  |
| C  | 2.802454000  | 3.406941000  | 1.280323000  |
| N  | 2.072240000  | 2.120679000  | 1.037720000  |
| H  | 2.151544000  | 1.508946000  | 1.880935000  |
| H  | 1.026293000  | 2.287658000  | 0.920992000  |
| H  | 2.409900000  | 1.630480000  | 0.196063000  |
| H  | 6.941052000  | 3.731017000  | 0.703534000  |
| H  | 6.878029000  | 3.633767000  | 2.476712000  |
| H  | 7.143293000  | 5.213938000  | 1.689376000  |
| H  | 4.828231000  | 5.133903000  | 0.701952000  |
| H  | 4.750334000  | 5.034194000  | 2.470099000  |
| H  | 4.682972000  | 2.605171000  | 0.577466000  |
| H  | 4.476693000  | 2.543488000  | 2.334929000  |
| H  | 2.588691000  | 4.065627000  | 0.422366000  |
| H  | 2.346398000  | 3.835873000  | 2.184340000  |
| C  | -5.578964000 | -1.182026000 | 3.558819000  |
| C  | -4.586302000 | -1.016005000 | 2.399724000  |
| N  | -4.400243000 | 0.394038000  | 2.040854000  |
| C  | -3.229935000 | 1.034529000  | 1.864916000  |
| N  | -2.051728000 | 0.381967000  | 1.847759000  |
| N  | -3.205546000 | 2.373389000  | 1.760504000  |
| H  | -5.245903000 | 0.946267000  | 1.886348000  |
| H  | -1.239686000 | 0.950048000  | 1.542752000  |
| H  | -2.007822000 | -0.618585000 | 1.656729000  |
| H  | -4.067358000 | 2.910620000  | 1.703744000  |
| H  | -2.308389000 | 2.808109000  | 1.475228000  |
| H  | -7.680686000 | -0.878180000 | 4.070714000  |
| H  | -7.398425000 | -1.197023000 | 2.338169000  |
| H  | -7.022249000 | 0.402452000  | 3.035660000  |

|   |               |              |              |
|---|---------------|--------------|--------------|
| H | -5.610497000  | -2.258919000 | 3.805294000  |
| H | -5.183883000  | -0.661297000 | 4.450887000  |
| H | -3.607392000  | -1.441701000 | 2.673609000  |
| H | -4.949475000  | -1.569996000 | 1.516749000  |
| C | -8.598365000  | 3.472753000  | -0.032238000 |
| C | -8.438661000  | 2.070889000  | -0.070393000 |
| C | -7.173930000  | 1.486152000  | -0.243384000 |
| C | -6.031168000  | 2.294271000  | -0.374988000 |
| C | -6.168517000  | 3.691469000  | -0.305227000 |
| C | -7.437243000  | 4.268629000  | -0.134079000 |
| H | -10.399836000 | 4.244940000  | -0.953390000 |
| H | -9.938389000  | 5.092467000  | 0.543881000  |
| H | -10.677325000 | 3.463076000  | 0.622613000  |
| H | -9.322535000  | 1.427801000  | 0.015152000  |
| H | -7.081850000  | 0.395840000  | -0.308359000 |
| H | -5.051888000  | 1.841308000  | -0.570585000 |
| H | -5.287422000  | 4.335364000  | -0.414465000 |
| H | -7.531007000  | 5.360298000  | -0.098275000 |
| O | -0.056698000  | 4.460164000  | 2.744272000  |
| H | 1.223754000   | 5.970734000  | 2.024499000  |
| H | 0.575728000   | 6.156864000  | 3.685490000  |
| H | -0.486366000  | 6.464989000  | 2.272443000  |
| H | -0.301408000  | 4.080767000  | 1.863027000  |
| C | 1.422730000   | -4.239413000 | -4.712263000 |
| C | 1.453887000   | -3.058693000 | -3.726559000 |
| C | 0.904471000   | -1.778412000 | -4.394756000 |
| C | 2.923128000   | -2.853069000 | -3.230072000 |
| C | 3.820585000   | -2.066860000 | -4.186387000 |
| C | 2.727079000   | -2.239342000 | -1.843016000 |
| C | 3.705028000   | -2.542334000 | -0.690300000 |
| C | 5.023002000   | -1.699672000 | -0.551230000 |
| C | 5.107534000   | -1.476780000 | 0.998531000  |
| C | 3.654292000   | -1.580937000 | 1.426439000  |
| C | 3.149080000   | -1.161881000 | 2.697098000  |
| C | 4.100157000   | -0.380282000 | 3.584856000  |
| C | 6.028966000   | -2.429596000 | 1.784750000  |
| C | 4.838556000   | -0.307006000 | -1.221106000 |
| C | 6.081722000   | 0.567833000  | -1.148936000 |
| N | 6.722465000   | 0.767517000  | -2.339030000 |
| O | 6.487430000   | 1.084368000  | -0.107977000 |
| C | 6.263650000   | -2.382547000 | -1.141450000 |
| C | 3.954433000   | -4.059524000 | -0.595236000 |
| N | 2.895562000   | -2.129033000 | 0.495436000  |
| N | 1.435892000   | -2.798197000 | -1.373875000 |
| C | 0.731369000   | -3.276166000 | -2.386038000 |
| C | -0.540183000  | -3.890133000 | -2.185913000 |
| C | -1.366413000  | -4.304170000 | -3.386769000 |
| C | -1.056854000  | -4.073057000 | -0.916127000 |
| N | -0.538255000  | -3.518528000 | 0.253166000  |
| C | -2.334067000  | -4.854329000 | -0.622720000 |
| C | -2.434489000  | -6.261576000 | -1.235621000 |
| C | -2.415329000  | -4.850381000 | 0.934556000  |
| C | -1.980350000  | -6.191049000 | 1.578721000  |
| C | -3.831073000  | -4.506566000 | 1.420736000  |
| C | -1.355496000  | -3.825428000 | 1.297066000  |
| C | -1.136061000  | -3.413757000 | 2.605808000  |
| C | -0.030321000  | -2.713985000 | 3.064617000  |
| N | 0.976294000   | -2.238820000 | 2.283281000  |
| C | 0.300200000   | -2.538709000 | 4.524402000  |
| C | 1.016064000   | -3.797348000 | 5.051063000  |
| C | 1.193447000   | -1.265250000 | 4.462108000  |
| C | 1.865521000   | -1.501732000 | 3.086962000  |
| C | 2.086935000   | -1.120546000 | 5.699372000  |
| C | 0.159310000   | -0.108377000 | 4.431918000  |
| C | 0.625825000   | 1.303827000  | 4.136995000  |
| O | 1.729881000   | 1.568046000  | 3.636383000  |
| N | -0.268495000  | 2.274755000  | 4.420457000  |
| H | 1.584077000   | -5.188167000 | -4.190469000 |
| H | 2.226198000   | -4.116830000 | -5.448275000 |
| H | 0.485979000   | -4.306345000 | -5.268669000 |
| H | -0.165830000  | -1.878680000 | -4.597175000 |
| H | 1.408115000   | -1.584096000 | -5.347812000 |
| H | 1.046122000   | -0.908522000 | -3.744646000 |
| H | 3.341274000   | -3.859419000 | -3.104449000 |
| H | 4.866091000   | -2.110577000 | -3.865292000 |
| H | 3.524703000   | -1.013564000 | -4.243847000 |
| H | 3.779344000   | -2.484791000 | -5.198231000 |
| H | 5.485965000   | -0.464461000 | 1.170353000  |
| H | 3.582285000   | 0.429174000  | 4.094602000  |
| H | 4.895194000   | 0.069275000  | 2.986026000  |
| H | 4.582989000   | -1.014276000 | 4.337144000  |
| H | 5.999114000   | -2.179427000 | 2.848459000  |
| H | 7.065482000   | -2.325443000 | 1.450133000  |
| H | 5.733529000   | -3.477425000 | 1.683700000  |
| H | 4.027507000   | 0.229253000  | -0.719693000 |
| H | 4.542386000   | -0.424406000 | -2.264735000 |
| H | 6.435999000   | 0.300900000  | -3.187225000 |
| H | 7.592096000   | 1.285161000  | -2.340795000 |
| H | 6.455191000   | -3.355093000 | -0.684924000 |
| H | 7.153252000   | -1.764065000 | -0.983914000 |
| H | 6.150607000   | -2.536518000 | -2.220133000 |
| H | 2.992833000   | -4.579520000 | -0.603373000 |
| H | 4.461010000   | -4.306694000 | 0.339023000  |
| H | 4.564535000   | -4.422532000 | -1.427126000 |
| H | -2.432261000  | -4.267936000 | -3.152570000 |

|   |              |              |              |
|---|--------------|--------------|--------------|
| H | -1.126677000 | -5.308409000 | -3.754330000 |
| H | -1.211111000 | -3.609729000 | -4.214477000 |
| H | -3.178620000 | -4.261371000 | -1.006017000 |
| H | -3.303375000 | -6.783287000 | -0.820325000 |
| H | -1.542456000 | -6.857112000 | -1.022358000 |
| H | -2.567165000 | -6.230985000 | -2.316672000 |
| H | -1.971326000 | -6.085545000 | 2.668319000  |
| H | -0.971914000 | -6.474450000 | 1.262623000  |
| H | -2.670243000 | -7.001399000 | 1.323679000  |
| H | -4.183125000 | -3.576876000 | 0.966269000  |
| H | -3.867644000 | -4.402886000 | 2.511348000  |
| H | -4.529741000 | -5.303546000 | 1.140341000  |
| H | -1.831506000 | -3.770337000 | 3.361146000  |
| H | -0.594148000 | -2.356877000 | 5.133581000  |
| H | 0.365265000  | -4.669487000 | 4.935656000  |
| H | 1.270034000  | -3.697912000 | 6.110983000  |
| H | 1.935606000  | -3.983209000 | 4.485977000  |
| H | 1.472415000  | -1.266265000 | 6.596281000  |
| H | 2.535485000  | -0.128257000 | 5.764387000  |
| H | 2.886103000  | -1.864746000 | 5.715265000  |
| H | -0.365729000 | -0.106493000 | 5.397304000  |
| H | -0.604150000 | -0.338331000 | 3.677878000  |
| H | -0.139443000 | 3.203570000  | 3.991556000  |
| H | -1.188618000 | 2.026146000  | 4.756408000  |
| H | 2.596754000  | -1.152305000 | -1.915035000 |

## 2C. NpRdhA/DCMP, Co<sup>I</sup> → Co<sup>III</sup> Transition State (Charge = 1, Multiplicity = 1)

|    |              |              |              |
|----|--------------|--------------|--------------|
| C  | 3.489726000  | 7.396796000  | -2.945973000 |
| C  | 6.626146000  | 4.564186000  | 0.845344000  |
| C  | -6.692857000 | -0.585823000 | 3.643859000  |
| C  | -9.999033000 | 3.888545000  | 0.336225000  |
| C  | 0.390946000  | 6.048147000  | 2.171985000  |
| C  | -5.084931000 | -2.167849000 | -4.887295000 |
| Co | 1.302934000  | -2.514615000 | 0.488897000  |
| C  | -1.008507000 | 2.584828000  | -0.224530000 |
| C  | -0.506931000 | 1.697444000  | -1.215868000 |
| C  | -1.240590000 | 1.444169000  | -2.381411000 |
| C  | -2.401099000 | 2.151289000  | -2.703469000 |
| C  | -2.823338000 | 3.140189000  | -1.799149000 |
| C  | -2.140896000 | 3.350574000  | -0.607952000 |
| O  | -0.449404000 | 2.712821000  | 0.969055000  |
| Cl | 0.375504000  | -0.441376000 | -0.134072000 |
| Cl | -2.690035000 | 4.653633000  | 0.455031000  |
| C  | -3.164728000 | 1.908793000  | -3.983634000 |
| H  | -2.537198000 | 1.403528000  | -4.724229000 |
| H  | -4.044719000 | 1.276236000  | -3.805448000 |
| H  | -3.518453000 | 2.847205000  | -4.422732000 |
| H  | -0.838571000 | 0.737971000  | -3.106182000 |
| H  | -3.686183000 | 3.758134000  | -2.029690000 |
| C  | -4.555154000 | -2.158033000 | -3.470101000 |
| C  | -3.295858000 | -1.594727000 | -3.175874000 |
| C  | -2.758398000 | -1.645372000 | -1.882759000 |
| C  | -3.489120000 | -2.258142000 | -0.852745000 |
| C  | -4.759255000 | -2.795823000 | -1.116513000 |
| C  | -5.285479000 | -2.743911000 | -2.415569000 |
| H  | -6.173082000 | -2.342426000 | -4.914315000 |
| H  | -4.603193000 | -2.972495000 | -5.474305000 |
| H  | -4.871875000 | -1.215420000 | -5.403282000 |
| H  | -2.721808000 | -1.118503000 | -3.977766000 |
| H  | -1.768036000 | -1.228970000 | -1.672693000 |
| H  | -3.046191000 | -2.354254000 | 0.144620000  |
| H  | -5.334975000 | -3.271304000 | -0.314307000 |
| H  | -6.272272000 | -3.175220000 | -2.619178000 |
| C  | 3.081353000  | 5.959598000  | -2.681948000 |
| C  | 4.027358000  | 4.925122000  | -2.644238000 |
| C  | 3.660078000  | 3.601424000  | -2.410771000 |
| C  | 2.315718000  | 3.244719000  | -2.196187000 |
| C  | 1.353228000  | 4.270620000  | -2.266709000 |
| C  | 1.742127000  | 5.592849000  | -2.495558000 |
| O  | 2.022809000  | 1.951205000  | -1.891130000 |
| H  | 0.844711000  | 1.782233000  | -1.528858000 |
| H  | 3.599055000  | 7.587379000  | -4.021388000 |
| H  | 4.449831000  | 7.628919000  | -2.472650000 |
| H  | 2.741351000  | 8.096796000  | -2.561320000 |
| H  | 5.081350000  | 5.158577000  | -2.787166000 |
| H  | 4.418633000  | 2.826539000  | -2.374461000 |
| H  | 0.302607000  | 4.039023000  | -2.128756000 |
| H  | 0.971254000  | 6.361054000  | -2.527697000 |
| C  | 5.108985000  | 4.706077000  | 1.017097000  |
| C  | 4.389679000  | 3.349766000  | 1.018569000  |
| C  | 2.874443000  | 3.492324000  | 1.107273000  |
| N  | 2.185917000  | 2.183683000  | 0.876245000  |
| H  | 2.459032000  | 1.485276000  | 1.583258000  |
| H  | 1.123713000  | 2.298013000  | 0.956059000  |
| H  | 2.349126000  | 1.839025000  | -0.099616000 |
| H  | 6.869438000  | 4.052808000  | -0.102694000 |
| H  | 7.066690000  | 3.963014000  | 1.661150000  |
| H  | 7.122030000  | 5.550561000  | 0.844676000  |
| H  | 4.697826000  | 5.321443000  | 0.193684000  |
| H  | 4.881381000  | 5.246651000  | 1.956568000  |
| H  | 4.650140000  | 2.810089000  | 0.091028000  |
| H  | 4.756339000  | 2.728941000  | 1.857906000  |
| H  | 2.499935000  | 4.176826000  | 0.329532000  |
| H  | 2.543505000  | 3.853542000  | 2.091669000  |

|   |               |              |              |
|---|---------------|--------------|--------------|
| C | -5.831796000  | -1.055875000 | 2.460318000  |
| C | -5.540354000  | 0.044535000  | 1.424289000  |
| N | -4.658352000  | 1.115101000  | 1.916957000  |
| C | -3.310679000  | 1.138993000  | 1.852454000  |
| N | -2.641567000  | 0.148282000  | 1.235225000  |
| N | -2.609541000  | 2.112389000  | 2.467822000  |
| H | -5.109794000  | 1.944606000  | 2.296367000  |
| H | -1.634296000  | 0.246871000  | 1.043024000  |
| H | -3.135199000  | -0.434689000 | 0.559376000  |
| H | -3.138321000  | 2.924050000  | 2.785464000  |
| H | -1.684369000  | 2.374013000  | 2.010888000  |
| H | -6.880745000  | -1.411571000 | 4.350356000  |
| H | -7.670022000  | -0.206234000 | 3.295305000  |
| H | -6.193117000  | 0.225203000  | 4.204606000  |
| H | -6.348984000  | -1.873818000 | 1.924505000  |
| H | -4.872614000  | -1.475890000 | 2.819225000  |
| H | -5.099733000  | -0.386608000 | 0.508613000  |
| H | -6.471949000  | 0.535587000  | 1.099774000  |
| C | -8.706532000  | 3.248049000  | -0.128162000 |
| C | -8.718101000  | 2.084022000  | -0.925720000 |
| C | -7.526920000  | 1.527101000  | -1.415893000 |
| C | -6.292149000  | 2.122503000  | -1.113829000 |
| C | -6.260964000  | 3.270377000  | -0.305961000 |
| C | -7.456288000  | 3.822991000  | 0.181090000  |
| H | -10.401239000 | 4.556843000  | -0.448436000 |
| H | -9.846884000  | 4.497870000  | 1.242917000  |
| H | -10.772887000 | 3.131483000  | 0.549808000  |
| H | -9.677129000  | 1.615004000  | -1.175872000 |
| H | -7.562388000  | 0.625982000  | -2.038769000 |
| H | -5.359936000  | 1.693216000  | -1.496841000 |
| H | -5.303979000  | 3.745644000  | -0.063801000 |
| H | -7.420360000  | 4.728535000  | 0.798714000  |
| O | 0.055132000   | 4.749400000  | 2.641473000  |
| H | 1.290220000   | 6.040760000  | 1.523249000  |
| H | 0.605287000   | 6.677952000  | 3.051320000  |
| H | -0.442825000  | 6.507118000  | 1.604764000  |
| H | -0.192244000  | 4.158384000  | 1.879521000  |
| C | 1.240537000   | -4.252022000 | -4.651856000 |
| C | 1.317842000   | -3.089556000 | -3.650307000 |
| C | 0.613087000   | -1.830487000 | -4.206045000 |
| C | 2.818078000   | -2.799828000 | -3.302243000 |
| C | 3.565959000   | -1.967394000 | -4.343205000 |
| C | 2.719841000   | -2.180540000 | -1.905845000 |
| C | 3.807576000   | -2.399402000 | -0.831198000 |
| C | 5.084522000   | -1.488362000 | -0.813463000 |
| C | 5.265834000   | -1.207420000 | 0.722961000  |
| C | 3.856571000   | -1.362117000 | 1.257013000  |
| C | 3.409199000   | -0.885118000 | 2.539887000  |
| C | 4.379435000   | -0.029156000 | 3.329542000  |
| C | 6.285980000   | -2.079869000 | 1.478573000  |
| C | 4.789566000   | -0.129737000 | -1.511740000 |
| C | 6.012237000   | 0.781606000  | -1.558805000 |
| N | 6.442496000   | 1.112414000  | -2.810790000 |
| O | 6.594051000   | 1.183344000  | -0.551858000 |
| C | 6.312499000   | -2.132826000 | -1.469395000 |
| C | 4.138499000   | -3.899367000 | -0.710627000 |
| N | 3.076522000   | -1.982060000 | 0.406527000  |
| N | 1.519084000   | -2.827588000 | -1.327643000 |
| C | 0.748823000   | -3.355110000 | -2.247636000 |
| C | -0.457585000  | -4.053573000 | -1.914096000 |
| C | -1.374638000  | -4.541467000 | -3.016033000 |
| C | -0.812736000  | -4.270639000 | -0.597173000 |
| N | -0.245785000  | -3.637820000 | 0.503620000  |
| C | -1.921190000  | -5.219116000 | -0.160292000 |
| C | -1.781032000  | -6.652657000 | -0.701524000 |
| C | -1.915120000  | -5.111897000 | 1.398619000  |
| C | -1.390230000  | -6.380326000 | 2.113839000  |
| C | -3.313297000  | -4.780864000 | 1.953448000  |
| C | -0.905698000  | -4.003003000 | 1.631434000  |
| C | -0.636309000  | -3.493753000 | 2.891531000  |
| C | 0.393966000   | -2.624210000 | 3.216764000  |
| N | 1.304517000   | -2.128834000 | 2.351342000  |
| C | 0.724003000   | -2.225781000 | 4.628311000  |
| C | 1.541263000   | -3.345116000 | 5.304371000  |
| C | 1.514089000   | -0.905107000 | 4.385829000  |
| C | 2.172643000   | -1.255655000 | 3.030384000  |
| C | 2.401005000   | -0.550849000 | 5.585489000  |
| C | 0.420193000   | 0.188320000  | 4.180193000  |
| C | 0.903389000   | 1.624713000  | 4.031779000  |
| O | 2.031197000   | 1.902994000  | 3.608927000  |
| N | 0.012821000   | 2.580840000  | 4.380213000  |
| H | 1.513617000   | -5.201044000 | -4.178799000 |
| H | 1.945924000   | -4.068025000 | -5.470005000 |
| H | 0.250926000   | -4.358441000 | -5.099901000 |
| H | -0.462763000  | -2.004935000 | -4.295212000 |
| H | 0.996244000   | -1.581715000 | -5.200877000 |
| H | 0.761927000   | -0.970009000 | -3.545544000 |
| H | 3.302974000   | -3.780885000 | -3.216870000 |
| H | 4.637928000   | -1.940915000 | -4.125130000 |
| H | 3.195740000   | -0.937230000 | -4.373522000 |
| H | 3.452699000   | -2.397626000 | -5.343946000 |
| H | 5.599882000   | -0.171372000 | 0.828881000  |
| H | 3.861562000   | 0.797753000  | 3.809167000  |
| H | 5.141592000   | 0.395349000  | 2.673847000  |
| H | 4.899216000   | -0.612591000 | 4.097841000  |

|   |              |              |              |
|---|--------------|--------------|--------------|
| H | 6.311324000  | -1.795530000 | 2.533893000  |
| H | 7.288317000  | -1.924799000 | 1.070578000  |
| H | 6.048790000  | -3.146150000 | 1.427626000  |
| H | 3.992326000  | 0.404419000  | -0.983952000 |
| H | 4.425662000  | -0.301161000 | -2.526193000 |
| H | 5.911629000  | 0.881571000  | -3.637987000 |
| H | 7.207492000  | 1.769615000  | -2.898104000 |
| H | 6.583139000  | -3.080110000 | -0.999596000 |
| H | 7.176145000  | -1.465660000 | -1.391507000 |
| H | 6.133095000  | -2.322158000 | -2.533157000 |
| H | 3.211829000  | -4.471632000 | -0.611485000 |
| H | 4.751710000  | -4.091797000 | 0.171352000  |
| H | 4.678903000  | -4.257797000 | -1.590620000 |
| H | -2.397028000 | -4.650086000 | -2.646765000 |
| H | -1.060847000 | -5.495130000 | -3.454414000 |
| H | -1.417350000 | -3.806762000 | -3.822832000 |
| H | -2.873750000 | -4.816159000 | -0.528995000 |
| H | -2.559849000 | -7.292535000 | -0.274901000 |
| H | -0.807070000 | -7.081770000 | -0.452149000 |
| H | -1.893750000 | -6.683531000 | -1.785481000 |
| H | -1.338436000 | -6.196675000 | 3.191410000  |
| H | -0.387157000 | -6.651296000 | 1.772419000  |
| H | -2.058576000 | -7.230760000 | 1.949345000  |
| H | -3.690872000 | -3.835344000 | 1.555253000  |
| H | -3.299816000 | -4.708329000 | 3.046030000  |
| H | -4.017743000 | -5.574552000 | 1.680438000  |
| H | -1.245787000 | -3.852717000 | 3.715132000  |
| H | -0.180283000 | -2.038974000 | 5.218537000  |
| H | 0.962924000  | -4.274065000 | 5.314027000  |
| H | 1.787174000  | -3.084756000 | 6.337497000  |
| H | 2.472653000  | -3.529955000 | 4.758376000  |
| H | 1.792869000  | -0.609820000 | 6.496263000  |
| H | 2.797499000  | 0.461239000  | 5.516443000  |
| H | 3.236095000  | -1.246035000 | 5.695454000  |
| H | -0.278283000 | 0.132438000  | 5.024901000  |
| H | -0.159630000 | -0.045248000 | 3.276557000  |
| H | 0.156971000  | 3.528143000  | 3.999369000  |
| H | -0.942611000 | 2.307643000  | 4.569106000  |
| H | 2.499922000  | -1.107031000 | -1.967194000 |

## 2D. NpRdhA/DCMP, Co<sup>III</sup> (Charge = 1, Multiplicity = 1)

|    |               |              |              |
|----|---------------|--------------|--------------|
| C  | 2.702132000   | 7.845233000  | -2.101449000 |
| C  | 6.212818000   | 4.923418000  | 1.270919000  |
| C  | -6.456406000  | -1.803485000 | 3.718372000  |
| C  | -10.278293000 | 2.668945000  | 1.020584000  |
| C  | -0.091000000  | 5.623031000  | 2.886035000  |
| C  | -4.972181000  | -2.237659000 | -4.969415000 |
| Co | 1.584936000   | -2.560582000 | 0.200498000  |
| C  | -1.694211000  | 2.812446000  | -0.182785000 |
| C  | -1.423505000  | 1.999925000  | -1.305919000 |
| C  | -2.110635000  | 2.146077000  | -2.505509000 |
| C  | -3.121606000  | 3.101975000  | -2.664588000 |
| C  | -3.394877000  | 3.934689000  | -1.573947000 |
| C  | -2.700313000  | 3.789859000  | -0.376473000 |
| O  | -1.051350000  | 2.643095000  | 0.971499000  |
| Cl | 0.387494000   | -0.633160000 | 0.326356000  |
| Cl | -3.068000000  | 4.900282000  | 0.943886000  |
| C  | -3.909640000  | 3.221602000  | -3.947255000 |
| H  | -3.371201000  | 2.763150000  | -4.782788000 |
| H  | -4.883301000  | 2.720329000  | -3.862118000 |
| H  | -4.104687000  | 4.268179000  | -4.203304000 |
| H  | -1.845418000  | 1.506422000  | -3.344561000 |
| H  | -4.156654000  | 4.705638000  | -1.650115000 |
| C  | -4.428696000  | -2.239330000 | -3.555920000 |
| C  | -3.333097000  | -1.426799000 | -3.195370000 |
| C  | -2.747799000  | -1.512218000 | -1.923495000 |
| C  | -3.275719000  | -2.399545000 | -0.972235000 |
| C  | -4.405759000  | -3.171049000 | -1.291912000 |
| C  | -4.969973000  | -3.094708000 | -2.573500000 |
| H  | -6.016008000  | -2.590818000 | -5.004837000 |
| H  | -4.371313000  | -2.910376000 | -5.610547000 |
| H  | -4.928006000  | -1.230921000 | -5.419034000 |
| H  | -2.916756000  | -0.730948000 | -3.932464000 |
| H  | -1.871283000  | -0.905604000 | -1.675805000 |
| H  | -2.778927000  | -2.522386000 | -0.001447000 |
| H  | -4.838938000  | -3.851475000 | -0.550607000 |
| H  | -5.836560000  | -3.718366000 | -2.821066000 |
| C  | 2.600561000   | 6.342514000  | -2.160784000 |
| C  | 3.738895000   | 5.547718000  | -2.403208000 |
| C  | 3.678464000   | 4.165185000  | -2.379245000 |
| C  | 2.464373000   | 3.473961000  | -2.067867000 |
| C  | 1.299574000   | 4.292391000  | -1.912079000 |
| C  | 1.380483000   | 5.676429000  | -1.944387000 |
| O  | 2.439097000   | 2.189688000  | -1.857129000 |
| H  | -0.628896000  | 1.265097000  | -1.210297000 |
| H  | 3.318569000   | 8.239385000  | -2.917614000 |
| H  | 3.169711000   | 8.170263000  | -1.161412000 |
| H  | 1.715447000   | 8.314588000  | -2.159545000 |
| H  | 4.692300000   | 6.037074000  | -2.597140000 |
| H  | 4.574794000   | 3.572264000  | -2.533578000 |
| H  | 0.348377000   | 3.798425000  | -1.738323000 |
| H  | 0.477077000   | 6.264028000  | -1.787872000 |
| C  | 4.683826000   | 4.897887000  | 1.471008000  |
| C  | 4.007914000   | 3.555192000  | 1.121367000  |

|   |               |              |              |
|---|---------------|--------------|--------------|
| C | 2.484406000   | 3.639449000  | 1.266469000  |
| N | 1.774116000   | 2.401661000  | 0.799211000  |
| H | 1.990518000   | 1.602497000  | 1.421783000  |
| H | 0.723036000   | 2.508481000  | 0.854188000  |
| H | 2.006669000   | 2.169377000  | -0.217448000 |
| H | 6.469660000   | 4.733953000  | 0.212840000  |
| H | 6.711883000   | 4.146468000  | 1.874893000  |
| H | 6.626228000   | 5.907103000  | 1.552456000  |
| H | 4.224939000   | 5.688947000  | 0.845747000  |
| H | 4.445795000   | 5.158092000  | 2.521110000  |
| H | 4.252172000   | 3.291055000  | 0.077862000  |
| H | 4.407475000   | 2.747672000  | 1.762916000  |
| H | 2.091122000   | 4.468285000  | 0.656652000  |
| H | 2.179887000   | 3.797922000  | 2.311751000  |
| C | -5.546602000  | -1.918113000 | 2.483668000  |
| C | -5.581208000  | -0.693981000 | 1.548897000  |
| N | -4.954672000  | 0.518702000  | 2.104245000  |
| C | -3.652043000  | 0.855894000  | 1.985455000  |
| N | -2.774430000  | 0.015122000  | 1.404589000  |
| N | -3.174401000  | 1.996530000  | 2.511556000  |
| H | -5.585434000  | 1.265028000  | 2.391751000  |
| H | -1.828269000  | 0.363045000  | 1.204064000  |
| H | -3.112369000  | -0.716061000 | 0.781326000  |
| H | -3.838280000  | 2.706931000  | 2.813990000  |
| H | -2.281722000  | 2.362280000  | 2.061350000  |
| H | -6.389621000  | -2.709212000 | 4.344149000  |
| H | -7.511986000  | -1.671779000 | 3.420173000  |
| H | -6.169990000  | -0.939505000 | 4.345234000  |
| H | -5.852525000  | -2.791045000 | 1.876389000  |
| H | -4.499587000  | -2.106569000 | 2.790231000  |
| H | -5.104391000  | -0.931811000 | 0.580600000  |
| H | -6.619997000  | -0.417113000 | 1.307423000  |
| C | -8.877829000  | 2.396927000  | 0.505551000  |
| C | -8.629072000  | 1.350292000  | -0.407549000 |
| C | -7.349190000  | 1.143456000  | -0.947254000 |
| C | -6.283008000  | 1.979737000  | -0.581520000 |
| C | -6.509495000  | 3.017091000  | 0.338467000  |
| C | -7.790747000  | 3.216783000  | 0.878479000  |
| H | -10.819821000 | 3.337283000  | 0.324844000  |
| H | -10.259164000 | 3.164380000  | 2.005950000  |
| H | -10.866141000 | 1.739389000  | 1.107752000  |
| H | -9.455648000  | 0.697084000  | -0.711918000 |
| H | -7.184062000  | 0.327608000  | -1.660553000 |
| H | -5.285599000  | 1.836575000  | -1.011463000 |
| H | -5.686055000  | 3.683624000  | 0.620261000  |
| H | -7.957642000  | 4.040118000  | 1.583557000  |
| O | -0.246762000  | 4.211381000  | 2.943497000  |
| H | 0.540401000   | 5.937227000  | 2.030461000  |
| H | 0.404919000   | 5.943479000  | 3.817579000  |
| H | -1.064510000  | 6.145507000  | 2.807187000  |
| H | -0.645744000  | 3.855173000  | 2.098876000  |
| C | 1.619445000   | -2.646003000 | -5.220740000 |
| C | 1.603083000   | -1.858357000 | -3.901237000 |
| C | 0.764888000   | -0.563736000 | -4.039791000 |
| C | 3.079039000   | -1.543401000 | -3.469356000 |
| C | 3.704986000   | -0.332081000 | -4.162453000 |
| C | 2.967904000   | -1.422769000 | -1.946522000 |
| C | 4.079558000   | -1.930429000 | -0.990849000 |
| C | 5.323324000   | -1.030421000 | -0.663093000 |
| C | 5.479569000   | -1.234082000 | 0.887166000  |
| C | 4.061622000   | -1.538889000 | 1.313341000  |
| C | 3.529478000   | -1.360751000 | 2.636733000  |
| C | 4.376225000   | -0.584309000 | 3.621171000  |
| C | 6.472938000   | -2.301470000 | 1.383340000  |
| C | 4.983757000   | 0.470525000  | -0.885518000 |
| C | 6.172333000   | 1.377673000  | -0.585786000 |
| N | 6.698909000   | 2.023101000  | -1.664799000 |
| O | 6.652717000   | 1.510515000  | 0.540068000  |
| C | 6.578270000   | -1.393648000 | -1.465515000 |
| C | 4.468857000   | -3.377100000 | -1.348194000 |
| N | 3.329292000   | -1.941031000 | 0.304256000  |
| N | 1.822539000   | -2.302243000 | -1.616227000 |
| C | 1.092295000   | -2.604577000 | -2.657956000 |
| C | -0.023299000  | -3.506952000 | -2.556642000 |
| C | -0.888339000  | -3.757786000 | -3.771243000 |
| C | -0.329982000  | -4.144116000 | -1.368143000 |
| N | 0.185611000   | -3.803055000 | -0.125042000 |
| C | -1.336870000  | -5.278380000 | -1.224672000 |
| C | -1.126573000  | -6.469749000 | -2.173249000 |
| C | -1.267891000  | -5.648363000 | 0.293764000  |
| C | -0.497508000  | -6.962060000 | 0.577287000  |
| C | -2.667019000  | -5.742626000 | 0.924364000  |
| C | -0.428468000  | -4.516317000 | 0.851698000  |
| C | -0.267889000  | -4.280620000 | 2.210263000  |
| C | 0.630925000   | -3.385127000 | 2.780791000  |
| N | 1.560814000   | -2.699417000 | 2.091589000  |
| C | 0.764371000   | -3.124850000 | 4.259850000  |
| C | 1.592285000   | -4.239056000 | 4.929038000  |
| C | 1.458435000   | -1.724817000 | 4.243772000  |
| C | 2.288466000   | -1.870041000 | 2.955826000  |
| C | 2.159370000   | -1.407824000 | 5.567910000  |
| C | 0.315278000   | -0.691809000 | 3.988488000  |
| C | 0.736257000   | 0.764286000  | 3.805295000  |
| O | 1.831926000   | 1.079989000  | 3.321945000  |
| N | -0.178163000  | 1.685140000  | 4.176562000  |



|   |              |              |              |
|---|--------------|--------------|--------------|
| H | 2.000331000  | -3.662331000 | -5.074074000 |
| H | 2.283534000  | -2.136972000 | -5.928005000 |
| H | 0.636169000  | -2.706170000 | -5.691093000 |
| H | -0.294041000 | -0.808887000 | -4.170301000 |
| H | 1.088847000  | 0.003607000  | -4.918065000 |
| H | 0.865532000  | 0.080565000  | -3.160543000 |
| H | 3.662536000  | -2.441621000 | -3.709447000 |
| H | 4.784137000  | -0.299951000 | -3.977962000 |
| H | 3.265302000  | 0.603190000  | -3.799184000 |
| H | 3.569625000  | -0.387066000 | -5.248163000 |
| H | 5.812444000  | -0.280802000 | 1.305869000  |
| H | 3.768807000  | 0.140332000  | 4.157797000  |
| H | 5.157575000  | -0.026162000 | 3.103541000  |
| H | 4.866586000  | -1.245807000 | 4.344698000  |
| H | 6.472511000  | -2.321047000 | 2.477654000  |
| H | 7.486696000  | -2.053974000 | 1.056594000  |
| H | 6.227821000  | -3.307991000 | 1.032959000  |
| H | 4.168699000  | 0.770086000  | -0.220700000 |
| H | 4.625260000  | 0.645791000  | -1.899881000 |
| H | 6.279940000  | 1.963851000  | -2.581008000 |
| H | 7.465070000  | 2.667773000  | -1.519333000 |
| H | 6.880223000  | -2.432457000 | -1.317724000 |
| H | 7.416784000  | -0.759252000 | -1.162398000 |
| H | 6.414063000  | -1.236968000 | -2.537474000 |
| H | 3.568181000  | -3.990983000 | -1.437364000 |
| H | 5.100930000  | -3.812817000 | -0.573039000 |
| H | 5.012641000  | -3.415343000 | -2.295512000 |
| H | -1.886457000 | -4.085978000 | -3.474304000 |
| H | -0.465150000 | -4.503273000 | -4.453756000 |
| H | -1.019473000 | -2.832397000 | -4.334955000 |
| H | -2.332418000 | -4.860888000 | -1.424314000 |
| H | -1.817237000 | -7.278215000 | -1.912840000 |
| H | -0.105720000 | -6.856806000 | -2.114505000 |
| H | -1.324106000 | -6.198647000 | -3.210569000 |
| H | -0.403862000 | -7.101151000 | 1.658916000  |
| H | 0.510216000  | -6.937275000 | 0.152136000  |
| H | -1.029109000 | -7.826594000 | 0.168672000  |
| H | -3.190003000 | -4.783957000 | 0.872782000  |
| H | -2.611551000 | -6.048083000 | 1.974554000  |
| H | -3.264607000 | -6.491765000 | 0.393181000  |
| H | -0.878606000 | -4.864099000 | 2.892209000  |
| H | -0.218479000 | -3.067673000 | 4.741876000  |
| H | 1.107409000  | -5.208372000 | 4.777063000  |
| H | 1.683941000  | -4.069408000 | 6.005496000  |
| H | 2.596943000  | -4.289434000 | 4.495686000  |
| H | 1.458090000  | -1.596154000 | 6.389544000  |
| H | 2.458889000  | -0.360459000 | 5.624411000  |
| H | 3.041464000  | -2.030976000 | 5.729184000  |
| H | -0.398625000 | -0.771239000 | 4.818502000  |
| H | -0.219476000 | -0.966191000 | 3.068496000  |
| H | -0.062457000 | 2.669978000  | 3.892802000  |
| H | -1.104751000 | 1.394674000  | 4.457513000  |
| H | 2.689484000  | -0.401042000 | -1.657725000 |

### 3A. PccA/TCE, Co<sup>II</sup> (Charge = 2, Multiplicity = 2)

|    |              |              |              |
|----|--------------|--------------|--------------|
| Co | 0.647996000  | -2.232535000 | -1.444288000 |
| C  | -1.664623000 | -3.757968000 | -0.866276000 |
| C  | -3.232620000 | -3.616792000 | -0.965339000 |
| C  | -3.398072000 | -2.817196000 | -2.312142000 |
| C  | -2.077026000 | -2.089043000 | -2.447117000 |
| C  | -1.832690000 | -0.984029000 | -3.336258000 |
| C  | -0.544896000 | -0.542459000 | -3.562014000 |
| C  | -0.055128000 | 0.584554000  | -4.493454000 |
| C  | 1.305249000  | -0.035374000 | -4.942366000 |
| C  | 1.699435000  | -0.753178000 | -3.679468000 |
| C  | 3.007097000  | -0.999085000 | -3.298140000 |
| C  | 3.404059000  | -1.664190000 | -2.144387000 |
| C  | 4.845586000  | -1.754106000 | -1.686493000 |
| C  | 4.748799000  | -2.855350000 | -0.593166000 |
| C  | 3.267681000  | -2.880017000 | -0.258246000 |
| C  | 2.735052000  | -3.518641000 | 0.845858000  |
| C  | 1.319501000  | -3.701735000 | 0.995930000  |
| C  | 0.593899000  | -4.401446000 | 2.157446000  |
| C  | -0.798562000 | -4.692998000 | 1.500111000  |
| C  | -0.948531000 | -3.552687000 | 0.492038000  |
| C  | -1.135054000 | -5.031940000 | -1.551339000 |
| N  | -1.167085000 | -2.581076000 | -1.644080000 |
| N  | 0.595789000  | -1.123776000 | -2.984268000 |
| N  | 2.547567000  | -2.244178000 | -1.266374000 |
| N  | 0.457177000  | -3.228420000 | 0.123584000  |
| C  | -3.961219000 | -4.968275000 | -0.944367000 |
| C  | -3.764946000 | -2.729286000 | 0.181156000  |
| C  | -5.244420000 | -2.349416000 | 0.088122000  |
| O  | -5.995236000 | -2.659447000 | -0.825290000 |
| N  | -5.692473000 | -1.532047000 | 1.119555000  |
| C  | -3.748047000 | -3.643314000 | -3.564661000 |
| C  | -3.038942000 | -0.381746000 | -4.030707000 |
| C  | -0.915757000 | 1.009157000  | -5.688683000 |
| C  | 0.358766000  | 1.834609000  | -3.656493000 |
| C  | -0.673398000 | 2.491719000  | -2.756123000 |
| O  | -1.900170000 | 2.300448000  | -2.865258000 |
| N  | -0.163054000 | 3.316915000  | -1.826115000 |
| C  | 5.214773000  | -0.402838000 | -1.027136000 |
| C  | 5.835183000  | -2.044887000 | -2.824701000 |

|    |              |              |              |
|----|--------------|--------------|--------------|
| C  | 5.193007000  | -4.261481000 | -1.047885000 |
| C  | 3.676383000  | -4.046409000 | 1.908854000  |
| C  | 0.478278000  | -3.397391000 | 3.329005000  |
| C  | 1.202532000  | -5.729154000 | 2.640514000  |
| C  | -1.956016000 | -4.854377000 | 2.484451000  |
| C  | 1.199732000  | -1.031897000 | -6.112398000 |
| H  | -4.204503000 | -2.091642000 | -2.188244000 |
| H  | 2.025018000  | 0.749672000  | -5.200911000 |
| H  | 3.787709000  | -0.616535000 | -3.946245000 |
| H  | 5.342497000  | -2.561524000 | 0.278417000  |
| H  | -0.675813000 | -5.629554000 | 0.942618000  |
| H  | -1.367480000 | -2.662986000 | 0.979415000  |
| H  | -0.040578000 | -5.030064000 | -1.537803000 |
| H  | -1.459643000 | -5.074836000 | -2.592099000 |
| H  | -1.484796000 | -5.934166000 | -1.044985000 |
| H  | -3.646953000 | -5.619179000 | -1.761641000 |
| H  | -5.037992000 | -4.814998000 | -1.032478000 |
| H  | -3.767151000 | -5.495269000 | -0.003947000 |
| H  | -3.191728000 | -1.797677000 | 0.243872000  |
| H  | -3.621197000 | -3.226790000 | 1.146976000  |
| H  | -6.701264000 | -1.523069000 | 1.241656000  |
| H  | -5.159994000 | -1.465179000 | 1.983046000  |
| H  | -3.827858000 | -2.990890000 | -4.437963000 |
| H  | -4.713886000 | -4.134095000 | -3.423280000 |
| H  | -2.995493000 | -4.404675000 | -3.785174000 |
| H  | -3.165312000 | -0.774204000 | -5.045355000 |
| H  | -2.955081000 | 0.700284000  | -4.089773000 |
| H  | -3.952758000 | -0.611066000 | -3.479272000 |
| H  | -0.283874000 | 1.568860000  | -6.388069000 |
| H  | -1.733525000 | 1.663568000  | -5.387402000 |
| H  | -1.327594000 | 0.152044000  | -6.224726000 |
| H  | 0.696648000  | 2.604545000  | -4.364011000 |
| H  | 1.230095000  | 1.587794000  | -3.038161000 |
| H  | -0.771499000 | 3.900949000  | -1.256872000 |
| H  | 0.836756000  | 3.456153000  | -1.721723000 |
| H  | 2.167026000  | -1.515062000 | -6.276536000 |
| H  | 0.912815000  | -0.522956000 | -7.036444000 |
| H  | 0.460965000  | -1.811437000 | -5.897677000 |
| H  | 5.128901000  | 0.420617000  | -1.741539000 |
| H  | 6.246617000  | -0.445510000 | -0.665748000 |
| H  | 4.563836000  | -0.183271000 | -0.176306000 |
| H  | 5.879828000  | -1.197934000 | -3.516701000 |
| H  | 5.566497000  | -2.937884000 | -3.394972000 |
| H  | 6.842134000  | -2.181516000 | -2.418614000 |
| H  | 6.254842000  | -4.268837000 | -1.307413000 |
| H  | 4.618904000  | -4.592429000 | -1.919330000 |
| H  | 5.037218000  | -4.987542000 | -0.246483000 |
| H  | 4.650305000  | -3.561198000 | 1.847186000  |
| H  | 3.829855000  | -5.128094000 | 1.832061000  |
| H  | 3.290921000  | -3.838774000 | 2.909455000  |
| H  | 1.468995000  | -3.077069000 | 3.663167000  |
| H  | -0.028762000 | -3.865285000 | 4.178573000  |
| H  | -0.082301000 | -2.502059000 | 3.038729000  |
| H  | 1.515715000  | -6.353576000 | 1.797707000  |
| H  | 0.441572000  | -6.282168000 | 3.201962000  |
| H  | 2.054131000  | -5.589105000 | 3.307468000  |
| H  | -1.712742000 | -5.587159000 | 3.260265000  |
| H  | -2.855460000 | -5.214674000 | 1.976601000  |
| H  | -2.197758000 | -3.907304000 | 2.979155000  |
| C  | 0.680485000  | 0.862167000  | 3.495269000  |
| C  | 0.898321000  | 0.640037000  | 2.192860000  |
| CI | 2.060824000  | -0.505127000 | 1.661447000  |
| CI | 0.031851000  | 1.458121000  | 0.927656000  |
| CI | -0.495086000 | 1.956985000  | 4.098452000  |
| H  | 1.253714000  | 0.331767000  | 4.246788000  |
| C  | 5.552285000  | -3.051710000 | 5.267355000  |
| C  | 5.672340000  | -1.924132000 | 4.270462000  |
| C  | 6.619269000  | -1.983430000 | 3.237701000  |
| C  | 4.877261000  | -0.775586000 | 4.371876000  |
| C  | 6.772291000  | -0.926065000 | 2.341228000  |
| C  | 5.027489000  | 0.285331000  | 3.476136000  |
| C  | 5.975410000  | 0.215095000  | 2.455985000  |
| H  | 5.703259000  | -4.025224000 | 4.789013000  |
| H  | 4.572345000  | -3.053489000 | 5.755350000  |
| H  | 6.310883000  | -2.955068000 | 6.053501000  |
| H  | 7.254530000  | -2.862260000 | 3.147680000  |
| H  | 4.146226000  | -0.705591000 | 5.175524000  |
| H  | 7.526702000  | -0.987072000 | 1.560894000  |
| H  | 4.408601000  | 1.173390000  | 3.581162000  |
| H  | 6.092286000  | 1.040654000  | 1.760422000  |
| C  | -6.662172000 | 2.281366000  | 5.299433000  |
| C  | -5.616458000 | 1.651628000  | 4.410355000  |
| C  | -5.174518000 | 0.337565000  | 4.622129000  |
| C  | -5.023137000 | 2.381191000  | 3.370278000  |
| C  | -4.163734000 | -0.228168000 | 3.839746000  |
| C  | -4.028235000 | 1.824364000  | 2.568644000  |
| C  | -3.597351000 | 0.522557000  | 2.812341000  |
| O  | -2.631810000 | -0.083827000 | 1.995211000  |
| H  | -7.375853000 | 1.538350000  | 5.667351000  |
| H  | -7.216461000 | 3.062456000  | 4.770945000  |
| H  | -6.192364000 | 2.746545000  | 6.174705000  |
| H  | -5.608885000 | -0.249577000 | 5.427548000  |
| H  | -5.334813000 | 3.404209000  | 3.175751000  |
| H  | -3.793840000 | -1.230667000 | 4.041170000  |
| H  | -3.588250000 | 2.403719000  | 1.762959000  |

|   |              |              |              |
|---|--------------|--------------|--------------|
| H | -1.902380000 | 0.551832000  | 1.855405000  |
| C | -8.433753000 | 0.038240000  | -1.015280000 |
| C | -7.964670000 | 1.478245000  | -1.257590000 |
| C | -6.911882000 | 1.957513000  | -0.246075000 |
| N | -5.655900000 | 1.195240000  | -0.290313000 |
| C | -4.579367000 | 1.516806000  | -1.003161000 |
| N | -4.588881000 | 2.512347000  | -1.903125000 |
| N | -3.433400000 | 0.832095000  | -0.819602000 |
| H | -7.617522000 | -0.682446000 | -1.130759000 |
| H | -9.217659000 | -0.236036000 | -1.726276000 |
| H | -8.852394000 | -0.066656000 | -0.006491000 |
| H | -7.565239000 | 1.572446000  | -2.276788000 |
| H | -8.815070000 | 2.167640000  | -1.191399000 |
| H | -7.292338000 | 1.857337000  | 0.775690000  |
| H | -6.667492000 | 3.015890000  | -0.388554000 |
| H | -5.595655000 | 0.341199000  | 0.273105000  |
| H | -5.457923000 | 2.842129000  | -2.295936000 |
| H | -3.709395000 | 2.736072000  | -2.373932000 |
| H | -3.250566000 | 0.385065000  | 0.076867000  |
| H | -2.644386000 | 1.076489000  | -1.413972000 |
| C | 7.318474000  | 5.612016000  | 0.827149000  |
| C | 6.462767000  | 5.142901000  | -0.313895000 |
| C | 6.603888000  | 5.475127000  | -1.640103000 |
| C | 5.345378000  | 4.237619000  | -0.249949000 |
| N | 5.641691000  | 4.830081000  | -2.403067000 |
| C | 4.857789000  | 4.054124000  | -1.581205000 |
| C | 4.711278000  | 3.550683000  | 0.799227000  |
| C | 3.795257000  | 3.192806000  | -1.876384000 |
| C | 3.650425000  | 2.700236000  | 0.511032000  |
| C | 3.203603000  | 2.512498000  | -0.813050000 |
| H | 6.723993000  | 6.143316000  | 1.580046000  |
| H | 8.100746000  | 6.290213000  | 0.476576000  |
| H | 7.804261000  | 4.767556000  | 1.330698000  |
| H | 7.324413000  | 6.127699000  | -2.114086000 |
| H | 5.556392000  | 4.903717000  | -3.406069000 |
| H | 5.054106000  | 3.675296000  | 1.823172000  |
| H | 3.467935000  | 3.033601000  | -2.901859000 |
| H | 3.173599000  | 2.150509000  | 1.315703000  |
| H | 2.416205000  | 1.787327000  | -1.004742000 |
| C | 1.226249000  | 5.750891000  | 0.175051000  |
| C | -0.252031000 | 5.592165000  | 0.436874000  |
| C | -0.713078000 | 4.909452000  | 1.572338000  |
| C | -1.213035000 | 6.123700000  | -0.434183000 |
| C | -2.071428000 | 4.756806000  | 1.832469000  |
| C | -2.581289000 | 5.959986000  | -0.201808000 |
| C | -3.011099000 | 5.274920000  | 0.936565000  |
| O | -4.345015000 | 5.064181000  | 1.221007000  |
| H | 1.659166000  | 6.520166000  | 0.825755000  |
| H | 1.418989000  | 6.056015000  | -0.858455000 |
| H | 1.775817000  | 4.823113000  | 0.368329000  |
| H | 0.005868000  | 4.497444000  | 2.275570000  |
| H | -0.891103000 | 6.674402000  | -1.315177000 |
| H | -2.413115000 | 4.255013000  | 2.731682000  |
| H | -3.306498000 | 6.380630000  | -0.895748000 |
| H | -4.883236000 | 5.641680000  | 0.655422000  |

### 3B. PceA/TCE, Co<sup>I</sup> (Charge = 1, Multiplicity = 1)

|    |              |              |              |
|----|--------------|--------------|--------------|
| Co | 0.497713000  | -2.087840000 | -1.604582000 |
| C  | -1.812028000 | -3.597697000 | -1.036794000 |
| C  | -3.379027000 | -3.411394000 | -1.030589000 |
| C  | -3.601784000 | -2.495514000 | -2.288346000 |
| C  | -2.261738000 | -1.805529000 | -2.451272000 |
| C  | -2.028074000 | -0.660467000 | -3.277455000 |
| C  | -0.734234000 | -0.252404000 | -3.558169000 |
| C  | -0.287779000 | 0.912914000  | -4.464313000 |
| C  | 1.080686000  | 0.361334000  | -4.952982000 |
| C  | 1.500402000  | -0.437042000 | -3.746708000 |
| C  | 2.814414000  | -0.723270000 | -3.430009000 |
| C  | 3.236406000  | -1.496706000 | -2.357170000 |
| C  | 4.695931000  | -1.648582000 | -1.967460000 |
| C  | 4.612297000  | -2.793688000 | -0.920771000 |
| C  | 3.139887000  | -2.807556000 | -0.542039000 |
| C  | 2.641531000  | -3.488169000 | 0.552545000  |
| C  | 1.238604000  | -3.694004000 | 0.719693000  |
| C  | 0.539149000  | -4.434497000 | 1.870693000  |
| C  | -0.863446000 | -4.699435000 | 1.228566000  |
| C  | -1.025039000 | -3.505002000 | 0.288589000  |
| C  | -1.361631000 | -4.838457000 | -1.829319000 |
| N  | -1.306246000 | -2.385502000 | -1.752183000 |
| N  | 0.412993000  | -0.869841000 | -3.048967000 |
| N  | 2.392021000  | -2.126998000 | -1.498787000 |
| N  | 0.363359000  | -3.199322000 | -0.136351000 |
| C  | -4.145467000 | -4.742490000 | -1.075351000 |
| C  | -3.819363000 | -2.622219000 | 0.219965000  |
| C  | -5.284357000 | -2.195973000 | 0.265692000  |
| O  | -6.127633000 | -2.429106000 | -0.587943000 |
| N  | -5.617541000 | -1.420782000 | 1.377926000  |
| C  | -4.072683000 | -3.207418000 | -3.569719000 |
| C  | -3.247092000 | 0.020828000  | -3.876244000 |
| C  | -1.183741000 | 1.351064000  | -5.629750000 |
| C  | 0.071561000  | 2.148693000  | -3.566895000 |
| C  | -0.989776000 | 2.544296000  | -2.568646000 |
| O  | -2.117240000 | 2.948497000  | -2.921743000 |
| N  | -0.653760000 | 2.422111000  | -1.269126000 |

|    |              |              |              |
|----|--------------|--------------|--------------|
| C  | 5.157223000  | -0.352057000 | -1.266059000 |
| C  | 5.619287000  | -1.924560000 | -3.163430000 |
| C  | 5.020291000  | -4.185591000 | -1.444025000 |
| C  | 3.613435000  | -4.055062000 | 1.566966000  |
| C  | 0.443941000  | -3.483480000 | 3.086301000  |
| C  | 1.155443000  | -5.779937000 | 2.292045000  |
| C  | -1.996328000 | -4.922617000 | 2.229109000  |
| C  | 0.993292000  | -0.549858000 | -6.191743000 |
| H  | -4.372046000 | -1.757750000 | -2.046817000 |
| H  | 1.775853000  | 1.184895000  | -5.159845000 |
| H  | 3.579423000  | -0.292101000 | -4.068152000 |
| H  | 5.242044000  | -2.545857000 | -0.059627000 |
| H  | -0.749815000 | -5.603562000 | 0.617127000  |
| H  | -1.385048000 | -2.629812000 | 0.847055000  |
| H  | -0.269948000 | -4.844513000 | -1.887037000 |
| H  | -1.750781000 | -4.808047000 | -2.849036000 |
| H  | -1.699405000 | -5.764617000 | -1.356572000 |
| H  | -3.895158000 | -5.332927000 | -1.958034000 |
| H  | -5.221555000 | -4.559377000 | -1.086217000 |
| H  | -3.910395000 | -5.348580000 | -0.193437000 |
| H  | -3.206763000 | -1.722071000 | 0.336676000  |
| H  | -3.637010000 | -3.213730000 | 1.124309000  |
| H  | -6.609841000 | -1.407755000 | 1.595949000  |
| H  | -5.008988000 | -1.426301000 | 2.192323000  |
| H  | -4.179652000 | -2.486172000 | -4.384470000 |
| H  | -5.047227000 | -3.675866000 | -3.406552000 |
| H  | -3.364974000 | -3.972927000 | -3.898563000 |
| H  | -3.451823000 | -0.312586000 | -4.900075000 |
| H  | -3.133385000 | 1.103165000  | -3.899684000 |
| H  | -4.138559000 | -0.203080000 | -3.284159000 |
| H  | -0.579271000 | 1.939834000  | -6.329837000 |
| H  | -2.005843000 | 1.985027000  | -5.297836000 |
| H  | -1.589477000 | 0.494918000  | -6.173543000 |
| H  | 0.241103000  | 3.010613000  | -4.222930000 |
| H  | 1.006665000  | 1.939381000  | -3.038125000 |
| H  | -1.228880000 | 2.864088000  | -0.560595000 |
| H  | 0.271239000  | 2.122815000  | -0.990018000 |
| H  | 1.972836000  | -0.995293000 | -6.388798000 |
| H  | 0.685873000  | 0.008057000  | -7.081654000 |
| H  | 0.279520000  | -1.363348000 | -6.022772000 |
| H  | 5.067227000  | 0.510993000  | -1.932306000 |
| H  | 6.204173000  | -0.448907000 | -0.958266000 |
| H  | 4.556190000  | -0.154119000 | -0.374603000 |
| H  | 5.653531000  | -1.053549000 | -3.826491000 |
| H  | 5.289755000  | -2.784766000 | -3.752460000 |
| H  | 6.642396000  | -2.108922000 | -2.818570000 |
| H  | 6.071024000  | -4.200085000 | -1.749409000 |
| H  | 4.404310000  | -4.476581000 | -2.301232000 |
| H  | 4.884950000  | -4.938635000 | -0.663134000 |
| H  | 4.587104000  | -3.571002000 | 1.493923000  |
| H  | 3.764463000  | -5.134712000 | 1.450518000  |
| H  | 3.261130000  | -3.884607000 | 2.587831000  |
| H  | 1.444725000  | -3.216252000 | 3.438623000  |
| H  | -0.081998000 | -3.965017000 | 3.918116000  |
| H  | -0.079299000 | -2.555764000 | 2.830999000  |
| H  | 1.447749000  | -6.370239000 | 1.417514000  |
| H  | 0.411750000  | -6.356468000 | 2.854714000  |
| H  | 2.026551000  | -5.661623000 | 2.938906000  |
| H  | -1.726274000 | -5.689396000 | 2.963123000  |
| H  | -2.905543000 | -5.267006000 | 1.726741000  |
| H  | -2.234843000 | -4.004275000 | 2.777472000  |
| C  | 1.691179000  | 0.160306000  | 2.977920000  |
| C  | 0.885577000  | 0.618967000  | 2.017287000  |
| Cl | 0.669633000  | -0.295130000 | 0.493704000  |
| Cl | -0.040094000 | 2.088054000  | 2.158530000  |
| Cl | 1.929676000  | 0.935252000  | 4.501228000  |
| H  | 2.264446000  | -0.747845000 | 2.831328000  |
| C  | 5.661267000  | -3.575418000 | 4.790350000  |
| C  | 5.847616000  | -2.399571000 | 3.855992000  |
| C  | 6.800180000  | -2.452852000 | 2.816477000  |
| C  | 5.099972000  | -1.215935000 | 4.009299000  |
| C  | 7.003786000  | -1.358010000 | 1.964611000  |
| C  | 5.304336000  | -0.115986000 | 3.160217000  |
| C  | 6.256486000  | -0.181395000 | 2.134278000  |
| H  | 5.608744000  | -4.527178000 | 4.232137000  |
| H  | 4.740084000  | -3.474871000 | 5.388517000  |
| H  | 6.510543000  | -3.657286000 | 5.493951000  |
| H  | 7.393177000  | -3.364708000 | 2.677777000  |
| H  | 4.358139000  | -1.146147000 | 4.814127000  |
| H  | 7.752997000  | -1.421544000 | 1.167690000  |
| H  | 4.723202000  | 0.799704000  | 3.311148000  |
| H  | 6.412642000  | 0.678217000  | 1.475112000  |
| C  | -6.401265000 | 2.000579000  | 5.810263000  |
| C  | -5.392443000 | 1.456020000  | 4.825101000  |
| C  | -4.855822000 | 0.169267000  | 4.975753000  |
| C  | -4.929584000 | 2.236016000  | 3.755960000  |
| C  | -3.878404000 | -0.320376000 | 4.106008000  |
| C  | -3.963069000 | 1.758671000  | 2.871709000  |
| C  | -3.436003000 | 0.482103000  | 3.055998000  |
| O  | -2.512411000 | -0.055348000 | 2.150336000  |
| H  | -7.056672000 | 1.210436000  | 6.189302000  |
| H  | -7.022831000 | 2.777389000  | 5.355076000  |
| H  | -5.893095000 | 2.448313000  | 6.673248000  |
| H  | -5.191439000 | -0.456930000 | 5.799068000  |
| H  | -5.326875000 | 3.236359000  | 3.599487000  |

|   |              |              |              |
|---|--------------|--------------|--------------|
| H | -3.439905000 | -1.304820000 | 4.248128000  |
| H | -3.631104000 | 2.379854000  | 2.046694000  |
| H | -1.766671000 | 0.574512000  | 2.062482000  |
| C | -8.496830000 | 0.335872000  | -0.583737000 |
| C | -7.912570000 | 1.732564000  | -0.829052000 |
| C | -6.774222000 | 2.114267000  | 0.134008000  |
| N | -5.572655000 | 1.278427000  | 0.014628000  |
| C | -4.495893000 | 1.564192000  | -0.725833000 |
| N | -4.514235000 | 2.574565000  | -1.632782000 |
| N | -3.352985000 | 0.887459000  | -0.522477000 |
| H | -7.743339000 | -0.457874000 | -0.732999000 |
| H | -9.332235000 | 0.134963000  | -1.274656000 |
| H | -8.889393000 | 0.252324000  | 0.446879000  |
| H | -7.551949000 | 1.810696000  | -1.874060000 |
| H | -8.700926000 | 2.500016000  | -0.718060000 |
| H | -7.110887000 | 2.024250000  | 1.181554000  |
| H | -6.476253000 | 3.166739000  | -0.008284000 |
| H | -5.529232000 | 0.411802000  | 0.578148000  |
| H | -5.381673000 | 2.743242000  | -2.140785000 |
| H | -3.616534000 | 2.772533000  | -2.143676000 |
| H | -3.174290000 | 0.386733000  | 0.358582000  |
| H | -2.611963000 | 0.877927000  | -1.225766000 |
| C | 7.456268000  | 5.390808000  | 1.011354000  |
| C | 6.506934000  | 5.051198000  | -0.105679000 |
| C | 6.538935000  | 5.544400000  | -1.397572000 |
| C | 5.393851000  | 4.127789000  | -0.062234000 |
| N | 5.518938000  | 4.983721000  | -2.153151000 |
| C | 4.801955000  | 4.103471000  | -1.369591000 |
| C | 4.839133000  | 3.306797000  | 0.945782000  |
| C | 3.712667000  | 3.273087000  | -1.688465000 |
| C | 3.752334000  | 2.484297000  | 0.634869000  |
| C | 3.202768000  | 2.459737000  | -0.670916000 |
| H | 6.921766000  | 5.816228000  | 1.881171000  |
| H | 8.208739000  | 6.126696000  | 0.683777000  |
| H | 7.992991000  | 4.492050000  | 1.368460000  |
| H | 7.225828000  | 6.263268000  | -1.846789000 |
| H | 5.346210000  | 5.175976000  | -3.134987000 |
| H | 5.263283000  | 3.307467000  | 1.955909000  |
| H | 3.296073000  | 3.244712000  | -2.701344000 |
| H | 3.329521000  | 1.828660000  | 1.400963000  |
| H | 2.405075000  | 1.743147000  | -0.896572000 |
| C | 1.347169000  | 5.716634000  | 0.645316000  |
| C | -0.144317000 | 5.490165000  | 0.691091000  |
| C | -0.803073000 | 5.191587000  | 1.903381000  |
| C | -0.922883000 | 5.509278000  | -0.480174000 |
| C | -2.160477000 | 4.848795000  | 1.942054000  |
| C | -2.286180000 | 5.178519000  | -0.462588000 |
| C | -2.900461000 | 4.808377000  | 0.746391000  |
| O | -4.212507000 | 4.397533000  | 0.802066000  |
| H | 1.705306000  | 6.248595000  | 1.543231000  |
| H | 1.641659000  | 6.301936000  | -0.241758000 |
| H | 1.890916000  | 4.753430000  | 0.597410000  |
| H | -0.234654000 | 5.206728000  | 2.840171000  |
| H | -0.455291000 | 5.767457000  | -1.436868000 |
| H | -2.652920000 | 4.607057000  | 2.888700000  |
| H | -2.864549000 | 5.195335000  | -1.392247000 |
| H | -4.494915000 | 4.196034000  | -0.113605000 |

### 3C. PceA/TCE, Co<sup>I</sup> → Co<sup>III</sup> Transition State (Charge = 1, Multiplicity = 1)

|    |              |              |              |
|----|--------------|--------------|--------------|
| Co | 0.592538000  | -2.197466000 | -1.353774000 |
| C  | -1.709092000 | -3.870215000 | -1.150728000 |
| C  | -3.268320000 | -3.640741000 | -1.201260000 |
| C  | -3.416969000 | -2.670329000 | -2.426576000 |
| C  | -2.066837000 | -1.985116000 | -2.477189000 |
| C  | -1.789356000 | -0.781732000 | -3.216383000 |
| C  | -0.491594000 | -0.346004000 | -3.379893000 |
| C  | 0.020435000  | 0.863353000  | -4.187384000 |
| C  | 1.424282000  | 0.326507000  | -4.598074000 |
| C  | 1.749859000  | -0.533862000 | -3.407458000 |
| C  | 3.037145000  | -0.844626000 | -3.005697000 |
| C  | 3.379265000  | -1.609562000 | -1.899011000 |
| C  | 4.808816000  | -1.937397000 | -1.532249000 |
| C  | 4.639864000  | -2.409138000 | -0.057721000 |
| C  | 3.161889000  | -2.776612000 | 0.008620000  |
| C  | 2.562748000  | -3.512050000 | 1.011831000  |
| C  | 1.189291000  | -3.909936000 | 0.921932000  |
| C  | 0.426118000  | -4.814867000 | 1.905310000  |
| C  | -0.844171000 | -5.160690000 | 1.053635000  |
| C  | -1.009254000 | -3.889158000 | 0.221604000  |
| C  | -1.224301000 | -5.051050000 | -2.008408000 |
| N  | -1.170162000 | -2.612109000 | -1.760153000 |
| N  | 0.619129000  | -0.987448000 | -2.819445000 |
| N  | 2.488664000  | -2.205494000 | -1.071150000 |
| N  | 0.394103000  | -3.484606000 | -0.032514000 |
| C  | -4.071431000 | -4.941504000 | -1.336680000 |
| C  | -3.712420000 | -2.874380000 | 0.063754000  |
| C  | -5.167050000 | -2.409071000 | 0.100805000  |
| O  | -6.004885000 | -2.613170000 | -0.769816000 |
| N  | -5.475791000 | -1.672803000 | 1.229101000  |
| C  | -3.826254000 | -3.306627000 | -3.767395000 |
| C  | -2.970082000 | -0.067020000 | -3.842489000 |
| C  | -0.781117000 | 1.347052000  | -5.402476000 |
| C  | 0.308314000  | 2.041458000  | -3.196792000 |
| C  | -0.870060000 | 2.542443000  | -2.385906000 |

|    |              |              |              |
|----|--------------|--------------|--------------|
| O  | -1.936587000 | 2.902018000  | -2.925352000 |
| N  | -0.693638000 | 2.588560000  | -1.055289000 |
| C  | 5.781622000  | -0.756906000 | -1.647473000 |
| C  | 5.257816000  | -3.083587000 | -2.474463000 |
| C  | 5.693458000  | -3.444913000 | 0.360782000  |
| C  | 3.364581000  | -3.857115000 | 2.249176000  |
| C  | 0.034220000  | -3.997169000 | 3.159209000  |
| C  | 1.155207000  | -6.111032000 | 2.294121000  |
| C  | -2.060147000 | -5.601948000 | 1.865561000  |
| C  | 1.431734000  | -0.526777000 | -5.881438000 |
| H  | -4.184598000 | -1.930643000 | -2.185491000 |
| H  | 2.137306000  | 1.152200000  | -4.706532000 |
| H  | 3.849699000  | -0.437975000 | -3.598871000 |
| H  | 4.763924000  | -1.522482000 | 0.582859000  |
| H  | -0.550971000 | -5.975963000 | 0.379638000  |
| H  | -1.433073000 | -3.086665000 | 0.836225000  |
| H  | -0.130037000 | -5.076943000 | -1.997455000 |
| H  | -1.549946000 | -4.942822000 | -3.044721000 |
| H  | -1.600412000 | -6.002481000 | -1.623959000 |
| H  | -3.793201000 | -5.508311000 | -2.227527000 |
| H  | -5.138098000 | -4.717566000 | -1.393486000 |
| H  | -3.906032000 | -5.585330000 | -0.467498000 |
| H  | -3.081709000 | -1.990322000 | 0.220340000  |
| H  | -3.571506000 | -3.503378000 | 0.950392000  |
| H  | -6.457436000 | -1.607632000 | 1.474854000  |
| H  | -4.807836000 | -1.606167000 | 1.990632000  |
| H  | -3.869156000 | -2.545437000 | -4.550904000 |
| H  | -4.820395000 | -3.751742000 | -3.679029000 |
| H  | -3.124360000 | -4.078781000 | -4.092604000 |
| H  | -3.117175000 | -0.356940000 | -4.889049000 |
| H  | -2.843177000 | 1.012606000  | -3.809891000 |
| H  | -3.890385000 | -0.305671000 | -3.306054000 |
| H  | -0.126953000 | 1.971784000  | -6.021920000 |
| H  | -1.632529000 | 1.959403000  | -5.111239000 |
| H  | -1.129189000 | 0.512473000  | -6.015847000 |
| H  | 0.666596000  | 2.894512000  | -3.787052000 |
| H  | 1.117363000  | 1.752427000  | -2.518693000 |
| H  | -1.349251000 | 3.091936000  | -0.465247000 |
| H  | 0.153042000  | 2.261248000  | -0.607773000 |
| H  | 2.418789000  | -0.977325000 | -6.022372000 |
| H  | 1.204487000  | 0.080291000  | -6.761962000 |
| H  | 0.695354000  | -1.334570000 | -5.812638000 |
| H  | 5.917138000  | -0.451335000 | -2.691579000 |
| H  | 6.764635000  | -1.051497000 | -1.264590000 |
| H  | 5.434684000  | 0.101390000  | -1.067556000 |
| H  | 5.212991000  | -2.744291000 | -3.514413000 |
| H  | 4.609546000  | -3.960077000 | -2.372504000 |
| H  | 6.287444000  | -3.383578000 | -2.259173000 |
| H  | 6.669789000  | -3.128144000 | -0.020463000 |
| H  | 5.474804000  | -4.438418000 | -0.041898000 |
| H  | 5.794308000  | -3.515863000 | 1.442378000  |
| H  | 4.065571000  | -3.052911000 | 2.478949000  |
| H  | 3.928798000  | -4.790699000 | 2.148890000  |
| H  | 2.715480000  | -3.960427000 | 3.117966000  |
| H  | 0.916304000  | -3.617669000 | 3.679792000  |
| H  | -0.517842000 | -4.629596000 | 3.861498000  |
| H  | -0.592983000 | -3.138697000 | 2.897956000  |
| H  | 1.594991000  | -6.590929000 | 1.413660000  |
| H  | 0.437223000  | -6.809624000 | 2.738108000  |
| H  | 1.944941000  | -5.948991000 | 3.029454000  |
| H  | -1.798444000 | -6.421748000 | 2.542709000  |
| H  | -2.858052000 | -5.966092000 | 1.213289000  |
| H  | -2.463639000 | -4.784127000 | 2.471020000  |
| C  | 0.372420000  | 0.089850000  | 3.380544000  |
| C  | -0.359536000 | 0.691664000  | 2.435124000  |
| Cl | 0.061536000  | -0.657452000 | 0.226688000  |
| Cl | -0.238090000 | 2.421186000  | 2.209390000  |
| Cl | 1.412924000  | 0.864380000  | 4.556952000  |
| H  | 0.344266000  | -0.986484000 | 3.500563000  |
| C  | 5.896732000  | -2.430497000 | 5.094444000  |
| C  | 5.831870000  | -1.434784000 | 3.954704000  |
| C  | 6.941392000  | -1.209474000 | 3.113842000  |
| C  | 4.669477000  | -0.666582000 | 3.737348000  |
| C  | 6.900485000  | -0.228862000 | 2.109730000  |
| C  | 4.623026000  | 0.312000000  | 2.734195000  |
| C  | 5.743483000  | 0.544064000  | 1.921221000  |
| H  | 6.598045000  | -3.254582000 | 4.877587000  |
| H  | 4.904586000  | -2.864365000 | 5.308823000  |
| H  | 6.245094000  | -1.936756000 | 6.021173000  |
| H  | 7.854356000  | -1.799601000 | 3.257992000  |
| H  | 3.790297000  | -0.822909000 | 4.372656000  |
| H  | 7.780427000  | -0.061255000 | 1.478424000  |
| H  | 3.712993000  | 0.901701000  | 2.593322000  |
| H  | 5.709268000  | 1.325521000  | 1.154951000  |
| C  | -6.249448000 | 3.050461000  | 5.349938000  |
| C  | -5.362806000 | 2.199466000  | 4.469282000  |
| C  | -5.158432000 | 0.841110000  | 4.746072000  |
| C  | -4.680442000 | 2.750769000  | 3.374650000  |
| C  | -4.300423000 | 0.061803000  | 3.968985000  |
| C  | -3.822875000 | 1.982475000  | 2.590413000  |
| C  | -3.629763000 | 0.624532000  | 2.876894000  |
| O  | -2.838479000 | -0.173753000 | 2.078240000  |
| H  | -7.055359000 | 2.459251000  | 5.796078000  |
| H  | -6.697947000 | 3.874650000  | 4.786024000  |
| H  | -5.671588000 | 3.492168000  | 6.171639000  |

|   |              |              |              |
|---|--------------|--------------|--------------|
| H | -5.666374000 | 0.386378000  | 5.594060000  |
| H | -4.820539000 | 3.798747000  | 3.118922000  |
| H | -4.124825000 | -0.983476000 | 4.215407000  |
| H | -3.297086000 | 2.436693000  | 1.756751000  |
| H | -1.758258000 | 0.141275000  | 2.150007000  |
| C | -8.426859000 | 0.230737000  | -0.595997000 |
| C | -7.808556000 | 1.614023000  | -0.848724000 |
| C | -6.632811000 | 1.957528000  | 0.085015000  |
| N | -5.459882000 | 1.093612000  | -0.074463000 |
| C | -4.346114000 | 1.398320000  | -0.762262000 |
| N | -4.333311000 | 2.402278000  | -1.657604000 |
| N | -3.238891000 | 0.667904000  | -0.530241000 |
| H | -7.697873000 | -0.580451000 | -0.773401000 |
| H | -9.286744000 | 0.058200000  | -1.264444000 |
| H | -8.790854000 | 0.149864000  | 0.445243000  |
| H | -7.472272000 | 1.686661000  | -1.902077000 |
| H | -8.574792000 | 2.400144000  | -0.712512000 |
| H | -6.944449000 | 1.874773000  | 1.141244000  |
| H | -6.300910000 | 3.001308000  | -0.054376000 |
| H | -5.411926000 | 0.232399000  | 0.487754000  |
| H | -5.210227000 | 2.737775000  | -2.045214000 |
| H | -3.439855000 | 2.688581000  | -2.120314000 |
| H | -3.083556000 | 0.275449000  | 0.431147000  |
| H | -2.389092000 | 0.858151000  | -1.059343000 |
| C | 7.453199000  | 5.736520000  | -0.269408000 |
| C | 6.588269000  | 4.645985000  | -0.848843000 |
| C | 6.789412000  | 3.990249000  | -2.049487000 |
| C | 5.388910000  | 4.064615000  | -0.276932000 |
| N | 5.792485000  | 3.045181000  | -2.257453000 |
| C | 4.915125000  | 3.065536000  | -1.190722000 |
| C | 4.669293000  | 4.273804000  | 0.922707000  |
| C | 3.769676000  | 2.289106000  | -0.933202000 |
| C | 3.531554000  | 3.503335000  | 1.184257000  |
| C | 3.087581000  | 2.517580000  | 0.267651000  |
| H | 6.876636000  | 6.667450000  | -0.115278000 |
| H | 8.299398000  | 5.967196000  | -0.936995000 |
| H | 7.864681000  | 5.442554000  | 0.714010000  |
| H | 7.582270000  | 4.125852000  | -2.786719000 |
| H | 5.724593000  | 2.434624000  | -3.065243000 |
| H | 5.006528000  | 5.026026000  | 1.643868000  |
| H | 3.437584000  | 1.514461000  | -1.632359000 |
| H | 2.973445000  | 3.647977000  | 2.115040000  |
| H | 2.218231000  | 1.900831000  | 0.522471000  |
| C | 1.333540000  | 5.896561000  | -0.559632000 |
| C | -0.140293000 | 5.742932000  | -0.257787000 |
| C | -0.587343000 | 5.448559000  | 1.047052000  |
| C | -1.114091000 | 5.821613000  | -1.271732000 |
| C | -1.937381000 | 5.206004000  | 1.330923000  |
| C | -2.471662000 | 5.584651000  | -1.007996000 |
| C | -2.888005000 | 5.266699000  | 0.296966000  |
| O | -4.200928000 | 5.007646000  | 0.617980000  |
| H | 1.877164000  | 6.346066000  | 0.287858000  |
| H | 1.500606000  | 6.524580000  | -1.451217000 |
| H | 1.801376000  | 4.911422000  | -0.747224000 |
| H | 0.140872000  | 5.395979000  | 1.864125000  |
| H | -0.811067000 | 6.054737000  | -2.298495000 |
| H | -2.265089000 | 4.972828000  | 2.347937000  |
| H | -3.204147000 | 5.639119000  | -1.822245000 |
| H | -4.754307000 | 5.212123000  | -0.156349000 |

### 3D. PceA/TCE, Co<sup>III</sup> (Charge = 1, Multiplicity = 1)

|    |              |              |              |
|----|--------------|--------------|--------------|
| Co | 0.526287000  | -1.996342000 | -1.658297000 |
| C  | -1.833570000 | -3.487363000 | -1.073070000 |
| C  | -3.395743000 | -3.269462000 | -1.116050000 |
| C  | -3.569086000 | -2.402981000 | -2.417526000 |
| C  | -2.218071000 | -1.742899000 | -2.572631000 |
| C  | -1.949516000 | -0.600216000 | -3.405794000 |
| C  | -0.652330000 | -0.262373000 | -3.721751000 |
| C  | -0.153691000 | 0.892393000  | -4.607774000 |
| C  | 1.177902000  | 0.268222000  | -5.129454000 |
| C  | 1.564824000  | -0.578852000 | -3.947437000 |
| C  | 2.870643000  | -0.906207000 | -3.620585000 |
| C  | 3.271732000  | -1.639800000 | -2.512609000 |
| C  | 4.722404000  | -1.808279000 | -2.107275000 |
| C  | 4.610314000  | -2.927955000 | -1.035501000 |
| C  | 3.143586000  | -2.880766000 | -0.646455000 |
| C  | 2.620545000  | -3.501227000 | 0.467679000  |
| C  | 1.204510000  | -3.600779000 | 0.677701000  |
| C  | 0.483319000  | -4.222062000 | 1.882292000  |
| C  | -0.952027000 | -4.433598000 | 1.288075000  |
| C  | -1.064000000 | -3.306380000 | 0.258487000  |
| C  | -1.388146000 | -4.782468000 | -1.778226000 |
| N  | -1.296148000 | -2.333370000 | -1.861936000 |
| N  | 0.469400000  | -0.959038000 | -3.254117000 |
| N  | 2.419258000  | -2.203855000 | -1.621516000 |
| N  | 0.343058000  | -3.099981000 | -0.171211000 |
| C  | -4.178203000 | -4.591076000 | -1.127413000 |
| C  | -3.855249000 | -2.406787000 | 0.074515000  |
| C  | -5.333562000 | -2.012493000 | 0.063549000  |
| O  | -6.110026000 | -2.224188000 | -0.867066000 |
| N  | -5.737746000 | -1.324519000 | 1.179311000  |
| C  | -4.008414000 | -3.139726000 | -3.695652000 |
| C  | -3.144890000 | 0.166544000  | -3.931580000 |
| C  | -1.036333000 | 1.392447000  | -5.756823000 |

|    |              |              |              |
|----|--------------|--------------|--------------|
| C  | 0.290951000  | 2.065686000  | -3.673289000 |
| C  | -0.766030000 | 2.696987000  | -2.782148000 |
| O  | -1.850909000 | 3.119173000  | -3.228799000 |
| N  | -0.439408000 | 2.814290000  | -1.482343000 |
| C  | 5.158142000  | -0.489813000 | -1.422726000 |
| C  | 5.665499000  | -2.110807000 | -3.279591000 |
| C  | 4.968188000  | -4.342219000 | -1.535500000 |
| C  | 3.561632000  | -4.120929000 | 1.470697000  |
| C  | 0.493905000  | -3.159253000 | 3.006738000  |
| C  | 1.015106000  | -5.570775000 | 2.394443000  |
| C  | -2.068375000 | -4.486497000 | 2.330253000  |
| C  | 1.029989000  | -0.607258000 | -6.388532000 |
| H  | -4.330246000 | -1.645638000 | -2.222613000 |
| H  | 1.922057000  | 1.050229000  | -5.319044000 |
| H  | 3.649606000  | -0.515070000 | -4.266018000 |
| H  | 5.245153000  | -2.681543000 | -0.178218000 |
| H  | -0.920022000 | -5.391120000 | 0.752399000  |
| H  | -1.391122000 | -2.371030000 | 0.731184000  |
| H  | -0.295917000 | -4.825223000 | -1.817509000 |
| H  | -1.764431000 | -4.815596000 | -2.802612000 |
| H  | -1.752381000 | -5.666967000 | -1.250791000 |
| H  | -3.923173000 | -5.221331000 | -1.981630000 |
| H  | -5.249170000 | -4.386107000 | -1.166137000 |
| H  | -3.971572000 | -5.161959000 | -0.215056000 |
| H  | -3.276182000 | -1.478916000 | 0.138443000  |
| H  | -3.663865000 | -2.922103000 | 1.019617000  |
| H  | -6.735911000 | -1.208752000 | 1.309033000  |
| H  | -5.150638000 | -1.242612000 | 2.007035000  |
| H  | -4.078606000 | -2.437638000 | -4.531692000 |
| H  | -4.996708000 | -3.579819000 | -3.542654000 |
| H  | -3.309299000 | -3.930398000 | -3.981727000 |
| H  | -3.415744000 | -0.142608000 | -4.947644000 |
| H  | -2.951352000 | 1.237370000  | -3.944940000 |
| H  | -4.015470000 | -0.005071000 | -3.295657000 |
| H  | -0.410746000 | 1.969562000  | -6.447564000 |
| H  | -1.825131000 | 2.054723000  | -5.404856000 |
| H  | -1.478448000 | 0.563551000  | -6.314952000 |
| H  | 0.674010000  | 2.871416000  | -4.313369000 |
| H  | 1.121750000  | 1.721344000  | -3.048883000 |
| H  | -0.979545000 | 3.430714000  | -0.877723000 |
| H  | 0.400752000  | 2.396218000  | -1.102505000 |
| H  | 1.979889000  | -1.103172000 | -6.609302000 |
| H  | 0.751381000  | -0.003548000 | -7.256336000 |
| H  | 0.268312000  | -1.380235000 | -6.240656000 |
| H  | 5.112746000  | 0.351440000  | -2.120327000 |
| H  | 6.185588000  | -0.588449000 | -1.057077000 |
| H  | 4.511288000  | -0.260385000 | -0.573415000 |
| H  | 5.722472000  | -1.251425000 | -3.955391000 |
| H  | 5.345445000  | -2.980690000 | -3.859602000 |
| H  | 6.678121000  | -2.294959000 | -2.906885000 |
| H  | 6.019109000  | -4.396182000 | -1.832821000 |
| H  | 4.348475000  | -4.624643000 | -2.393070000 |
| H  | 4.803484000  | -5.077748000 | -0.744308000 |
| H  | 4.572046000  | -3.728300000 | 1.365800000  |
| H  | 3.604883000  | -5.211968000 | 1.375750000  |
| H  | 3.246357000  | -3.887933000 | 2.488256000  |
| H  | 1.519004000  | -2.917983000 | 3.300948000  |
| H  | -0.027548000 | -3.537874000 | 3.891455000  |
| H  | 0.016252000  | -2.228530000 | 2.686548000  |
| H  | 1.254091000  | -6.247640000 | 1.567401000  |
| H  | 0.237343000  | -6.046323000 | 3.002158000  |
| H  | 1.897053000  | -5.465348000 | 3.027984000  |
| H  | -1.826719000 | -5.199472000 | 3.125521000  |
| H  | -3.009593000 | -4.815530000 | 1.879948000  |
| H  | -2.230763000 | -3.506361000 | 2.789365000  |
| C  | -0.185016000 | 0.260153000  | 4.182266000  |
| C  | -0.105133000 | 0.966415000  | 3.056459000  |
| Cl | 0.423028000  | -0.189306000 | -0.385785000 |
| Cl | 1.309772000  | 1.795063000  | 2.515180000  |
| Cl | 1.109064000  | 0.017311000  | 5.304313000  |
| H  | -1.116944000 | -0.219971000 | 4.457631000  |
| C  | 5.506137000  | -4.090543000 | 4.712130000  |
| C  | 5.540877000  | -2.832983000 | 3.874032000  |
| C  | 6.573082000  | -2.622233000 | 2.936780000  |
| C  | 4.516663000  | -1.869210000 | 3.966105000  |
| C  | 6.575927000  | -1.487402000 | 2.112673000  |
| C  | 4.510043000  | -0.735680000 | 3.138890000  |
| C  | 5.542905000  | -0.541430000 | 2.209503000  |
| H  | 5.057677000  | -4.927836000 | 4.141963000  |
| H  | 4.904181000  | -3.953153000 | 5.625961000  |
| H  | 6.519842000  | -4.408724000 | 5.009756000  |
| H  | 7.385277000  | -3.354507000 | 2.856892000  |
| H  | 3.710995000  | -2.004304000 | 4.697657000  |
| H  | 7.395536000  | -1.332759000 | 1.401680000  |
| H  | 3.701359000  | -0.002507000 | 3.231242000  |
| H  | 5.556100000  | 0.348742000  | 1.574566000  |
| C  | -6.431696000 | 1.715893000  | 5.897969000  |
| C  | -5.484220000 | 1.253955000  | 4.817895000  |
| C  | -4.859556000 | -0.000816000 | 4.861256000  |
| C  | -5.166782000 | 2.090354000  | 3.732690000  |
| C  | -3.968021000 | -0.413373000 | 3.870267000  |
| C  | -4.283463000 | 1.700217000  | 2.737803000  |
| C  | -3.656340000 | 0.423023000  | 2.763043000  |
| O  | -2.857550000 | 0.011637000  | 1.799889000  |
| H  | -6.714897000 | 0.891404000  | 6.559411000  |



|   |              |              |              |
|---|--------------|--------------|--------------|
| H | -7.348428000 | 2.139803000  | 5.471539000  |
| H | -5.974168000 | 2.497337000  | 6.518575000  |
| H | -5.073875000 | -0.670771000 | 5.692283000  |
| H | -5.618785000 | 3.079684000  | 3.671228000  |
| H | -3.489143000 | -1.389695000 | 3.929622000  |
| H | -4.059854000 | 2.382796000  | 1.925758000  |
| H | -0.959749000 | 1.024676000  | 2.390052000  |
| C | -8.424881000 | 0.585419000  | -0.643867000 |
| C | -7.775603000 | 1.922442000  | -1.023701000 |
| C | -6.582286000 | 2.318187000  | -0.138811000 |
| N | -5.400995000 | 1.452118000  | -0.268159000 |
| C | -4.234209000 | 1.801477000  | -0.847506000 |
| N | -4.225145000 | 2.839063000  | -1.747171000 |
| N | -3.116744000 | 1.170572000  | -0.498868000 |
| H | -7.729845000 | -0.260771000 | -0.790318000 |
| H | -9.316059000 | 0.391773000  | -1.264210000 |
| H | -8.749947000 | 0.596003000  | 0.413370000  |
| H | -7.453488000 | 1.899611000  | -2.083503000 |
| H | -8.519829000 | 2.736808000  | -0.942464000 |
| H | -6.873241000 | 2.298284000  | 0.926895000  |
| H | -6.272971000 | 3.353839000  | -0.353445000 |
| H | -5.359629000 | 0.633849000  | 0.353118000  |
| H | -5.058110000 | 2.939919000  | -2.327973000 |
| H | -3.332209000 | 3.019078000  | -2.256137000 |
| H | -3.004758000 | 0.692103000  | 0.508260000  |
| H | -2.257986000 | 1.368748000  | -1.013786000 |
| C | 7.610757000  | 5.079008000  | 1.649422000  |
| C | 6.710669000  | 5.076578000  | 0.444612000  |
| C | 6.779021000  | 5.923558000  | -0.646865000 |
| C | 5.611642000  | 4.175676000  | 0.178539000  |
| N | 5.794262000  | 5.599634000  | -1.569664000 |
| C | 5.064527000  | 4.527321000  | -1.100442000 |
| C | 5.033816000  | 3.100492000  | 0.890690000  |
| C | 3.993488000  | 3.823547000  | -1.680493000 |
| C | 3.969513000  | 2.398768000  | 0.317610000  |
| C | 3.461624000  | 2.750718000  | -0.957023000 |
| H | 7.036606000  | 5.233146000  | 2.582019000  |
| H | 8.366092000  | 5.879011000  | 1.581295000  |
| H | 8.144561000  | 4.115859000  | 1.753049000  |
| H | 7.467870000  | 6.746646000  | -0.842742000 |
| H | 5.644237000  | 6.074234000  | -2.454623000 |
| H | 5.418099000  | 2.820972000  | 1.877718000  |
| H | 3.596653000  | 4.100372000  | -2.663644000 |
| H | 3.516875000  | 1.557662000  | 0.850107000  |
| H | 2.649836000  | 2.151268000  | -1.383475000 |
| C | 1.521902000  | 5.594694000  | 1.183934000  |
| C | 0.034225000  | 5.362917000  | 1.074362000  |
| C | -0.689489000 | 4.775489000  | 2.134932000  |
| C | -0.675798000 | 5.681565000  | -0.097499000 |
| C | -2.051302000 | 4.479655000  | 2.025475000  |
| C | -2.043316000 | 5.382651000  | -0.232368000 |
| C | -2.732600000 | 4.764606000  | 0.827570000  |
| O | -4.060373000 | 4.430740000  | 0.734932000  |
| H | 1.803501000  | 5.939844000  | 2.193507000  |
| H | 1.870733000  | 6.344395000  | 0.453959000  |
| H | 2.084163000  | 4.661165000  | 0.990135000  |
| H | -0.169803000 | 4.530196000  | 3.067142000  |
| H | -0.152843000 | 6.158578000  | -0.934426000 |
| H | -2.593301000 | 4.016250000  | 2.854415000  |
| H | -2.576595000 | 5.640942000  | -1.154513000 |
| H | -4.277588000 | 4.330811000  | -0.216563000 |

#### 4A. PceA/TBE, Co<sup>II</sup> (Charge = 2, Multiplicity = 2)

|    |              |              |              |
|----|--------------|--------------|--------------|
| Co | 0.565510000  | -2.281429000 | -1.446735000 |
| C  | -1.790319000 | -3.767958000 | -0.903352000 |
| C  | -3.353088000 | -3.587408000 | -1.024662000 |
| C  | -3.481647000 | -2.790673000 | -2.377342000 |
| C  | -2.138139000 | -2.103286000 | -2.501447000 |
| C  | -1.843937000 | -1.027887000 | -3.413077000 |
| C  | -0.535719000 | -0.682435000 | -3.677690000 |
| C  | 0.018332000  | 0.356995000  | -4.670518000 |
| C  | 1.317674000  | -0.394431000 | -5.112065000 |
| C  | 1.689048000  | -1.059970000 | -3.812136000 |
| C  | 2.981204000  | -1.352998000 | -3.410617000 |
| C  | 3.345339000  | -1.944218000 | -2.202984000 |
| C  | 4.780133000  | -2.041652000 | -1.723567000 |
| C  | 4.635498000  | -3.000373000 | -0.506021000 |
| C  | 3.147733000  | -2.957751000 | -0.204604000 |
| C  | 2.575693000  | -3.492199000 | 0.936051000  |
| C  | 1.158397000  | -3.694787000 | 1.041335000  |
| C  | 0.407180000  | -4.419101000 | 2.173100000  |
| C  | -0.959088000 | -4.725793000 | 1.466684000  |
| C  | -1.091595000 | -3.576899000 | 0.465550000  |
| C  | -1.280700000 | -5.055734000 | -1.576821000 |
| N  | -1.255609000 | -2.607165000 | -1.679025000 |
| N  | 0.572072000  | -1.313820000 | -3.087171000 |
| N  | 2.465240000  | -2.409505000 | -1.283968000 |
| N  | 0.320406000  | -3.255415000 | 0.129229000  |
| C  | -4.118752000 | -4.917791000 | -1.007518000 |
| C  | -3.870675000 | -2.676504000 | 0.109572000  |
| C  | -5.338167000 | -2.257808000 | 0.004844000  |
| O  | -6.091424000 | -2.547872000 | -0.912976000 |
| N  | -5.765377000 | -1.420236000 | 1.028904000  |
| C  | -3.843144000 | -3.611836000 | -3.629627000 |

|    |              |              |              |
|----|--------------|--------------|--------------|
| C  | -3.025728000 | -0.359124000 | -4.086751000 |
| C  | -0.843567000 | 0.780711000  | -5.863704000 |
| C  | 0.543854000  | 1.616791000  | -3.912920000 |
| C  | -0.395910000 | 2.354137000  | -2.971973000 |
| O  | -1.631106000 | 2.187600000  | -2.969445000 |
| N  | 0.205006000  | 3.218419000  | -2.138678000 |
| C  | 5.194632000  | -0.637851000 | -1.221336000 |
| C  | 5.762498000  | -2.501219000 | -2.811045000 |
| C  | 5.069885000  | -4.455742000 | -0.779013000 |
| C  | 3.483778000  | -3.936994000 | 2.062916000  |
| C  | 0.223166000  | -3.451134000 | 3.364178000  |
| C  | 1.035823000  | -5.740603000 | 2.647396000  |
| C  | -2.144324000 | -4.917798000 | 2.411466000  |
| C  | 1.095194000  | -1.450055000 | -6.211493000 |
| H  | -4.267670000 | -2.040863000 | -2.264959000 |
| H  | 2.087559000  | 0.314229000  | -5.437540000 |
| H  | 3.781772000  | -1.063172000 | -4.082403000 |
| H  | 5.213938000  | -2.612007000 | 0.339028000  |
| H  | -0.803869000 | -5.653131000 | 0.902133000  |
| H  | -1.512727000 | -2.688493000 | 0.954227000  |
| H  | -0.186905000 | -5.079181000 | -1.544241000 |
| H  | -1.587528000 | -5.092379000 | -2.623322000 |
| H  | -1.661340000 | -5.947915000 | -1.074972000 |
| H  | -3.809615000 | -5.581226000 | -1.816779000 |
| H  | -5.189551000 | -4.735956000 | -1.112633000 |
| H  | -3.953612000 | -5.444869000 | -0.061940000 |
| H  | -3.275211000 | -1.757921000 | 0.159463000  |
| H  | -3.743799000 | -3.165825000 | 1.082102000  |
| H  | -6.773959000 | -1.366095000 | 1.139345000  |
| H  | -5.240671000 | -1.374406000 | 1.898041000  |
| H  | -3.894823000 | -2.961080000 | -4.506437000 |
| H  | -4.824201000 | -4.074021000 | -3.497196000 |
| H  | -3.110344000 | -4.395431000 | -3.838743000 |
| H  | -3.212515000 | -0.760547000 | -5.088572000 |
| H  | -2.866508000 | 0.712882000  | -4.169272000 |
| H  | -3.934698000 | -0.514507000 | -3.501631000 |
| H  | -0.199266000 | 1.267372000  | -6.604943000 |
| H  | -1.610611000 | 1.498246000  | -5.570691000 |
| H  | -1.324587000 | -0.071807000 | -6.347036000 |
| H  | 0.879642000  | 2.339355000  | -4.669033000 |
| H  | 1.438317000  | 1.348666000  | -3.336770000 |
| H  | -0.354931000 | 3.746149000  | -1.474772000 |
| H  | 1.215020000  | 3.291385000  | -2.065992000 |
| H  | 2.010791000  | -2.028315000 | -6.363517000 |
| H  | 0.829807000  | -0.977373000 | -7.160910000 |
| H  | 0.295270000  | -2.142519000 | -5.928368000 |
| H  | 5.174403000  | 0.095716000  | -2.032242000 |
| H  | 6.209912000  | -0.681592000 | -0.814618000 |
| H  | 4.523710000  | -0.291013000 | -0.431006000 |
| H  | 5.832255000  | -1.751057000 | -3.605185000 |
| H  | 5.467409000  | -3.451000000 | -3.264016000 |
| H  | 6.764795000  | -2.614268000 | -2.386679000 |
| H  | 6.131335000  | -4.498326000 | -1.036188000 |
| H  | 4.494531000  | -4.889572000 | -1.603175000 |
| H  | 4.913534000  | -5.075917000 | 0.106120000  |
| H  | 4.438212000  | -3.411875000 | 2.025486000  |
| H  | 3.685835000  | -5.013179000 | 2.039581000  |
| H  | 3.044942000  | -3.707630000 | 3.036018000  |
| H  | 1.188188000  | -3.099479000 | 3.739774000  |
| H  | -0.286233000 | -3.959677000 | 4.188560000  |
| H  | -0.372283000 | -2.574485000 | 3.086794000  |
| H  | 1.392148000  | -6.337330000 | 1.801646000  |
| H  | 0.274168000  | -6.325888000 | 3.174164000  |
| H  | 1.863329000  | -5.589914000 | 3.342151000  |
| H  | -1.914518000 | -5.659590000 | 3.182890000  |
| H  | -3.022738000 | -5.280994000 | 1.870352000  |
| H  | -2.415213000 | -3.982920000 | 2.913847000  |
| C  | 0.926221000  | -0.079682000 | 2.346448000  |
| C  | 0.472322000  | 0.722799000  | 1.379477000  |
| Br | 0.536481000  | 0.134356000  | -0.443814000 |
| Br | -0.259548000 | 2.452633000  | 1.592667000  |
| Br | 0.831709000  | 0.340588000  | 4.174729000  |
| H  | 1.378974000  | -1.039330000 | 2.121470000  |
| C  | 5.325265000  | -3.147094000 | 5.362410000  |
| C  | 5.441016000  | -2.097843000 | 4.278665000  |
| C  | 6.528269000  | -2.114994000 | 3.378625000  |
| C  | 4.479270000  | -1.078803000 | 4.135872000  |
| C  | 6.655305000  | -1.139750000 | 2.379344000  |
| C  | 4.603008000  | -0.099872000 | 3.136258000  |
| C  | 5.694198000  | -0.122355000 | 2.256347000  |
| H  | 5.332084000  | -4.166024000 | 4.933656000  |
| H  | 4.398363000  | -3.025629000 | 5.946968000  |
| H  | 6.177466000  | -3.087502000 | 6.063097000  |
| H  | 7.291897000  | -2.895978000 | 3.472270000  |
| H  | 3.630237000  | -1.041013000 | 4.828502000  |
| H  | 7.519174000  | -1.162292000 | 1.705714000  |
| H  | 3.855944000  | 0.698705000  | 3.063277000  |
| H  | 5.803228000  | 0.656291000  | 1.494941000  |
| C  | -6.764112000 | 2.458538000  | 5.118434000  |
| C  | -5.696668000 | 1.792579000  | 4.282357000  |
| C  | -5.306561000 | 0.469243000  | 4.536599000  |
| C  | -5.037427000 | 2.485915000  | 3.257029000  |
| C  | -4.287619000 | -0.141866000 | 3.803194000  |
| C  | -4.026013000 | 1.885206000  | 2.506563000  |
| C  | -3.656633000 | 0.572458000  | 2.787301000  |

|   |              |              |              |
|---|--------------|--------------|--------------|
| O | -2.695892000 | -0.092929000 | 1.993956000  |
| H | -7.568053000 | 1.760164000  | 5.370056000  |
| H | -7.199330000 | 3.317090000  | 4.599577000  |
| H | -6.339833000 | 2.822060000  | 6.062248000  |
| H | -5.793200000 | -0.088784000 | 5.332807000  |
| H | -5.305381000 | 3.514651000  | 3.030809000  |
| H | -3.965059000 | -1.156011000 | 4.026646000  |
| H | -3.529170000 | 2.442122000  | 1.718603000  |
| H | -1.828377000 | 0.326908000  | 2.138468000  |
| C | -8.468993000 | 0.196355000  | -1.207832000 |
| C | -7.785747000 | 1.529732000  | -1.554128000 |
| C | -6.735649000 | 2.012546000  | -0.532704000 |
| N | -5.497335000 | 1.218975000  | -0.474358000 |
| C | -4.355297000 | 1.514171000  | -1.109322000 |
| N | -4.304563000 | 2.464424000  | -2.067338000 |
| N | -3.215229000 | 0.872267000  | -0.783009000 |
| H | -7.753165000 | -0.644831000 | -1.201698000 |
| H | -9.249522000 | -0.039317000 | -1.949548000 |
| H | -8.956632000 | 0.252832000  | -0.217091000 |
| H | -7.317329000 | 1.465029000  | -2.556167000 |
| H | -8.547764000 | 2.328283000  | -1.622209000 |
| H | -7.161076000 | 2.001241000  | 0.486305000  |
| H | -6.444460000 | 3.058243000  | -0.737037000 |
| H | -5.489018000 | 0.389017000  | 0.140229000  |
| H | -5.139344000 | 2.686972000  | -2.604038000 |
| H | -3.385448000 | 2.637102000  | -2.502358000 |
| H | -3.083588000 | 0.470420000  | 0.155650000  |
| H | -2.382540000 | 1.068636000  | -1.346218000 |
| C | 7.368418000  | 5.432681000  | 0.878230000  |
| C | 6.636662000  | 5.002779000  | -0.363390000 |
| C | 6.924937000  | 5.377625000  | -1.663620000 |
| C | 5.514824000  | 4.096061000  | -0.454808000 |
| N | 6.054596000  | 4.759733000  | -2.549670000 |
| C | 5.182802000  | 3.958818000  | -1.846841000 |
| C | 4.761785000  | 3.371715000  | 0.497566000  |
| C | 4.161129000  | 3.102162000  | -2.293561000 |
| C | 3.736722000  | 2.527208000  | 0.058931000  |
| C | 3.451744000  | 2.383018000  | -1.322710000 |
| H | 6.692732000  | 5.940775000  | 1.590878000  |
| H | 8.187362000  | 6.128476000  | 0.635130000  |
| H | 7.805585000  | 4.564622000  | 1.405373000  |
| H | 7.702595000  | 6.047619000  | -2.033130000 |
| H | 6.079550000  | 4.866374000  | -3.559662000 |
| H | 4.988237000  | 3.462489000  | 1.565385000  |
| H | 3.950512000  | 2.976668000  | -3.361869000 |
| H | 3.161463000  | 1.944280000  | 0.786232000  |
| H | 2.702940000  | 1.646360000  | -1.632082000 |
| C | 1.293963000  | 5.701979000  | 0.111258000  |
| C | -0.199168000 | 5.647424000  | 0.354415000  |
| C | -0.721492000 | 5.427375000  | 1.651125000  |
| C | -1.126971000 | 5.748250000  | -0.700947000 |
| C | -2.091103000 | 5.228948000  | 1.872695000  |
| C | -2.502913000 | 5.546039000  | -0.499305000 |
| C | -2.986764000 | 5.257293000  | 0.786694000  |
| O | -4.307905000 | 4.993111000  | 1.043531000  |
| H | 1.800428000  | 6.361470000  | 0.836951000  |
| H | 1.526893000  | 6.070756000  | -0.901390000 |
| H | 1.751901000  | 4.699457000  | 0.220479000  |
| H | -0.039715000 | 5.412528000  | 2.509040000  |
| H | -0.773875000 | 5.993960000  | -1.709413000 |
| H | -2.481154000 | 5.058834000  | 2.880638000  |
| H | -3.197333000 | 5.617661000  | -1.344904000 |
| H | -4.838913000 | 5.218060000  | 0.258158000  |

#### 4B. PceA/TBE, Co<sup>I</sup> (Charge = 1, Multiplicity = 1)

|    |              |              |              |
|----|--------------|--------------|--------------|
| Co | 0.508003000  | -2.467660000 | -1.341659000 |
| C  | -1.767986000 | -3.938808000 | -0.509657000 |
| C  | -3.332509000 | -3.748939000 | -0.490704000 |
| C  | -3.592451000 | -3.076020000 | -1.885070000 |
| C  | -2.267917000 | -2.403068000 | -2.184157000 |
| C  | -2.071414000 | -1.406433000 | -3.195836000 |
| C  | -0.793861000 | -1.054257000 | -3.585189000 |
| C  | -0.382141000 | -0.096954000 | -4.722399000 |
| C  | 0.976584000  | -0.738979000 | -5.124621000 |
| C  | 1.436649000  | -1.262575000 | -3.789990000 |
| C  | 2.762480000  | -1.446457000 | -3.446061000 |
| C  | 3.220637000  | -1.981544000 | -2.249155000 |
| C  | 4.686684000  | -2.008037000 | -1.857889000 |
| C  | 4.656208000  | -2.962731000 | -0.634085000 |
| C  | 3.188955000  | -2.969173000 | -0.237571000 |
| C  | 2.724313000  | -3.493703000 | 0.951828000  |
| C  | 1.329174000  | -3.722022000 | 1.164796000  |
| C  | 0.667341000  | -4.290815000 | 2.429781000  |
| C  | -0.745921000 | -4.673124000 | 1.873743000  |
| C  | -0.946158000 | -3.643180000 | 0.761486000  |
| C  | -1.332214000 | -5.287155000 | -1.112029000 |
| N  | -1.296294000 | -2.848795000 | -1.421476000 |
| N  | 0.372284000  | -1.554279000 | -2.996152000 |
| N  | 2.409985000  | -2.470749000 | -1.277106000 |
| N  | 0.427965000  | -3.395869000 | 0.262594000  |
| C  | -4.094864000 | -5.063316000 | -0.268415000 |
| C  | -3.728282000 | -2.733597000 | 0.602918000  |
| C  | -5.192894000 | -2.299393000 | 0.615546000  |
| O  | -6.062526000 | -2.684601000 | -0.153335000 |

|    |              |              |              |
|----|--------------|--------------|--------------|
| N  | -5.487756000 | -1.331879000 | 1.573217000  |
| C  | -4.064453000 | -4.005351000 | -3.019172000 |
| C  | -3.314172000 | -0.824243000 | -3.843112000 |
| C  | -1.317087000 | 0.079425000  | -5.925477000 |
| C  | -0.003805000 | 1.293600000  | -4.108511000 |
| C  | -1.057705000 | 1.928190000  | -3.232412000 |
| O  | -2.172026000 | 2.280156000  | -3.671999000 |
| N  | -0.732101000 | 2.085925000  | -1.933782000 |
| C  | 5.084632000  | -0.589443000 | -1.391836000 |
| C  | 5.618517000  | -2.439234000 | -3.000615000 |
| C  | 5.115780000  | -4.405840000 | -0.925449000 |
| C  | 3.723237000  | -3.863629000 | 2.028275000  |
| C  | 0.577530000  | -3.155895000 | 3.476469000  |
| C  | 1.323141000  | -5.540490000 | 3.041495000  |
| C  | -1.848726000 | -4.735962000 | 2.930255000  |
| C  | 0.855177000  | -1.895774000 | -6.134615000 |
| H  | -4.371963000 | -2.319164000 | -1.766673000 |
| H  | 1.660553000  | 0.019937000  | -5.523796000 |
| H  | 3.506223000  | -1.130818000 | -4.170378000 |
| H  | 5.277958000  | -2.550429000 | 0.167557000  |
| H  | -0.636791000 | -5.664040000 | 1.414852000  |
| H  | -1.294423000 | -2.692727000 | 1.186374000  |
| H  | -0.242136000 | -5.304402000 | -1.196250000 |
| H  | -1.749929000 | -5.422649000 | -2.111269000 |
| H  | -1.650777000 | -6.125605000 | -0.487090000 |
| H  | -3.876852000 | -5.799671000 | -1.043823000 |
| H  | -5.170959000 | -4.880917000 | -0.266182000 |
| H  | -3.819045000 | -5.504660000 | 0.695213000  |
| H  | -3.115942000 | -1.828234000 | 0.523194000  |
| H  | -3.512802000 | -3.142989000 | 1.596494000  |
| H  | -6.471378000 | -1.265886000 | 1.818200000  |
| H  | -4.847045000 | -1.181394000 | 2.347438000  |
| H  | -4.184448000 | -3.437088000 | -3.945596000 |
| H  | -5.033610000 | -4.444014000 | -2.767257000 |
| H  | -3.353780000 | -4.812180000 | -3.215873000 |
| H  | -3.590722000 | -1.347246000 | -4.765755000 |
| H  | -3.183159000 | 0.228095000  | -4.086957000 |
| H  | -4.167450000 | -0.900588000 | -3.164178000 |
| H  | -0.742436000 | 0.510592000  | -6.753721000 |
| H  | -2.138680000 | 0.762746000  | -5.711334000 |
| H  | -1.725174000 | -0.877004000 | -6.261096000 |
| H  | 0.191912000  | 1.988807000  | -4.933532000 |
| H  | 0.921694000  | 1.182903000  | -3.534354000 |
| H  | -1.259370000 | 2.737433000  | -1.359151000 |
| H  | 0.169394000  | 1.801832000  | -1.570315000 |
| H  | 1.829325000  | -2.376009000 | -6.265282000 |
| H  | 0.515459000  | -1.538238000 | -7.111013000 |
| H  | 0.149457000  | -2.650927000 | -5.772049000 |
| H  | 4.989121000  | 0.132768000  | -2.207349000 |
| H  | 6.124484000  | -0.592553000 | -1.047461000 |
| H  | 4.450144000  | -0.252905000 | -0.567930000 |
| H  | 5.609169000  | -1.693054000 | -3.802038000 |
| H  | 5.330892000  | -3.402465000 | -3.430537000 |
| H  | 6.650029000  | -2.512438000 | -2.640116000 |
| H  | 6.165687000  | -4.429508000 | -1.231657000 |
| H  | 4.510767000  | -4.855669000 | -1.719540000 |
| H  | 5.010438000  | -5.025350000 | -0.031449000 |
| H  | 4.670881000  | -3.345759000 | 1.881108000  |
| H  | 3.925462000  | -4.940496000 | 2.063365000  |
| H  | 3.363576000  | -3.566356000 | 3.015899000  |
| H  | 1.576192000  | -2.788495000 | 3.730747000  |
| H  | 0.109653000  | -3.515146000 | 4.398950000  |
| H  | -0.005319000 | -2.310292000 | 3.094934000  |
| H  | 1.604446000  | -6.258513000 | 2.264196000  |
| H  | 0.605834000  | -6.030240000 | 3.710281000  |
| H  | 2.208337000  | -5.306179000 | 3.635171000  |
| H  | -1.556005000 | -5.382310000 | 3.764535000  |
| H  | -2.773034000 | -5.148260000 | 2.514682000  |
| H  | -2.070167000 | -3.743486000 | 3.338034000  |
| C  | 1.021419000  | 0.690115000  | 2.914339000  |
| C  | 0.429836000  | 1.069216000  | 1.783967000  |
| Br | 0.374681000  | -0.426113000 | 0.207829000  |
| Br | -0.198750000 | 2.824054000  | 1.437091000  |
| Br | 1.348106000  | 1.777190000  | 4.453401000  |
| H  | 1.406197000  | -0.315956000 | 3.034159000  |
| C  | 5.628889000  | -2.635759000 | 5.255219000  |
| C  | 5.671538000  | -1.657161000 | 4.102840000  |
| C  | 6.692490000  | -1.740995000 | 3.132604000  |
| C  | 4.717793000  | -0.628840000 | 3.976915000  |
| C  | 6.765554000  | -0.818340000 | 2.079834000  |
| C  | 4.789284000  | 0.297678000  | 2.924711000  |
| C  | 5.815567000  | 0.210602000  | 1.974388000  |
| H  | 5.717760000  | -3.678575000 | 4.900375000  |
| H  | 4.690708000  | -2.545880000 | 5.828066000  |
| H  | 6.467156000  | -2.458971000 | 5.954337000  |
| H  | 7.444792000  | -2.535034000 | 3.210929000  |
| H  | 3.916692000  | -0.538408000 | 4.720987000  |
| H  | 7.574232000  | -0.895162000 | 1.344231000  |
| H  | 4.044857000  | 1.097112000  | 2.858325000  |
| H  | 5.873468000  | 0.942440000  | 1.162934000  |
| C  | -6.430150000 | 3.036489000  | 5.050317000  |
| C  | -5.366711000 | 2.288182000  | 4.280966000  |
| C  | -4.884933000 | 1.054537000  | 4.740526000  |
| C  | -4.809499000 | 2.813449000  | 3.106220000  |
| C  | -3.895695000 | 0.357987000  | 4.044887000  |

|   |              |              |              |
|---|--------------|--------------|--------------|
| C | -3.820771000 | 2.129030000  | 2.399552000  |
| C | -3.377775000 | 0.892364000  | 2.866031000  |
| O | -2.519390000 | 0.096828000  | 2.091549000  |
| H | -7.137839000 | 2.348628000  | 5.523344000  |
| H | -6.989287000 | 3.715289000  | 4.399507000  |
| H | -5.978348000 | 3.641134000  | 5.846468000  |
| H | -5.286584000 | 0.630433000  | 5.657868000  |
| H | -5.153805000 | 3.769951000  | 2.719546000  |
| H | -3.519882000 | -0.595685000 | 4.407637000  |
| H | -3.403160000 | 2.558132000  | 1.494976000  |
| H | -1.586669000 | 0.408210000  | 2.139202000  |
| C | -8.488556000 | 0.116075000  | -0.889390000 |
| C | -7.791451000 | 1.423575000  | -1.289780000 |
| C | -6.700593000 | 1.898260000  | -0.309320000 |
| N | -5.485363000 | 1.070689000  | -0.270343000 |
| C | -4.383660000 | 1.279209000  | -1.005332000 |
| N | -4.418740000 | 2.125485000  | -2.069965000 |
| N | -3.232297000 | 0.683281000  | -0.658378000 |
| H | -7.776308000 | -0.726837000 | -0.828548000 |
| H | -9.265464000 | -0.152772000 | -1.624107000 |
| H | -8.980212000 | 0.222474000  | 0.095028000  |
| H | -7.357444000 | 1.321762000  | -2.304740000 |
| H | -8.535508000 | 2.238942000  | -1.358037000 |
| H | -7.096356000 | 1.912168000  | 0.720827000  |
| H | -6.398387000 | 2.934952000  | -0.536842000 |
| H | -5.424530000 | 0.330241000  | 0.448247000  |
| H | -5.294639000 | 2.172926000  | -2.590392000 |
| H | -3.550347000 | 2.227006000  | -2.655737000 |
| H | -3.044811000 | 0.389976000  | 0.316517000  |
| H | -2.410883000 | 0.735938000  | -1.265005000 |
| C | 7.462959000  | 5.382145000  | -0.244389000 |
| C | 6.529317000  | 4.737561000  | -1.234523000 |
| C | 6.626790000  | 4.797085000  | -2.612884000 |
| C | 5.365495000  | 3.921924000  | -0.954885000 |
| N | 5.601464000  | 4.070763000  | -3.201563000 |
| C | 4.811296000  | 3.516279000  | -2.215643000 |
| C | 4.732989000  | 3.482384000  | 0.231156000  |
| C | 3.682000000  | 2.683423000  | -2.310716000 |
| C | 3.607667000  | 2.656432000  | 0.140565000  |
| C | 3.095095000  | 2.252514000  | -1.116555000 |
| H | 6.927059000  | 6.090975000  | 0.414083000  |
| H | 8.264165000  | 5.937558000  | -0.758805000 |
| H | 7.938050000  | 4.627789000  | 0.410195000  |
| H | 7.364751000  | 5.309576000  | -3.231933000 |
| H | 5.462403000  | 3.961703000  | -4.201239000 |
| H | 5.123800000  | 3.779306000  | 1.210423000  |
| H | 3.292349000  | 2.363790000  | -3.283822000 |
| H | 3.111356000  | 2.305887000  | 1.050270000  |
| H | 2.253098000  | 1.551374000  | -1.141454000 |
| C | 1.356844000  | 5.629971000  | -0.708212000 |
| C | -0.149017000 | 5.558021000  | -0.622158000 |
| C | -0.829897000 | 5.723228000  | 0.605757000  |
| C | -0.924123000 | 5.213593000  | -1.743330000 |
| C | -2.193902000 | 5.428545000  | 0.741520000  |
| C | -2.293900000 | 4.927070000  | -1.631675000 |
| C | -2.918347000 | 4.967354000  | -0.371852000 |
| O | -4.218044000 | 4.558861000  | -0.190900000 |
| H | 1.772672000  | 6.378391000  | -0.012277000 |
| H | 1.696183000  | 5.879386000  | -1.727609000 |
| H | 1.803640000  | 4.653385000  | -0.443381000 |
| H | -0.269292000 | 6.047315000  | 1.489716000  |
| H | -0.446666000 | 5.130210000  | -2.726212000 |
| H | -2.694628000 | 5.513305000  | 1.710656000  |
| H | -2.865872000 | 4.649030000  | -2.523058000 |
| H | -4.475612000 | 4.053449000  | -0.989592000 |

#### 4C. PceA/TBE, Co<sup>I</sup> → Co<sup>III</sup> Transition State (Charge = 1, Multiplicity = 1)

|    |              |              |              |
|----|--------------|--------------|--------------|
| Co | -0.575686000 | -2.561256000 | 1.099065000  |
| C  | 1.706959000  | -4.136609000 | 0.434340000  |
| C  | 3.268830000  | -3.934907000 | 0.484638000  |
| C  | 3.466862000  | -3.265410000 | 1.891409000  |
| C  | 2.127200000  | -2.602121000 | 2.139441000  |
| C  | 1.885912000  | -1.604125000 | 3.146731000  |
| C  | 0.597888000  | -1.220442000 | 3.456552000  |
| C  | 0.128642000  | -0.244922000 | 4.554694000  |
| C  | -1.269417000 | -0.856284000 | 4.867937000  |
| C  | -1.644046000 | -1.397662000 | 3.514956000  |
| C  | -2.946937000 | -1.597481000 | 3.095606000  |
| C  | -3.335123000 | -2.102997000 | 1.862088000  |
| C  | -4.781280000 | -2.342750000 | 1.490985000  |
| C  | -4.672675000 | -2.537198000 | -0.050214000 |
| C  | -3.196257000 | -2.849295000 | -0.253062000 |
| C  | -2.639050000 | -3.333124000 | -1.420043000 |
| C  | -1.261954000 | -3.718373000 | -1.482175000 |
| C  | -0.532597000 | -4.344195000 | -2.682873000 |
| C  | 0.763388000  | -4.879390000 | -1.983270000 |
| C  | 0.963574000  | -3.840306000 | -0.880216000 |
| C  | 1.236661000  | -5.480260000 | 1.017089000  |
| N  | 1.200052000  | -3.045681000 | 1.329035000  |
| N  | -0.537823000 | -1.703459000 | 2.796063000  |
| N  | -2.479581000 | -2.513803000 | 0.896006000  |
| N  | -0.429019000 | -3.514057000 | -0.486859000 |
| C  | 4.054351000  | -5.240938000 | 0.303031000  |
| C  | 3.689594000  | -2.912339000 | -0.594129000 |

|    |              |              |              |
|----|--------------|--------------|--------------|
| C  | 5.152194000  | -2.473656000 | -0.575228000 |
| O  | 6.006973000  | -2.876051000 | 0.205409000  |
| N  | 5.450157000  | -1.512020000 | -1.522409000 |
| C  | 3.901072000  | -4.194903000 | 3.040073000  |
| C  | 3.094309000  | -1.055676000 | 3.878670000  |
| C  | 0.979165000  | -0.082344000 | 5.820208000  |
| C  | -0.178637000 | 1.144007000  | 3.902912000  |
| C  | 0.961209000  | 1.797366000  | 3.148818000  |
| O  | 2.062456000  | 2.041920000  | 3.684199000  |
| N  | 0.705769000  | 2.109062000  | 1.869095000  |
| C  | -5.729882000 | -1.189499000 | 1.846434000  |
| C  | -5.221562000 | -3.631713000 | 2.230695000  |
| C  | -5.717800000 | -3.513116000 | -0.610424000 |
| C  | -3.492466000 | -3.401653000 | -2.668218000 |
| C  | -0.184652000 | -3.223789000 | -3.693156000 |
| C  | -1.264483000 | -5.506850000 | -3.372085000 |
| C  | 1.949191000  | -5.108838000 | -2.917818000 |
| C  | -1.253025000 | -1.994660000 | 5.906592000  |
| H  | 4.238706000  | -2.495903000 | 1.802337000  |
| H  | -1.965867000 | -0.076566000 | 5.198011000  |
| H  | -3.734215000 | -1.329374000 | 3.792823000  |
| H  | -4.847145000 | -1.554945000 | -0.515649000 |
| H  | 0.489682000  | -5.833016000 | -1.513205000 |
| H  | 1.370192000  | -2.914901000 | -1.305554000 |
| H  | 0.142819000  | -5.496338000 | 1.046659000  |
| H  | 1.606481000  | -5.617882000 | 2.034826000  |
| H  | 1.581516000  | -6.318506000 | 0.406308000  |
| H  | 3.788486000  | -5.987547000 | 1.053847000  |
| H  | 5.125044000  | -5.045054000 | 0.378447000  |
| H  | 3.856701000  | -5.673883000 | -0.682503000 |
| H  | 3.075776000  | -2.004792000 | -0.534326000 |
| H  | 3.508586000  | -3.328251000 | -1.591843000 |
| H  | 6.428230000  | -1.407791000 | -1.769479000 |
| H  | 4.775153000  | -1.271432000 | -2.241863000 |
| H  | 3.983681000  | -3.631896000 | 3.973344000  |
| H  | 4.881606000  | -4.624344000 | 2.820249000  |
| H  | 3.190674000  | -5.009372000 | 3.205264000  |
| H  | 3.286219000  | -1.591030000 | 4.815534000  |
| H  | 2.969348000  | -0.001608000 | 4.115902000  |
| H  | 3.989792000  | -1.150432000 | 3.261202000  |
| H  | 0.358963000  | 0.376525000  | 6.598921000  |
| H  | 1.831855000  | 0.575068000  | 5.655839000  |
| H  | 1.332521000  | -1.046106000 | 6.194863000  |
| H  | -0.468668000 | 1.833887000  | 4.705211000  |
| H  | -1.038060000 | 1.041820000  | 3.232073000  |
| H  | 1.338522000  | 2.704680000  | 1.345191000  |
| H  | -0.170659000 | 1.875740000  | 1.418944000  |
| H  | -2.245300000 | -2.450577000 | 5.974232000  |
| H  | -0.981179000 | -1.620619000 | 6.897416000  |
| H  | -0.539456000 | -2.773877000 | 5.618322000  |
| H  | -5.820508000 | -1.062459000 | 2.931258000  |
| H  | -6.731090000 | -1.408836000 | 1.459772000  |
| H  | -5.393368000 | -0.248594000 | 1.404630000  |
| H  | -5.140805000 | -3.480909000 | 3.312034000  |
| H  | -4.590788000 | -4.483921000 | 1.957741000  |
| H  | -6.261818000 | -3.878074000 | 1.999814000  |
| H  | -6.687955000 | -3.298555000 | -0.150534000 |
| H  | -5.460127000 | -4.554779000 | -0.397494000 |
| H  | -5.853141000 | -3.397072000 | -1.684279000 |
| H  | -4.219718000 | -2.588322000 | -2.674208000 |
| H  | -4.031252000 | -4.350239000 | -2.769204000 |
| H  | -2.881582000 | -3.275608000 | -3.561588000 |
| H  | -1.087530000 | -2.752538000 | -4.088586000 |
| H  | 0.371112000  | -3.640093000 | -4.539121000 |
| H  | 0.421278000  | -2.439753000 | -3.226420000 |
| H  | -1.666983000 | -6.209122000 | -2.634574000 |
| H  | -0.556424000 | -6.051212000 | -4.006779000 |
| H  | -2.081754000 | -5.172664000 | -4.013082000 |
| H  | 1.666214000  | -5.752794000 | -3.757001000 |
| H  | 2.769999000  | -5.605342000 | -2.393888000 |
| H  | 2.328495000  | -4.168728000 | -3.330569000 |
| C  | -0.468239000 | 0.948772000  | -3.074449000 |
| C  | 0.337196000  | 1.255840000  | -2.053537000 |
| Br | -0.127555000 | -0.601926000 | -0.219845000 |
| Br | 0.444878000  | 3.042332000  | -1.382789000 |
| Br | -1.547357000 | 2.136739000  | -4.120283000 |
| H  | -0.561998000 | -0.073941000 | -3.421820000 |
| C  | -5.974032000 | -1.618152000 | -5.204792000 |
| C  | -5.900180000 | -0.846232000 | -3.903206000 |
| C  | -6.957980000 | -0.878626000 | -2.971611000 |
| C  | -4.780265000 | -0.041484000 | -3.605327000 |
| C  | -6.909485000 | -0.114562000 | -1.793828000 |
| C  | -4.725269000 | 0.717808000  | -2.428635000 |
| C  | -5.794924000 | 0.693678000  | -1.519900000 |
| H  | -6.659172000 | -2.479525000 | -5.128708000 |
| H  | -4.979957000 | -1.989542000 | -5.509742000 |
| H  | -6.344954000 | -0.970429000 | -6.021301000 |
| H  | -7.837116000 | -1.500756000 | -3.177568000 |
| H  | -3.940288000 | 0.001510000  | -4.308757000 |
| H  | -7.750093000 | -0.146169000 | -1.091445000 |
| H  | -3.849533000 | 1.338842000  | -2.223441000 |
| H  | -5.752669000 | 1.307443000  | -0.613826000 |
| C  | 6.283174000  | 3.597066000  | -4.759342000 |
| C  | 5.364494000  | 2.681786000  | -3.989222000 |
| C  | 4.980708000  | 1.437681000  | -4.505081000 |

|   |              |              |              |
|---|--------------|--------------|--------------|
| C | 4.825465000  | 3.075928000  | -2.755785000 |
| C | 4.083396000  | 0.616134000  | -3.821876000 |
| C | 3.934548000  | 2.262447000  | -2.062135000 |
| C | 3.557997000  | 1.018232000  | -2.587840000 |
| O | 2.717875000  | 0.175083000  | -1.900093000 |
| H | 6.934738000  | 3.035547000  | -5.436295000 |
| H | 6.913685000  | 4.188685000  | -4.087565000 |
| H | 5.706105000  | 4.303481000  | -5.369779000 |
| H | 5.374818000  | 1.113246000  | -5.465918000 |
| H | 5.090255000  | 4.040360000  | -2.327662000 |
| H | 3.761514000  | -0.332818000 | -4.246372000 |
| H | 3.512018000  | 2.602561000  | -1.122638000 |
| H | 1.636885000  | 0.580624000  | -1.919695000 |
| C | 8.482519000  | -0.212838000 | 0.597248000  |
| C | 7.899982000  | 1.062459000  | 1.226552000  |
| C | 6.718191000  | 1.673264000  | 0.449009000  |
| N | 5.511434000  | 0.841163000  | 0.414975000  |
| C | 4.408344000  | 1.022437000  | 1.161989000  |
| N | 4.437638000  | 1.798124000  | 2.264476000  |
| N | 3.267699000  | 0.422063000  | 0.779696000  |
| H | 7.742428000  | -1.032707000 | 0.575547000  |
| H | 9.354587000  | -0.566775000 | 1.171861000  |
| H | 8.820359000  | -0.018477000 | -0.437809000 |
| H | 7.583124000  | 0.856276000  | 2.268032000  |
| H | 8.683192000  | 1.841216000  | 1.288835000  |
| H | 7.005054000  | 1.858863000  | -0.601592000 |
| H | 6.436229000  | 2.654868000  | 0.869635000  |
| H | 5.428784000  | 0.145138000  | -0.339876000 |
| H | 5.321710000  | 1.955142000  | 2.741133000  |
| H | 3.556810000  | 1.973670000  | 2.798423000  |
| H | 3.067895000  | 0.263634000  | -0.243801000 |
| H | 2.441468000  | 0.491486000  | 1.372167000  |
| C | -7.277616000 | 5.571573000  | 1.466370000  |
| C | -6.449538000 | 4.374664000  | 1.860199000  |
| C | -6.664544000 | 3.552470000  | 2.951558000  |
| C | -5.276009000 | 3.846540000  | 1.191741000  |
| N | -5.698731000 | 2.555262000  | 3.003169000  |
| C | -4.828896000 | 2.708032000  | 1.941355000  |
| C | -4.556948000 | 4.207646000  | 0.028113000  |
| C | -3.707981000 | 1.945195000  | 1.563225000  |
| C | -3.444916000 | 3.450783000  | -0.354445000 |
| C | -3.025309000 | 2.328036000  | 0.402659000  |
| H | -6.668890000 | 6.494690000  | 1.454647000  |
| H | -8.112281000 | 5.723720000  | 2.170038000  |
| H | -7.703572000 | 5.450379000  | 0.453105000  |
| H | -7.446298000 | 3.601809000  | 3.711106000  |
| H | -5.641988000 | 1.830910000  | 3.711779000  |
| H | -4.873015000 | 5.068410000  | -0.570850000 |
| H | -3.392043000 | 1.069182000  | 2.140613000  |
| H | -2.884963000 | 3.718182000  | -1.256234000 |
| H | -2.172762000 | 1.733943000  | 0.053478000  |
| C | -1.152346000 | 5.564735000  | 1.672176000  |
| C | 0.316886000  | 5.571846000  | 1.311702000  |
| C | 0.753959000  | 5.917552000  | 0.014257000  |
| C | 1.298657000  | 5.162397000  | 2.233076000  |
| C | 2.094923000  | 5.798167000  | -0.372252000 |
| C | 2.646498000  | 5.028000000  | 1.863166000  |
| C | 3.044556000  | 5.321634000  | 0.547325000  |
| O | 4.337867000  | 5.157014000  | 0.111707000  |
| H | -1.708016000 | 6.350775000  | 1.133627000  |
| H | -1.304511000 | 5.714177000  | 2.754774000  |
| H | -1.617445000 | 4.599576000  | 1.396728000  |
| H | 0.022763000  | 6.271035000  | -0.721430000 |
| H | 1.010512000  | 4.915136000  | 3.260900000  |
| H | 2.415175000  | 6.050643000  | -1.387021000 |
| H | 3.383899000  | 4.687734000  | 2.599719000  |
| H | 4.892461000  | 4.912950000  | 0.873915000  |

#### 4D. PceA/TBE, Co<sup>III</sup> (Charge = 1, Multiplicity = 1)

|    |              |              |              |
|----|--------------|--------------|--------------|
| Co | 0.463728000  | -2.414674000 | -1.297323000 |
| C  | -1.879629000 | -3.979682000 | -0.863746000 |
| C  | -3.433226000 | -3.766457000 | -1.022532000 |
| C  | -3.525775000 | -3.001150000 | -2.390816000 |
| C  | -2.175183000 | -2.322994000 | -2.484607000 |
| C  | -1.858840000 | -1.231681000 | -3.369356000 |
| C  | -0.545976000 | -0.875082000 | -3.589864000 |
| C  | 0.015353000  | 0.206511000  | -4.529941000 |
| C  | 1.395134000  | -0.437323000 | -4.876226000 |
| C  | 1.686393000  | -1.170168000 | -3.594415000 |
| C  | 2.958942000  | -1.482949000 | -3.143518000 |
| C  | 3.268479000  | -2.082759000 | -1.929933000 |
| C  | 4.682238000  | -2.411606000 | -1.506723000 |
| C  | 4.495481000  | -2.650747000 | 0.022123000  |
| C  | 2.998228000  | -2.896963000 | 0.149528000  |
| C  | 2.359994000  | -3.387458000 | 1.272077000  |
| C  | 0.962488000  | -3.707071000 | 1.255049000  |
| C  | 0.145425000  | -4.355478000 | 2.384437000  |
| C  | -1.123330000 | -4.822280000 | 1.588886000  |
| C  | -1.230958000 | -3.738909000 | 0.515215000  |
| C  | -1.368794000 | -5.296567000 | -1.471227000 |
| N  | -1.305497000 | -2.848798000 | -1.662663000 |
| N  | 0.540382000  | -1.496607000 | -2.960106000 |
| N  | 2.353314000  | -2.490821000 | -1.017842000 |
| N  | 0.192144000  | -3.424260000 | 0.231761000  |

|    |              |              |              |
|----|--------------|--------------|--------------|
| C  | -4.233821000 | -5.074194000 | -0.985855000 |
| C  | -3.922942000 | -2.803589000 | 0.074475000  |
| C  | -5.386627000 | -2.356930000 | 0.004317000  |
| O  | -6.202754000 | -2.723446000 | -0.837859000 |
| N  | -5.699104000 | -1.478261000 | 1.006401000  |
| C  | -3.846827000 | -3.840947000 | -3.641467000 |
| C  | -3.020262000 | -0.551011000 | -4.062896000 |
| C  | -0.772294000 | 0.581565000  | -5.791061000 |
| C  | 0.364344000  | 1.470016000  | -3.676825000 |
| C  | -0.774763000 | 2.136906000  | -2.927320000 |
| O  | -1.869925000 | 2.390551000  | -3.468780000 |
| N  | -0.514137000 | 2.463765000  | -1.653639000 |
| C  | 5.699971000  | -1.296418000 | -1.784277000 |
| C  | 5.088623000  | -3.696860000 | -2.271999000 |
| C  | 5.468120000  | -3.692586000 | 0.593834000  |
| C  | 3.141920000  | -3.546501000 | 2.555865000  |
| C  | -0.222806000 | -3.258227000 | 3.413197000  |
| C  | 0.800367000  | -5.565768000 | 3.069149000  |
| C  | -2.369764000 | -5.041222000 | 2.444137000  |
| C  | 1.368753000  | -1.423316000 | -6.059487000 |
| H  | -4.316616000 | -2.251039000 | -2.306818000 |
| H  | 2.143089000  | 0.340589000  | -5.069356000 |
| H  | 3.789424000  | -1.205145000 | -3.784327000 |
| H  | 4.693672000  | -1.693091000 | 0.527720000  |
| H  | -0.851658000 | -5.767919000 | 1.101294000  |
| H  | -1.656103000 | -2.824348000 | 0.943664000  |
| H  | -0.276140000 | -5.325916000 | -1.414129000 |
| H  | -1.657437000 | -5.380475000 | -2.520541000 |
| H  | -1.769668000 | -6.158492000 | -0.932429000 |
| H  | -3.919843000 | -5.772663000 | -1.764678000 |
| H  | -5.294909000 | -4.859019000 | -1.121960000 |
| H  | -4.109885000 | -5.573060000 | -0.019124000 |
| H  | -3.307624000 | -1.896272000 | 0.092737000  |
| H  | -3.797764000 | -3.262910000 | 1.060054000  |
| H  | -6.674683000 | -1.315939000 | 1.222160000  |
| H  | -4.963571000 | -1.180436000 | 1.657417000  |
| H  | -3.866201000 | -3.204244000 | -4.530602000 |
| H  | -4.833136000 | -4.298947000 | -3.535110000 |
| H  | -3.109448000 | -4.630345000 | -3.811598000 |
| H  | -3.199410000 | -0.962994000 | -5.062658000 |
| H  | -2.846774000 | 0.518527000  | -4.161313000 |
| H  | -3.936741000 | -0.686801000 | -3.485152000 |
| H  | -0.099127000 | 1.108785000  | -6.477192000 |
| H  | -1.600580000 | 1.251991000  | -5.569016000 |
| H  | -1.153232000 | -0.303716000 | -6.306273000 |
| H  | 0.780192000  | 2.227660000  | -4.354216000 |
| H  | 1.150890000  | 1.210174000  | -2.961400000 |
| H  | -1.142817000 | 3.070236000  | -1.134096000 |
| H  | 0.361321000  | 2.216629000  | -1.212224000 |
| H  | 2.340039000  | -1.918639000 | -6.152648000 |
| H  | 1.158563000  | -0.905452000 | -6.999012000 |
| H  | 0.607293000  | -2.195457000 | -5.906916000 |
| H  | 5.845234000  | -1.143011000 | -2.859765000 |
| H  | 6.671098000  | -1.574441000 | -1.360755000 |
| H  | 5.388009000  | -0.353134000 | -1.330224000 |
| H  | 5.064202000  | -3.506112000 | -3.349780000 |
| H  | 4.405607000  | -4.525041000 | -2.056942000 |
| H  | 6.103916000  | -4.002937000 | -2.004857000 |
| H  | 6.466527000  | -3.507477000 | 0.184561000  |
| H  | 5.175269000  | -4.714042000 | 0.333765000  |
| H  | 5.559542000  | -3.617422000 | 1.676084000  |
| H  | 3.909607000  | -2.774908000 | 2.630184000  |
| H  | 3.623310000  | -4.526641000 | 2.644499000  |
| H  | 2.490105000  | -3.421241000 | 3.419822000  |
| H  | 0.671630000  | -2.816812000 | 3.858985000  |
| H  | -0.821953000 | -3.690629000 | 4.220713000  |
| H  | -0.790561000 | -2.445979000 | 2.948584000  |
| H  | 1.254747000  | -6.237650000 | 2.333482000  |
| H  | 0.033158000  | -6.128542000 | 3.612033000  |
| H  | 1.563130000  | -5.280534000 | 3.795891000  |
| H  | -2.159167000 | -5.728730000 | 3.269984000  |
| H  | -3.177705000 | -5.483039000 | 1.854473000  |
| H  | -2.735311000 | -4.102868000 | 2.872250000  |
| C  | -0.192976000 | 0.465292000  | 4.335198000  |
| C  | -0.573751000 | 0.925156000  | 3.148783000  |
| Br | 0.080801000  | -0.444964000 | -0.071482000 |
| Br | 0.245220000  | 2.358895000  | 2.225656000  |
| Br | 1.255695000  | 1.094813000  | 5.369758000  |
| H  | -0.736045000 | -0.346419000 | 4.806302000  |
| C  | 5.810762000  | -1.988216000 | 5.105080000  |
| C  | 5.719923000  | -1.134988000 | 3.856688000  |
| C  | 6.786606000  | -1.066854000 | 2.937840000  |
| C  | 4.571352000  | -0.355800000 | 3.598511000  |
| C  | 6.719194000  | -0.229883000 | 1.812092000  |
| C  | 4.496930000  | 0.476114000  | 2.472390000  |
| C  | 5.576809000  | 0.551001000  | 1.577460000  |
| H  | 4.854245000  | -2.497541000 | 5.317714000  |
| H  | 6.048449000  | -1.363737000 | 5.986736000  |
| H  | 6.599428000  | -2.754458000 | 5.017963000  |
| H  | 7.687388000  | -1.666649000 | 3.114287000  |
| H  | 3.724516000  | -0.393159000 | 4.293464000  |
| H  | 7.566654000  | -0.181516000 | 1.119156000  |
| H  | 3.595886000  | 1.072593000  | 2.297050000  |
| H  | 5.523862000  | 1.217877000  | 0.711239000  |
| C  | -6.062788000 | 4.045836000  | 4.615090000  |



|   |              |              |              |
|---|--------------|--------------|--------------|
| C | -5.338117000 | 2.952111000  | 3.875600000  |
| C | -5.467849000 | 1.605439000  | 4.251924000  |
| C | -4.477239000 | 3.247666000  | 2.806738000  |
| C | -4.784762000 | 0.595211000  | 3.585253000  |
| C | -3.779484000 | 2.252707000  | 2.138152000  |
| C | -3.932762000 | 0.885594000  | 2.487468000  |
| O | -3.344259000 | -0.086016000 | 1.801369000  |
| H | -7.022741000 | 3.696215000  | 5.009865000  |
| H | -6.251240000 | 4.908020000  | 3.966873000  |
| H | -5.472406000 | 4.404866000  | 5.469126000  |
| H | -6.118705000 | 1.347392000  | 5.085681000  |
| H | -4.364303000 | 4.277009000  | 2.474641000  |
| H | -4.893194000 | -0.442065000 | 3.897800000  |
| H | -3.120200000 | 2.517948000  | 1.318014000  |
| H | -1.417076000 | 0.495618000  | 2.610814000  |
| C | -8.424816000 | 0.522709000  | -0.867013000 |
| C | -7.776617000 | 1.873100000  | -1.193076000 |
| C | -6.572507000 | 2.205224000  | -0.298190000 |
| N | -5.463512000 | 1.251385000  | -0.414482000 |
| C | -4.308360000 | 1.455022000  | -1.067072000 |
| N | -4.240528000 | 2.428773000  | -2.028646000 |
| N | -3.243025000 | 0.730671000  | -0.718684000 |
| H | -7.726418000 | -0.317268000 | -1.033404000 |
| H | -9.310835000 | 0.346443000  | -1.499618000 |
| H | -8.756636000 | 0.492669000  | 0.187586000  |
| H | -7.462547000 | 1.893252000  | -2.255746000 |
| H | -8.513631000 | 2.688638000  | -1.072288000 |
| H | -6.869413000 | 2.211054000  | 0.765472000  |
| H | -6.185107000 | 3.214697000  | -0.513388000 |
| H | -5.477547000 | 0.424064000  | 0.197203000  |
| H | -5.080098000 | 2.552866000  | -2.595795000 |
| H | -3.343604000 | 2.501954000  | -2.564949000 |
| H | -3.189982000 | 0.349465000  | 0.302259000  |
| H | -2.372619000 | 0.813400000  | -1.243132000 |
| C | 7.697749000  | 5.257383000  | -1.362868000 |
| C | 6.785008000  | 4.150164000  | -1.821309000 |
| C | 6.963424000  | 3.349870000  | -2.934943000 |
| C | 5.557824000  | 3.694709000  | -1.198282000 |
| N | 5.926725000  | 2.431357000  | -3.041318000 |
| C | 5.046368000  | 2.616001000  | -1.994026000 |
| C | 4.840206000  | 4.073187000  | -0.039407000 |
| C | 3.869000000  | 1.923188000  | -1.659603000 |
| C | 3.671829000  | 3.383187000  | 0.299932000  |
| C | 3.192828000  | 2.314218000  | -0.497905000 |
| H | 7.166916000  | 6.226645000  | -1.324385000 |
| H | 8.558126000  | 5.368361000  | -2.042744000 |
| H | 8.088701000  | 5.060519000  | -0.347388000 |
| H | 7.765848000  | 3.362872000  | -3.674078000 |
| H | 5.832787000  | 1.737758000  | -3.776252000 |
| H | 5.204104000  | 4.890124000  | 0.592617000  |
| H | 3.508162000  | 1.086557000  | -2.266815000 |
| H | 3.123775000  | 3.657909000  | 1.207380000  |
| H | 2.309503000  | 1.751067000  | -0.174696000 |
| C | 1.589826000  | 5.665850000  | -1.656868000 |
| C | 0.142317000  | 5.545316000  | -1.251569000 |
| C | -0.221934000 | 5.330323000  | 0.093305000  |
| C | -0.885677000 | 5.550538000  | -2.214445000 |
| C | -1.547470000 | 5.064449000  | 0.463198000  |
| C | -2.216916000 | 5.293121000  | -1.863697000 |
| C | -2.550113000 | 5.015362000  | -0.523147000 |
| O | -3.828134000 | 4.694596000  | -0.142588000 |
| H | 2.201826000  | 6.121855000  | -0.861015000 |
| H | 1.706289000  | 6.270523000  | -2.572558000 |
| H | 2.025672000  | 4.667956000  | -1.855919000 |
| H | 0.553260000  | 5.343343000  | 0.868243000  |
| H | -0.640243000 | 5.732215000  | -3.266781000 |
| H | -1.813440000 | 4.866780000  | 1.505329000  |
| H | -2.998988000 | 5.289429000  | -2.630213000 |
| H | -4.230876000 | 4.190555000  | -0.882260000 |

### 5A. NpRdhA/DBMP with neutralized R552, Co<sup>II</sup> (Charge = 1, Multiplicity = 2)

|    |               |              |              |
|----|---------------|--------------|--------------|
| C  | 3.032077000   | 7.671627000  | -1.417080000 |
| C  | 6.307168000   | 4.575109000  | 2.035657000  |
| C  | -6.524037000  | -2.159147000 | 3.366956000  |
| C  | -10.145216000 | 2.458704000  | 0.637244000  |
| C  | -0.083840000  | 5.248630000  | 3.277189000  |
| C  | -4.490884000  | -2.214045000 | -5.220015000 |
| Co | 1.721874000   | -2.818189000 | 0.335838000  |
| C  | -1.226236000  | 2.387838000  | -0.211288000 |
| C  | -0.933204000  | 1.471682000  | -1.251803000 |
| C  | -1.457243000  | 1.548098000  | -2.540254000 |
| C  | -2.372984000  | 2.552548000  | -2.871907000 |
| C  | -2.722315000  | 3.468653000  | -1.870233000 |
| C  | -2.164999000  | 3.384134000  | -0.601315000 |
| O  | -0.699735000  | 2.313149000  | 0.979487000  |
| Br | 0.247495000   | 0.006686000  | -0.834549000 |
| Br | -2.647641000  | 4.683063000  | 0.714896000  |
| C  | -3.014307000  | 2.608553000  | -4.237200000 |
| H  | -2.428853000  | 2.047771000  | -4.972272000 |
| H  | -4.021887000  | 2.175162000  | -4.207805000 |
| H  | -3.107872000  | 3.639923000  | -4.591182000 |
| H  | -1.183483000  | 0.795358000  | -3.273258000 |
| H  | -3.440722000  | 4.254475000  | -2.082660000 |
| C  | -4.455535000  | -2.111348000 | -3.709635000 |

|   |               |              |              |
|---|---------------|--------------|--------------|
| C | -3.687095000  | -1.122789000 | -3.066427000 |
| C | -3.666110000  | -1.011837000 | -1.667629000 |
| C | -4.423865000  | -1.886636000 | -0.877147000 |
| C | -5.181395000  | -2.890908000 | -1.504033000 |
| C | -5.195499000  | -3.002533000 | -2.902924000 |
| H | -5.527298000  | -2.166257000 | -5.599350000 |
| H | -4.065219000  | -3.175044000 | -5.565304000 |
| H | -3.917563000  | -1.399233000 | -5.693173000 |
| H | -3.112968000  | -0.416750000 | -3.676143000 |
| H | -3.074377000  | -0.224274000 | -1.191003000 |
| H | -4.437490000  | -1.752294000 | 0.211375000  |
| H | -5.782507000  | -3.578143000 | -0.897566000 |
| H | -5.802896000  | -3.781509000 | -3.379302000 |
| C | 2.686613000   | 6.252097000  | -1.805230000 |
| C | 3.678332000   | 5.367468000  | -2.254816000 |
| C | 3.375422000   | 4.067564000  | -2.651271000 |
| C | 2.052457000   | 3.620762000  | -2.605644000 |
| C | 1.045957000   | 4.477434000  | -2.154317000 |
| C | 1.371410000   | 5.776224000  | -1.758044000 |
| O | 1.797586000   | 2.324559000  | -3.003468000 |
| H | 0.841375000   | 2.160906000  | -2.895673000 |
| H | 3.365040000   | 8.247632000  | -2.288699000 |
| H | 3.843734000   | 7.696031000  | -0.680365000 |
| H | 2.167756000   | 8.185663000  | -0.986742000 |
| H | 4.712205000   | 5.703086000  | -2.300792000 |
| H | 4.153632000   | 3.396113000  | -2.999144000 |
| H | 0.014811000   | 4.135255000  | -2.114489000 |
| H | 0.574798000   | 6.431118000  | -1.412071000 |
| C | 4.891160000   | 4.695209000  | 1.465706000  |
| C | 4.110224000   | 3.384578000  | 1.619421000  |
| C | 2.685599000   | 3.476658000  | 1.085275000  |
| N | 1.969520000   | 2.179267000  | 1.294234000  |
| H | 2.049751000   | 1.872176000  | 2.307258000  |
| H | 0.921753000   | 2.231258000  | 1.078910000  |
| H | 2.364718000   | 1.427172000  | 0.715161000  |
| H | 6.872545000   | 3.783996000  | 1.511470000  |
| H | 6.282114000   | 4.319313000  | 3.110742000  |
| H | 6.866896000   | 5.520642000  | 1.929112000  |
| H | 4.934542000   | 4.967145000  | 0.394244000  |
| H | 4.343661000   | 5.513168000  | 1.973734000  |
| H | 4.652723000   | 2.583040000  | 1.083920000  |
| H | 4.073212000   | 3.098369000  | 2.688158000  |
| H | 2.657392000   | 3.716104000  | 0.010229000  |
| H | 2.095377000   | 4.229758000  | 1.626583000  |
| C | -6.526286000  | -0.935333000 | 2.444945000  |
| C | -5.333854000  | 0.006078000  | 2.665650000  |
| N | -4.065176000  | -0.619683000 | 2.298159000  |
| C | -3.003001000  | 0.114233000  | 2.337387000  |
| N | -2.924339000  | 1.444895000  | 2.752549000  |
| N | -1.741520000  | -0.441239000 | 2.058479000  |
| H | -2.183406000  | 1.987992000  | 2.288570000  |
| H | -3.817116000  | 1.938094000  | 2.753814000  |
| H | -1.817795000  | -1.309008000 | 1.528713000  |
| H | -1.096667000  | 0.220610000  | 1.611935000  |
| H | -7.381301000  | -2.823835000 | 3.158948000  |
| H | -6.580787000  | -1.856829000 | 4.429129000  |
| H | -5.593983000  | -2.740593000 | 3.234155000  |
| H | -7.454759000  | -0.352002000 | 2.590439000  |
| H | -6.528757000  | -1.253118000 | 1.385694000  |
| H | -5.512148000  | 0.927187000  | 2.067384000  |
| H | -5.319060000  | 0.321077000  | 3.734457000  |
| C | -8.702849000  | 2.203327000  | 0.241901000  |
| C | -8.340587000  | 1.033577000  | -0.459336000 |
| C | -7.016198000  | 0.805914000  | -0.860762000 |
| C | -6.018747000  | 1.748419000  | -0.565986000 |
| C | -6.359845000  | 2.915133000  | 0.134962000  |
| C | -7.687576000  | 3.136608000  | 0.534721000  |
| H | -10.722675000 | 2.847017000  | -0.223080000 |
| H | -10.216524000 | 3.202095000  | 1.448756000  |
| H | -10.640834000 | 1.530720000  | 0.971609000  |
| H | -9.110154000  | 0.287623000  | -0.691856000 |
| H | -6.755142000  | -0.113142000 | -1.396593000 |
| H | -4.982322000  | 1.566507000  | -0.868883000 |
| H | -5.587553000  | 3.654643000  | 0.375676000  |
| H | -7.941466000  | 4.051512000  | 1.083420000  |
| O | 0.090619000   | 3.872178000  | 2.966112000  |
| H | 0.251332000   | 5.900289000  | 2.446046000  |
| H | 0.533090000   | 5.466062000  | 4.164490000  |
| H | -1.137936000  | 5.493953000  | 3.511454000  |
| H | -0.428430000  | 3.607842000  | 2.159699000  |
| C | 1.082750000   | -3.948873000 | -4.869423000 |
| C | 1.256306000   | -2.815100000 | -3.843790000 |
| C | 0.547772000   | -1.529637000 | -4.328997000 |
| C | 2.787161000   | -2.568612000 | -3.602101000 |
| C | 3.467684000   | -1.686852000 | -4.648002000 |
| C | 2.808917000   | -2.036926000 | -2.168492000 |
| C | 4.015036000   | -2.235422000 | -1.222317000 |
| C | 5.174272000   | -1.170453000 | -1.220716000 |
| C | 5.484794000   | -1.019354000 | 0.312838000  |
| C | 4.176131000   | -1.415389000 | 0.965695000  |
| C | 3.825254000   | -1.149262000 | 2.335555000  |
| C | 4.745436000   | -0.223450000 | 3.106896000  |
| C | 6.673855000   | -1.829971000 | 0.865370000  |
| C | 4.647497000   | 0.199843000  | -1.746679000 |
| C | 5.708199000   | 1.294889000  | -1.718171000 |

|   |              |              |              |
|---|--------------|--------------|--------------|
| N | 6.202155000  | 1.665696000  | -2.933022000 |
| O | 6.106022000  | 1.811512000  | -0.674359000 |
| C | 6.397132000  | -1.587441000 | -2.046866000 |
| C | 4.515715000  | -3.688474000 | -1.308668000 |
| N | 3.389602000  | -2.040353000 | 0.121919000  |
| N | 1.683321000  | -2.766411000 | -1.529035000 |
| C | 0.791029000  | -3.153836000 | -2.416402000 |
| C | -0.431527000 | -3.796802000 | -2.041263000 |
| C | -1.472197000 | -4.121397000 | -3.093974000 |
| C | -0.682802000 | -4.151765000 | -0.729303000 |
| N | 0.091349000  | -3.813933000 | 0.374009000  |
| C | -1.804703000 | -5.086862000 | -0.307981000 |
| C | -1.519232000 | -6.508762000 | -0.833879000 |
| C | -1.820051000 | -4.957597000 | 1.242789000  |
| C | -2.017591000 | -6.273952000 | 2.011507000  |
| C | -2.920873000 | -3.957272000 | 1.668885000  |
| C | -0.473896000 | -4.311073000 | 1.504259000  |
| C | 0.067242000  | -4.164832000 | 2.774357000  |
| C | 1.152791000  | -3.367380000 | 3.097091000  |
| N | 1.888130000  | -2.650526000 | 2.213707000  |
| C | 1.660876000  | -3.145202000 | 4.493796000  |
| C | 2.738786000  | -4.188730000 | 4.844458000  |
| C | 2.193846000  | -1.682836000 | 4.356406000  |
| C | 2.720058000  | -1.755029000 | 2.904977000  |
| C | 3.170368000  | -1.318697000 | 5.479022000  |
| C | 0.907390000  | -0.804571000 | 4.447068000  |
| C | 1.044931000  | 0.676353000  | 4.150160000  |
| O | 2.137568000  | 1.183098000  | 3.810283000  |
| N | -0.070274000 | 1.408074000  | 4.254806000  |
| H | 1.373301000  | -4.915002000 | -4.443859000 |
| H | 1.729790000  | -3.750891000 | -5.731538000 |
| H | 0.060641000  | -4.025969000 | -5.243606000 |
| H | -0.538380000 | -1.650995000 | -4.307214000 |
| H | 0.842015000  | -1.302421000 | -5.358554000 |
| H | 0.800993000  | -0.673583000 | -3.697107000 |
| H | 3.262403000  | -3.557847000 | -3.606193000 |
| H | 4.551717000  | -1.671520000 | -4.499305000 |
| H | 3.100557000  | -0.656181000 | -4.607369000 |
| H | 3.287613000  | -2.068865000 | -5.658208000 |
| H | 5.701772000  | 0.034672000  | 0.508611000  |
| H | 4.171366000  | 0.445082000  | 3.743298000  |
| H | 5.327910000  | 0.396006000  | 2.422745000  |
| H | 5.455625000  | -0.779452000 | 3.729384000  |
| H | 6.771205000  | -1.660060000 | 1.940637000  |
| H | 7.605179000  | -1.506008000 | 0.393235000  |
| H | 6.558627000  | -2.905630000 | 0.706825000  |
| H | 3.812100000  | 0.542225000  | -1.126600000 |
| H | 4.266058000  | 0.083750000  | -2.763372000 |
| H | 5.881310000  | 1.254919000  | -3.797396000 |
| H | 6.921121000  | 2.377036000  | -2.970051000 |
| H | 6.817249000  | -2.537163000 | -1.711362000 |
| H | 7.185259000  | -0.832263000 | -1.969878000 |
| H | 6.137263000  | -1.688769000 | -3.105635000 |
| H | 3.666450000  | -4.371459000 | -1.200197000 |
| H | 5.227943000  | -3.906295000 | -0.510942000 |
| H | 4.997310000  | -3.889302000 | -2.269250000 |
| H | -2.467411000 | -4.183520000 | -2.650657000 |
| H | -1.269607000 | -5.062908000 | -3.616885000 |
| H | -1.523438000 | -3.332622000 | -3.845565000 |
| H | -2.762927000 | -4.746704000 | -0.715204000 |
| H | -2.300981000 | -7.204584000 | -0.517023000 |
| H | -0.556086000 | -6.877640000 | -0.466312000 |
| H | -1.487654000 | -6.514709000 | -1.925438000 |
| H | -2.059820000 | -6.081362000 | 3.088137000  |
| H | -1.214999000 | -6.992287000 | 1.824433000  |
| H | -2.970414000 | -6.731815000 | 1.728585000  |
| H | -2.865219000 | -3.033853000 | 1.090126000  |
| H | -2.842761000 | -3.699107000 | 2.728291000  |
| H | -3.908067000 | -4.396508000 | 1.489149000  |
| H | -0.449450000 | -4.646758000 | 3.596887000  |
| H | 0.851660000  | -3.197034000 | 5.229794000  |
| H | 2.318368000  | -5.196796000 | 4.781237000  |
| H | 3.110890000  | -4.037410000 | 5.861350000  |
| H | 3.583716000  | -4.124714000 | 4.150247000  |
| H | 2.715442000  | -1.595094000 | 6.437622000  |
| H | 3.373101000  | -0.248378000 | 5.503607000  |
| H | 4.116891000  | -1.856577000 | 5.389715000  |
| H | 0.503482000  | -0.917064000 | 5.461688000  |
| H | 0.129396000  | -1.184558000 | 3.768531000  |
| H | -0.041424000 | 2.396041000  | 3.951933000  |
| H | -0.981665000 | 0.968355000  | 4.327120000  |
| H | 2.536355000  | -0.974138000 | -2.162083000 |

### 5B. NpRdhA/DBMP with neutralized R552, Co<sup>I</sup> (Charge = 0, Multiplicity = 1)

|    |               |              |              |
|----|---------------|--------------|--------------|
| C  | 3.049661000   | 7.685182000  | -1.683509000 |
| C  | 6.323233000   | 4.510081000  | 1.698554000  |
| C  | -6.640384000  | -1.896372000 | 3.331152000  |
| C  | -10.205012000 | 2.809020000  | 0.677444000  |
| C  | -0.018779000  | 5.346281000  | 3.084093000  |
| C  | -4.805143000  | -2.010768000 | -5.299651000 |
| Co | 1.514942000   | -2.766596000 | 0.114633000  |
| C  | -0.959755000  | 2.471564000  | -0.449104000 |
| C  | -0.631073000  | 1.414439000  | -1.335693000 |
| C  | -1.003016000  | 1.382470000  | -2.676323000 |

|    |               |              |              |
|----|---------------|--------------|--------------|
| C  | -1.757416000  | 2.419300000  | -3.234183000 |
| C  | -2.137370000  | 3.471333000  | -2.387730000 |
| C  | -1.751428000  | 3.486789000  | -1.053817000 |
| O  | -0.589281000  | 2.498152000  | 0.803982000  |
| Br | 0.323435000   | -0.157465000 | -0.613430000 |
| Br | -2.295266000  | 4.950444000  | 0.054878000  |
| C  | -2.184130000  | 2.394560000  | -4.683246000 |
| H  | -1.707609000  | 1.565552000  | -5.215934000 |
| H  | -3.270746000  | 2.272381000  | -4.775163000 |
| H  | -1.913608000  | 3.324627000  | -5.196348000 |
| H  | -0.719005000  | 0.525530000  | -3.280716000 |
| H  | -2.738925000  | 4.289884000  | -2.772652000 |
| C  | -4.820413000  | -1.785540000 | -3.800101000 |
| C  | -4.019725000  | -0.784031000 | -3.209757000 |
| C  | -4.077091000  | -0.525562000 | -1.832437000 |
| C  | -4.939117000  | -1.270321000 | -1.012158000 |
| C  | -5.722958000  | -2.284326000 | -1.580039000 |
| C  | -5.661216000  | -2.540226000 | -2.959193000 |
| H  | -5.260304000  | -2.979147000 | -5.567876000 |
| H  | -3.775283000  | -1.992212000 | -5.700070000 |
| H  | -5.372082000  | -1.217362000 | -5.822309000 |
| H  | -3.348774000  | -0.189644000 | -3.840007000 |
| H  | -3.450987000  | 0.258912000  | -1.395327000 |
| H  | -4.993448000  | -1.059626000 | 0.059155000  |
| H  | -6.390606000  | -2.877784000 | -0.945605000 |
| H  | -6.283489000  | -3.332359000 | -3.392887000 |
| C  | 2.946713000   | 6.179680000  | -1.753839000 |
| C  | 4.083440000   | 5.365306000  | -1.654439000 |
| C  | 3.996243000   | 3.975630000  | -1.717529000 |
| C  | 2.747291000   | 3.372664000  | -1.879104000 |
| C  | 1.604360000   | 4.161763000  | -2.019527000 |
| C  | 1.711655000   | 5.549003000  | -1.944183000 |
| O  | 2.690260000   | 1.992819000  | -1.860124000 |
| H  | 1.753398000   | 1.716158000  | -1.908320000 |
| H  | 3.279395000   | 8.114049000  | -2.667770000 |
| H  | 3.843950000   | 7.998440000  | -0.997338000 |
| H  | 2.109404000   | 8.129585000  | -1.342407000 |
| H  | 5.059433000   | 5.823931000  | -1.508285000 |
| H  | 4.882169000   | 3.355813000  | -1.616495000 |
| H  | 0.635135000   | 3.695677000  | -2.167263000 |
| H  | 0.806538000   | 6.146605000  | -2.026239000 |
| C  | 4.803261000   | 4.544520000  | 1.907074000  |
| C  | 4.127719000   | 3.180483000  | 1.689008000  |
| C  | 2.606504000   | 3.302499000  | 1.680183000  |
| N  | 1.922481000   | 1.991141000  | 1.470462000  |
| H  | 1.872772000   | 1.443127000  | 2.368004000  |
| H  | 0.890781000   | 2.135095000  | 1.163017000  |
| H  | 2.370030000   | 1.424489000  | 0.737499000  |
| H  | 6.566905000   | 4.213757000  | 0.661902000  |
| H  | 6.805528000   | 3.774960000  | 2.365871000  |
| H  | 6.773586000   | 5.500554000  | 1.886750000  |
| H  | 4.354960000   | 5.276227000  | 1.207432000  |
| H  | 4.568654000   | 4.906152000  | 2.926845000  |
| H  | 4.456060000   | 2.765401000  | 0.719591000  |
| H  | 4.453869000   | 2.462054000  | 2.464112000  |
| H  | 2.278233000   | 3.973961000  | 0.869214000  |
| H  | 2.213052000   | 3.694790000  | 2.629050000  |
| C  | -5.412127000  | -2.054916000 | 4.240359000  |
| C  | -4.066642000  | -1.876075000 | 3.510902000  |
| N  | -3.830801000  | -0.486838000 | 3.149303000  |
| C  | -3.098739000  | -0.222720000 | 2.106014000  |
| N  | -2.442865000  | -1.150413000 | 1.317301000  |
| N  | -3.003868000  | 1.087358000  | 1.647400000  |
| H  | -1.813839000  | -0.824284000 | 0.583834000  |
| H  | -2.180853000  | -2.052192000 | 1.713460000  |
| H  | -3.508821000  | 1.737489000  | 2.249146000  |
| H  | -2.066571000  | 1.441742000  | 1.400507000  |
| H  | -7.580503000  | -2.010073000 | 3.899631000  |
| H  | -6.636648000  | -2.655006000 | 2.525459000  |
| H  | -6.647181000  | -0.902778000 | 2.851100000  |
| H  | -5.426066000  | -3.059151000 | 4.707620000  |
| H  | -5.455659000  | -1.316919000 | 5.063420000  |
| H  | -3.254542000  | -2.237298000 | 4.182633000  |
| H  | -4.055011000  | -2.556801000 | 2.628474000  |
| C  | -8.717526000  | 2.578540000  | 0.485602000  |
| C  | -8.057748000  | 3.060168000  | -0.664068000 |
| C  | -6.677615000  | 2.879837000  | -0.836282000 |
| C  | -5.924226000  | 2.211366000  | 0.140240000  |
| C  | -6.565653000  | 1.722270000  | 1.288535000  |
| C  | -7.948080000  | 1.904259000  | 1.455574000  |
| H  | -10.398395000 | 3.819499000  | 1.086400000  |
| H  | -10.639253000 | 2.078694000  | 1.381509000  |
| H  | -10.750868000 | 2.733586000  | -0.279418000 |
| H  | -8.636956000  | 3.582052000  | -1.436088000 |
| H  | -6.186032000  | 3.258566000  | -1.739848000 |
| H  | -4.847406000  | 2.060440000  | 0.014300000  |
| H  | -5.984973000  | 1.189635000  | 2.051392000  |
| H  | -8.439284000  | 1.511248000  | 2.354440000  |
| O  | -0.267650000  | 3.951488000  | 3.002839000  |
| H  | 0.771908000   | 5.672716000  | 2.376787000  |
| H  | 0.323030000   | 5.564407000  | 4.110249000  |
| H  | -0.927585000  | 5.948135000  | 2.881540000  |
| H  | -0.556122000  | 3.685352000  | 2.086003000  |
| C  | 2.228034000   | -3.176522000 | -5.173098000 |
| C  | 2.244242000   | -2.219204000 | -3.968408000 |

|   |              |              |              |
|---|--------------|--------------|--------------|
| C | 1.895232000  | -0.779352000 | -4.410067000 |
| C | 3.660271000  | -2.261126000 | -3.296161000 |
| C | 4.719761000  | -1.385877000 | -3.966033000 |
| C | 3.331039000  | -1.920384000 | -1.843894000 |
| C | 4.195343000  | -2.400516000 | -0.660070000 |
| C | 5.423775000  | -1.532155000 | -0.197475000 |
| C | 5.314626000  | -1.609719000 | 1.364349000  |
| C | 3.831975000  | -1.838730000 | 1.574409000  |
| C | 3.137300000  | -1.622980000 | 2.806922000  |
| C | 3.891108000  | -0.900690000 | 3.907411000  |
| C | 6.177613000  | -2.669539000 | 2.076218000  |
| C | 5.208402000  | -0.045092000 | -0.605498000 |
| C | 6.367349000  | 0.869673000  | -0.225338000 |
| N | 6.971022000  | 1.496224000  | -1.282441000 |
| O | 6.741150000  | 1.067052000  | 0.928893000  |
| C | 6.777074000  | -2.008210000 | -0.738263000 |
| C | 4.536686000  | -3.890622000 | -0.835760000 |
| N | 3.234699000  | -2.263007000 | 0.476241000  |
| N | 2.004234000  | -2.551117000 | -1.637562000 |
| C | 1.357486000  | -2.656741000 | -2.787239000 |
| C | -0.009981000 | -3.067335000 | -2.840435000 |
| C | -0.783914000 | -2.927030000 | -4.137866000 |
| C | -0.673454000 | -3.517248000 | -1.712226000 |
| N | -0.152165000 | -3.500128000 | -0.418472000 |
| C | -2.118004000 | -4.016609000 | -1.665239000 |
| C | -2.675600000 | -4.859532000 | -2.820953000 |
| C | -2.166702000 | -4.766504000 | -0.301457000 |
| C | -1.785417000 | -6.260864000 | -0.439645000 |
| C | -3.539210000 | -4.635488000 | 0.368251000  |
| C | -1.038743000 | -4.078085000 | 0.436276000  |
| C | -0.907550000 | -4.076909000 | 1.818716000  |
| C | 0.094266000  | -3.427407000 | 2.525775000  |
| N | 1.143805000  | -2.776225000 | 1.963124000  |
| C | 0.176058000  | -3.365721000 | 4.027773000  |
| C | 0.937485000  | -4.586215000 | 4.577640000  |
| C | 0.924998000  | -2.007944000 | 4.205267000  |
| C | 1.841453000  | -2.077035000 | 2.962342000  |
| C | 1.553006000  | -1.873248000 | 5.595980000  |
| C | -0.184174000 | -0.935989000 | 4.009029000  |
| C | 0.204442000  | 0.529956000  | 4.033061000  |
| O | 1.384162000  | 0.916712000  | 3.906732000  |
| N | -0.821700000 | 1.389447000  | 4.161760000  |
| H | 2.328904000  | -4.215550000 | -4.842156000 |
| H | 3.070482000  | -2.944491000 | -5.836326000 |
| H | 1.314722000  | -3.093514000 | -5.766267000 |
| H | 0.862347000  | -0.709917000 | -4.759277000 |
| H | 2.543261000  | -0.461318000 | -5.234234000 |
| H | 2.015668000  | -0.070674000 | -3.585494000 |
| H | 3.989650000  | -3.307458000 | -3.334369000 |
| H | 5.707159000  | -1.563975000 | -3.528795000 |
| H | 4.486835000  | -0.320831000 | -3.860052000 |
| H | 4.794480000  | -1.607744000 | -5.036675000 |
| H | 5.622729000  | -0.640995000 | 1.765903000  |
| H | 3.243081000  | -0.187252000 | 4.412446000  |
| H | 4.730815000  | -0.338958000 | 3.491191000  |
| H | 4.302475000  | -1.591841000 | 4.653318000  |
| H | 5.997801000  | -2.619359000 | 3.154230000  |
| H | 7.242294000  | -2.479568000 | 1.907129000  |
| H | 5.947212000  | -3.687762000 | 1.750083000  |
| H | 4.309285000  | 0.338259000  | -0.111253000 |
| H | 5.030619000  | 0.031957000  | -1.679715000 |
| H | 6.723793000  | 1.290864000  | -2.239400000 |
| H | 7.775781000  | 2.081859000  | -1.100972000 |
| H | 6.980067000  | -3.048230000 | -0.475820000 |
| H | 7.585972000  | -1.397009000 | -0.323814000 |
| H | 6.818978000  | -1.923498000 | -1.829254000 |
| H | 3.614511000  | -4.438207000 | -1.051199000 |
| H | 4.968179000  | -4.303329000 | 0.077946000  |
| H | 5.244405000  | -4.044586000 | -1.656029000 |
| H | -1.791189000 | -2.553852000 | -3.935635000 |
| H | -0.874447000 | -3.866778000 | -4.694579000 |
| H | -0.309704000 | -2.204665000 | -4.800923000 |
| H | -2.753503000 | -3.123014000 | -1.558169000 |
| H | -3.580080000 | -5.375324000 | -2.479736000 |
| H | -1.959661000 | -5.615178000 | -3.159142000 |
| H | -2.971377000 | -4.250612000 | -3.674629000 |
| H | -1.674439000 | -6.702711000 | 0.556099000  |
| H | -0.834775000 | -6.374704000 | -0.971449000 |
| H | -2.557969000 | -6.821161000 | -0.977095000 |
| H | -3.792120000 | -3.584725000 | 0.532880000  |
| H | -3.569480000 | -5.161881000 | 1.328784000  |
| H | -4.313812000 | -5.074186000 | -0.271679000 |
| H | -1.667771000 | -4.592298000 | 2.398159000  |
| H | -0.818035000 | -3.322989000 | 4.488945000  |
| H | 0.419557000  | -5.506450000 | 4.289448000  |
| H | 1.002253000  | -4.557138000 | 5.670126000  |
| H | 1.952550000  | -4.623645000 | 4.167149000  |
| H | 0.796635000  | -2.128877000 | 6.348619000  |
| H | 1.885316000  | -0.853377000 | 5.792597000  |
| H | 2.401962000  | -2.548041000 | 5.728922000  |
| H | -0.970555000 | -1.104449000 | 4.755955000  |
| H | -0.657697000 | -1.098472000 | 3.032967000  |
| H | -0.661084000 | 2.385821000  | 3.964301000  |
| H | -1.773438000 | 1.033954000  | 4.141491000  |
| H | 3.173781000  | -0.838760000 | -1.739378000 |

## 6A. NpRdhA/TCE, Co<sup>I</sup>

|    |               |              |              |
|----|---------------|--------------|--------------|
| C  | 4.269647000   | 7.450288000  | -1.481652000 |
| C  | 6.961186000   | 3.759508000  | 1.889917000  |
| C  | -6.890955000  | -0.406400000 | 3.472000000  |
| C  | -9.616953000  | 4.838883000  | 0.835781000  |
| C  | 0.843893000   | 5.633808000  | 3.270004000  |
| C  | -5.081174000  | -0.785702000 | -5.156324000 |
| Co | 1.012592000   | -2.607719000 | 0.263555000  |
| Cl | -1.206069000  | 4.827364000  | 0.162811000  |
| C  | -0.550669000  | 3.145245000  | -0.023456000 |
| C  | -0.945258000  | 2.511759000  | -1.136407000 |
| Cl | -1.971817000  | 3.084282000  | -2.465911000 |
| Cl | 0.142107000   | -0.579683000 | 0.373993000  |
| H  | -0.636458000  | 1.480464000  | -1.290966000 |
| C  | -4.596706000  | -0.932676000 | -3.732367000 |
| C  | -3.421579000  | -0.279847000 | -3.307473000 |
| C  | -2.904206000  | -0.485296000 | -2.022159000 |
| C  | -3.568688000  | -1.326041000 | -1.120907000 |
| C  | -4.766353000  | -1.947202000 | -1.508082000 |
| C  | -5.270437000  | -1.755721000 | -2.805021000 |
| H  | -6.171496000  | -0.929881000 | -5.234652000 |
| H  | -4.602604000  | -1.543693000 | -5.805324000 |
| H  | -4.829328000  | 0.205876000  | -5.567982000 |
| H  | -2.903568000  | 0.397573000  | -3.995106000 |
| H  | -1.973430000  | -0.003051000 | -1.717758000 |
| H  | -3.134879000  | -1.493720000 | -0.130791000 |
| H  | -5.308221000  | -2.594563000 | -0.808375000 |
| H  | -6.197594000  | -2.256770000 | -3.105529000 |
| C  | 3.683292000   | 6.086796000  | -1.754453000 |
| C  | 4.505019000   | 4.959767000  | -1.905239000 |
| C  | 3.972596000   | 3.692771000  | -2.133506000 |
| C  | 2.589376000   | 3.533885000  | -2.217917000 |
| C  | 1.749526000   | 4.642716000  | -2.115522000 |
| C  | 2.301754000   | 5.901839000  | -1.878229000 |
| O  | 2.090849000   | 2.243394000  | -2.363835000 |
| H  | 1.118488000   | 2.306676000  | -2.326376000 |
| H  | 4.844894000   | 7.812412000  | -2.341879000 |
| H  | 4.951865000   | 7.424084000  | -0.624139000 |
| H  | 3.486523000   | 8.183671000  | -1.271148000 |
| H  | 5.584508000   | 5.070166000  | -1.832724000 |
| H  | 4.623087000   | 2.832041000  | -2.239664000 |
| H  | 0.673833000   | 4.527868000  | -2.209038000 |
| H  | 1.635512000   | 6.755986000  | -1.786506000 |
| C  | 5.519986000   | 4.259958000  | 1.704221000  |
| C  | 4.521019000   | 3.126341000  | 1.413848000  |
| C  | 3.096577000   | 3.642634000  | 1.212728000  |
| N  | 2.147634000   | 2.527520000  | 0.886667000  |
| H  | 2.082647000   | 1.870071000  | 1.704263000  |
| H  | 1.130685000   | 2.839604000  | 0.665238000  |
| H  | 2.454984000   | 2.006740000  | 0.052521000  |
| H  | 7.310257000   | 3.218274000  | 0.992978000  |
| H  | 7.032637000   | 3.064951000  | 2.746642000  |
| H  | 7.650049000   | 4.599956000  | 2.079666000  |
| H  | 5.481887000   | 4.986914000  | 0.870204000  |
| H  | 5.194723000   | 4.812010000  | 2.607659000  |
| H  | 4.849667000   | 2.578433000  | 0.511663000  |
| H  | 4.530143000   | 2.398634000  | 2.247983000  |
| H  | 3.043127000   | 4.375727000  | 0.392465000  |
| H  | 2.705098000   | 4.108849000  | 2.126258000  |
| C  | -5.366033000  | -0.577124000 | 3.508636000  |
| C  | -4.689457000  | -0.497542000 | 2.129081000  |
| N  | -4.735777000  | 0.830482000  | 1.511088000  |
| C  | -3.700682000  | 1.662062000  | 1.284167000  |
| N  | -2.432834000  | 1.332199000  | 1.616582000  |
| N  | -3.945801000  | 2.876559000  | 0.768813000  |
| H  | -5.650289000  | 1.154901000  | 1.179850000  |
| H  | -1.667571000  | 1.908440000  | 1.207210000  |
| H  | -2.187023000  | 0.346007000  | 1.688843000  |
| H  | -4.885774000  | 3.125358000  | 0.451937000  |
| H  | -3.173642000  | 3.485858000  | 0.482476000  |
| H  | -7.320217000  | -0.509300000 | 4.482100000  |
| H  | -7.360452000  | -1.169678000 | 2.825282000  |
| H  | -7.182182000  | 0.589189000  | 3.090199000  |
| H  | -5.117147000  | -1.569631000 | 3.929466000  |
| H  | -4.906187000  | 0.175055000  | 4.176498000  |
| H  | -3.636217000  | -0.808830000 | 2.213587000  |
| H  | -5.170061000  | -1.204982000 | 1.429982000  |
| C  | -8.613221000  | 3.837843000  | 0.295057000  |
| C  | -8.709832000  | 2.463560000  | 0.599505000  |
| C  | -7.836987000  | 1.524179000  | 0.022757000  |
| C  | -6.833674000  | 1.939688000  | -0.870968000 |
| C  | -6.704909000  | 3.311583000  | -1.160655000 |
| C  | -7.581634000  | 4.243439000  | -0.580977000 |
| H  | -10.432453000 | 4.988663000  | 0.103875000  |
| H  | -9.150586000  | 5.822019000  | 1.015149000  |
| H  | -10.073711000 | 4.487931000  | 1.775631000  |
| H  | -9.498227000  | 2.118495000  | 1.278284000  |
| H  | -7.968335000  | 0.458308000  | 0.245978000  |
| H  | -6.176003000  | 1.206844000  | -1.354232000 |
| H  | -5.937755000  | 3.651540000  | -1.866524000 |
| H  | -7.480705000  | 5.305170000  | -0.833971000 |
| O  | 0.387982000   | 4.329766000  | 2.885671000  |
| H  | 1.347097000   | 6.147266000  | 2.429382000  |

|   |              |              |              |
|---|--------------|--------------|--------------|
| H | 1.566976000  | 5.496622000  | 4.089478000  |
| H | 0.012111000  | 6.266670000  | 3.632485000  |
| H | -0.227098000 | 4.431380000  | 2.125293000  |
| C | 0.377926000  | -3.495739000 | -5.039964000 |
| C | 0.648418000  | -2.490956000 | -3.908302000 |
| C | 0.046527000  | -1.110081000 | -4.253266000 |
| C | 2.193490000  | -2.403187000 | -3.653973000 |
| C | 2.953175000  | -1.500181000 | -4.624967000 |
| C | 2.272196000  | -1.996739000 | -2.180524000 |
| C | 3.409726000  | -2.494472000 | -1.262423000 |
| C | 4.774684000  | -1.715032000 | -1.212160000 |
| C | 5.091699000  | -1.702114000 | 0.327817000  |
| C | 3.720284000  | -1.813891000 | 0.951828000  |
| C | 3.401482000  | -1.487070000 | 2.315092000  |
| C | 4.447013000  | -0.734263000 | 3.105416000  |
| C | 6.062513000  | -2.771707000 | 0.865245000  |
| C | 4.570663000  | -0.239077000 | -1.666167000 |
| C | 5.857969000  | 0.576950000  | -1.582896000 |
| N | 6.427184000  | 0.909477000  | -2.772802000 |
| O | 6.353183000  | 0.915191000  | -0.507297000 |
| C | 5.884444000  | -2.353181000 | -2.056978000 |
| C | 3.594682000  | -4.015606000 | -1.409667000 |
| N | 2.824323000  | -2.230027000 | 0.092566000  |
| N | 1.047470000  | -2.598579000 | -1.597381000 |
| C | 0.152001000  | -2.889724000 | -2.508983000 |
| C | -1.093214000 | -3.516633000 | -2.168358000 |
| C | -2.129028000 | -3.751336000 | -3.242049000 |
| C | -1.348690000 | -3.947629000 | -0.880129000 |
| N | -0.592405000 | -3.641531000 | 0.243389000  |
| C | -2.466458000 | -4.909887000 | -0.517662000 |
| C | -2.219859000 | -6.284420000 | -1.172392000 |
| C | -2.465552000 | -4.911044000 | 1.043593000  |
| C | -2.477729000 | -6.305649000 | 1.698105000  |
| C | -3.669988000 | -4.101938000 | 1.576400000  |
| C | -1.185034000 | -4.156094000 | 1.352363000  |
| C | -0.713683000 | -3.973086000 | 2.644501000  |
| C | 0.410239000  | -3.244464000 | 3.009599000  |
| N | 1.263603000  | -2.659484000 | 2.144360000  |
| C | 0.860285000  | -3.018117000 | 4.429154000  |
| C | 1.746497000  | -4.184714000 | 4.907185000  |
| C | 1.616643000  | -1.660369000 | 4.261050000  |
| C | 2.190907000  | -1.877908000 | 2.849551000  |
| C | 2.564903000  | -1.371700000 | 5.427839000  |
| C | 0.494863000  | -0.576276000 | 4.205271000  |
| C | 0.917623000  | 0.829226000  | 3.797034000  |
| O | 1.980624000  | 1.030595000  | 3.186079000  |
| N | 0.053506000  | 1.815383000  | 4.086708000  |
| H | 0.570387000  | -4.523936000 | -4.716913000 |
| H | 1.051238000  | -3.276135000 | -5.875491000 |
| H | -0.640875000 | -3.431986000 | -5.425568000 |
| H | -1.042361000 | -1.168434000 | -4.305293000 |
| H | 0.411749000  | -0.771923000 | -5.227542000 |
| H | 0.307414000  | -0.356447000 | -3.502883000 |
| H | 2.574030000  | -3.427606000 | -3.750295000 |
| H | 4.033647000  | -1.624518000 | -4.504949000 |
| H | 2.707480000  | -0.444225000 | -4.471537000 |
| H | 2.717240000  | -1.756551000 | -5.662556000 |
| H | 5.530634000  | -0.727990000 | 0.565647000  |
| H | 3.983904000  | 0.038066000  | 3.713809000  |
| H | 5.157729000  | -0.244516000 | 2.437833000  |
| H | 5.018084000  | -1.404323000 | 3.757884000  |
| H | 6.185842000  | -2.651805000 | 1.945157000  |
| H | 7.046863000  | -2.649881000 | 0.406512000  |
| H | 5.714582000  | -3.791471000 | 0.679740000  |
| H | 3.835243000  | 0.249747000  | -1.018729000 |
| H | 4.176127000  | -0.211071000 | -2.683626000 |
| H | 6.030561000  | 0.638596000  | -3.660790000 |
| H | 7.296145000  | 1.429443000  | -2.770408000 |
| H | 6.089496000  | -3.384584000 | -1.765540000 |
| H | 6.815278000  | -1.789488000 | -1.945369000 |
| H | 5.620752000  | -2.349768000 | -3.120084000 |
| H | 2.625443000  | -4.517426000 | -1.333927000 |
| H | 4.239709000  | -4.404552000 | -0.620317000 |
| H | 4.042125000  | -4.267003000 | -2.373924000 |
| H | -3.115029000 | -3.908636000 | -2.804469000 |
| H | -1.893585000 | -4.611733000 | -3.876439000 |
| H | -2.209858000 | -2.872798000 | -3.885052000 |
| H | -3.424300000 | -4.520786000 | -0.880910000 |
| H | -3.001355000 | -6.994015000 | -0.889369000 |
| H | -1.250978000 | -6.695651000 | -0.874437000 |
| H | -2.227908000 | -6.196210000 | -2.260282000 |
| H | -2.478654000 | -6.212018000 | 2.788580000  |
| H | -1.610446000 | -6.904868000 | 1.411176000  |
| H | -3.385050000 | -6.848587000 | 1.417772000  |
| H | -3.690677000 | -3.103710000 | 1.133626000  |
| H | -3.625134000 | -3.998652000 | 2.665668000  |
| H | -4.602577000 | -4.614853000 | 1.318696000  |
| H | -1.284343000 | -4.424871000 | 3.449189000  |
| H | 0.005765000  | -2.909450000 | 5.105947000  |
| H | 1.184835000  | -5.122633000 | 4.871647000  |
| H | 2.075696000  | -4.024832000 | 5.936952000  |
| H | 2.629873000  | -4.289291000 | 4.268396000  |
| H | 2.020784000  | -1.525681000 | 6.366707000  |
| H | 2.916688000  | -0.339257000 | 5.417406000  |
| H | 3.432348000  | -2.034410000 | 5.431206000  |

|   |              |              |              |
|---|--------------|--------------|--------------|
| H | 0.003516000  | -0.551155000 | 5.185946000  |
| H | -0.265417000 | -0.882508000 | 3.472488000  |
| H | 0.212953000  | 2.777360000  | 3.741679000  |
| H | -0.808270000 | 1.618080000  | 4.576014000  |
| H | 2.173441000  | -0.909530000 | -2.068290000 |

### 6B. NpRdhA/TCE with neutralized R552, Co<sup>I</sup>

|    |               |              |              |
|----|---------------|--------------|--------------|
| C  | 4.749722000   | 7.165579000  | -1.815771000 |
| C  | 7.116805000   | 3.540453000  | 1.857182000  |
| C  | -7.004504000  | 0.324308000  | 3.270314000  |
| C  | -9.328946000  | 5.546954000  | 0.234062000  |
| C  | 1.092617000   | 5.863043000  | 2.932234000  |
| C  | -4.992437000  | -0.708815000 | -5.259584000 |
| Co | 0.830172000   | -2.547090000 | 0.445585000  |
| Cl | -0.620627000  | 3.393537000  | -0.622911000 |
| C  | -0.313543000  | 1.764423000  | -1.234311000 |
| C  | -0.796706000  | 1.410918000  | -2.427898000 |
| Cl | -1.690593000  | 2.407564000  | -3.563150000 |
| Cl | 0.381172000   | -0.339689000 | -0.140211000 |
| H  | -0.657959000  | 0.396102000  | -2.782455000 |
| C  | -4.967070000  | -0.731694000 | -3.748330000 |
| C  | -3.739435000  | -0.736872000 | -3.056288000 |
| C  | -3.695891000  | -0.793477000 | -1.657172000 |
| C  | -4.889625000  | -0.836610000 | -0.917379000 |
| C  | -6.119249000  | -0.815568000 | -1.590791000 |
| C  | -6.155129000  | -0.766115000 | -2.992482000 |
| H  | -5.988564000  | -0.436507000 | -5.645669000 |
| H  | -4.735607000  | -1.703033000 | -5.673034000 |
| H  | -4.257884000  | 0.011661000  | -5.660861000 |
| H  | -2.804967000  | -0.689954000 | -3.626837000 |
| H  | -2.730257000  | -0.806152000 | -1.142923000 |
| H  | -4.858892000  | -0.869063000 | 0.175185000  |
| H  | -7.055195000  | -0.825698000 | -1.022028000 |
| H  | -7.121471000  | -0.745573000 | -3.509335000 |
| C  | 4.186830000   | 5.776102000  | -2.030469000 |
| C  | 5.020009000   | 4.645868000  | -2.025059000 |
| C  | 4.507081000   | 3.355300000  | -2.131461000 |
| C  | 3.126732000   | 3.161423000  | -2.251436000 |
| C  | 2.284495000   | 4.271807000  | -2.349162000 |
| C  | 2.817596000   | 5.558096000  | -2.224012000 |
| O  | 2.660669000   | 1.861669000  | -2.222820000 |
| H  | 1.676102000   | 1.848206000  | -2.182387000 |
| H  | 5.555436000   | 7.383876000  | -2.525506000 |
| H  | 5.169173000   | 7.265669000  | -0.807016000 |
| H  | 3.975735000   | 7.928663000  | -1.937038000 |
| H  | 6.094396000   | 4.773098000  | -1.912094000 |
| H  | 5.166688000   | 2.495479000  | -2.091245000 |
| H  | 1.218645000   | 4.135549000  | -2.502432000 |
| H  | 2.142944000   | 6.409704000  | -2.278026000 |
| C  | 5.753219000   | 4.171931000  | 1.579976000  |
| C  | 4.651858000   | 3.114580000  | 1.429527000  |
| C  | 3.325961000   | 3.758500000  | 1.061302000  |
| N  | 2.241335000   | 2.735747000  | 0.908784000  |
| H  | 2.025545000   | 2.314659000  | 1.864654000  |
| H  | 1.365100000   | 3.171616000  | 0.565571000  |
| H  | 2.483542000   | 1.989879000  | 0.237355000  |
| H  | 7.402953000   | 2.850437000  | 1.044658000  |
| H  | 7.099827000   | 2.956212000  | 2.795473000  |
| H  | 7.903198000   | 4.308803000  | 1.955995000  |
| H  | 5.798971000   | 4.773939000  | 0.652522000  |
| H  | 5.482239000   | 4.873852000  | 2.392857000  |
| H  | 4.949133000   | 2.385404000  | 0.654099000  |
| H  | 4.542707000   | 2.551979000  | 2.375666000  |
| H  | 3.394926000   | 4.320406000  | 0.118587000  |
| H  | 2.985363000   | 4.444398000  | 1.846883000  |
| C  | -5.905514000  | -0.252246000 | 4.169664000  |
| C  | -4.638604000  | -0.581982000 | 3.367297000  |
| N  | -4.213245000  | 0.585294000  | 2.620608000  |
| C  | -3.255374000  | 0.474483000  | 1.769915000  |
| N  | -2.542485000  | -0.667407000 | 1.458617000  |
| N  | -2.826641000  | 1.627532000  | 1.085993000  |
| H  | -1.654560000  | -0.595201000 | 0.949414000  |
| H  | -2.596800000  | -1.455494000 | 2.098915000  |
| H  | -3.566445000  | 2.334564000  | 1.072344000  |
| H  | -2.465377000  | 1.453995000  | 0.142890000  |
| H  | -7.929686000  | 0.520296000  | 3.840272000  |
| H  | -7.255462000  | -0.372791000 | 2.448231000  |
| H  | -6.662232000  | 1.269331000  | 2.820480000  |
| H  | -6.256623000  | -1.166499000 | 4.684726000  |
| H  | -5.647841000  | 0.482614000  | 4.955464000  |
| H  | -3.837757000  | -0.946891000 | 4.054398000  |
| H  | -4.867206000  | -1.434312000 | 2.684803000  |
| C  | -8.151393000  | 4.687652000  | -0.192696000 |
| C  | -7.755231000  | 3.556923000  | 0.550911000  |
| C  | -6.690890000  | 2.743229000  | 0.127351000  |
| C  | -5.994477000  | 3.047433000  | -1.051926000 |
| C  | -6.368983000  | 4.176491000  | -1.797733000 |
| C  | -7.433619000  | 4.983844000  | -1.371237000 |
| H  | -10.235971000 | 5.279262000  | -0.340401000 |
| H  | -9.131012000  | 6.617730000  | 0.053012000  |
| H  | -9.560519000  | 5.412240000  | 1.303977000  |
| H  | -8.288764000  | 3.304721000  | 1.475473000  |
| H  | -6.403151000  | 1.868014000  | 0.719771000  |
| H  | -5.175785000  | 2.402719000  | -1.392037000 |



|   |              |              |              |
|---|--------------|--------------|--------------|
| H | -5.832021000 | 4.427507000  | -2.719581000 |
| H | -7.717123000 | 5.861018000  | -1.965581000 |
| O | 0.563026000  | 5.023082000  | 1.895961000  |
| H | 1.818234000  | 6.595205000  | 2.529285000  |
| H | 1.608856000  | 5.195817000  | 3.640396000  |
| H | 0.292225000  | 6.401229000  | 3.473250000  |
| H | 0.027716000  | 5.564250000  | 1.288190000  |
| C | 0.869206000  | -4.341421000 | -4.635856000 |
| C | 1.116089000  | -3.164340000 | -3.677649000 |
| C | 0.810165000  | -1.814294000 | -4.368368000 |
| C | 2.598891000  | -3.210935000 | -3.167493000 |
| C | 3.634689000  | -2.647398000 | -4.138740000 |
| C | 2.494802000  | -2.502780000 | -1.815970000 |
| C | 3.435605000  | -2.821155000 | -0.631580000 |
| C | 4.809216000  | -2.062426000 | -0.512774000 |
| C | 4.873561000  | -1.725551000 | 1.020468000  |
| C | 3.410485000  | -1.683718000 | 1.410454000  |
| C | 2.890567000  | -1.077568000 | 2.608789000  |
| C | 3.849369000  | -0.234195000 | 3.423147000  |
| C | 5.684756000  | -2.681674000 | 1.916323000  |
| C | 4.738143000  | -0.716641000 | -1.293327000 |
| C | 6.026137000  | 0.091102000  | -1.213173000 |
| N | 6.741067000  | 0.171303000  | -2.370495000 |
| O | 6.407759000  | 0.646010000  | -0.181287000 |
| C | 6.012192000  | -2.871875000 | -1.010508000 |
| C | 3.559876000  | -4.343172000 | -0.447694000 |
| N | 2.654375000  | -2.271578000 | 0.518877000  |
| N | 1.144762000  | -2.888942000 | -1.344352000 |
| C | 0.358042000  | -3.226148000 | -2.339638000 |
| C | -1.017893000 | -3.573390000 | -2.138765000 |
| C | -1.923072000 | -3.758308000 | -3.338662000 |
| C | -1.535864000 | -3.729458000 | -0.866774000 |
| N | -0.885842000 | -3.360413000 | 0.308819000  |
| C | -2.917552000 | -4.280854000 | -0.531950000 |
| C | -3.464574000 | -5.456744000 | -1.353726000 |
| C | -2.798833000 | -4.601957000 | 0.988803000  |
| C | -2.363744000 | -6.065020000 | 1.256745000  |
| C | -4.106202000 | -4.301245000 | 1.730718000  |
| C | -1.635224000 | -3.720503000 | 1.384203000  |
| C | -1.353592000 | -3.357130000 | 2.693776000  |
| C | -0.281605000 | -2.567772000 | 3.099593000  |
| N | 0.721762000  | -2.166438000 | 2.295123000  |
| C | -0.061914000 | -2.088370000 | 4.509818000  |
| C | 0.607517000  | -3.192955000 | 5.349883000  |
| C | 0.835565000  | -0.831900000 | 4.253701000  |
| C | 1.590693000  | -1.316406000 | 3.001351000  |
| C | 1.628815000  | -0.438458000 | 5.505355000  |
| C | -0.165867000 | 0.299796000  | 3.864135000  |
| C | 0.390759000  | 1.595552000  | 3.303211000  |
| O | 1.601365000  | 1.914707000  | 3.412178000  |
| N | -0.490621000 | 2.410150000  | 2.711718000  |
| H | 0.884732000  | -5.295446000 | -4.098545000 |
| H | 1.664350000  | -4.364660000 | -5.389419000 |
| H | -0.078203000 | -4.260786000 | -5.171184000 |
| H | -0.256877000 | -1.713878000 | -4.583548000 |
| H | 1.347457000  | -1.744615000 | -5.319360000 |
| H | 1.107485000  | -0.967699000 | -3.740832000 |
| H | 2.823478000  | -4.269630000 | -2.984778000 |
| H | 4.649681000  | -2.831845000 | -3.773472000 |
| H | 3.511823000  | -1.568580000 | -4.280448000 |
| H | 3.553577000  | -3.126896000 | -5.119772000 |
| H | 5.323863000  | -0.734504000 | 1.124768000  |
| H | 3.346821000  | 0.647301000  | 3.814687000  |
| H | 4.684533000  | 0.103911000  | 2.806711000  |
| H | 4.272379000  | -0.796524000 | 4.263631000  |
| H | 5.635374000  | -2.345857000 | 2.955925000  |
| H | 6.737027000  | -2.681908000 | 1.619089000  |
| H | 5.312031000  | -3.709187000 | 1.881423000  |
| H | 3.934649000  | -0.091473000 | -0.891421000 |
| H | 4.499134000  | -0.908791000 | -2.341182000 |
| H | 6.437982000  | -0.272274000 | -3.224943000 |
| H | 7.616327000  | 0.679417000  | -2.370840000 |
| H | 6.117378000  | -3.822132000 | -0.484153000 |
| H | 6.938126000  | -2.307238000 | -0.862927000 |
| H | 5.923255000  | -3.089358000 | -2.080227000 |
| H | 2.561084000  | -4.790317000 | -0.438012000 |
| H | 4.046748000  | -4.583403000 | 0.498983000  |
| H | 4.137807000  | -4.795152000 | -1.257918000 |
| H | -2.938224000 | -3.439816000 | -3.098446000 |
| H | -1.956177000 | -4.792641000 | -3.697638000 |
| H | -1.592846000 | -3.133490000 | -4.168747000 |
| H | -3.615253000 | -3.434377000 | -0.629991000 |
| H | -4.294723000 | -5.919991000 | -0.810178000 |
| H | -2.703478000 | -6.223524000 | -1.525877000 |
| H | -3.859242000 | -5.140839000 | -2.318720000 |
| H | -2.153725000 | -6.195533000 | 2.323030000  |
| H | -1.457930000 | -6.320515000 | 0.696957000  |
| H | -3.156289000 | -6.766003000 | 0.979017000  |
| H | -4.390140000 | -3.251926000 | 1.610479000  |
| H | -4.028305000 | -4.524149000 | 2.799997000  |
| H | -4.913240000 | -4.921282000 | 1.325410000  |
| H | -2.042693000 | -3.686757000 | 3.464646000  |
| H | -1.007433000 | -1.797996000 | 4.982774000  |
| H | -0.029088000 | -4.082770000 | 5.370918000  |
| H | 0.765284000  | -2.863387000 | 6.380356000  |

|   |              |              |              |
|---|--------------|--------------|--------------|
| H | 1.574444000  | -3.475776000 | 4.919984000  |
| H | 0.938541000  | -0.407133000 | 6.356767000  |
| H | 2.074713000  | 0.550069000  | 5.404658000  |
| H | 2.414110000  | -1.161514000 | 5.736701000  |
| H | -0.738731000 | 0.561599000  | 4.764343000  |
| H | -0.897171000 | -0.084966000 | 3.145938000  |
| H | -0.170830000 | 3.334309000  | 2.409013000  |
| H | -1.396078000 | 2.098411000  | 2.332807000  |
| H | 2.467273000  | -1.414376000 | -1.951209000 |
